# Supplementary material for: Prognostic value of KRAS mutation status in colorectal cancer patients: a population-based competing risk analysis
Source: PeerJ. 2020 Jun 1;8:e9149. doi: 10.7717/peerj.9149 (PMC7271887; doi:10.7717/peerj.9149)
Supplement: Supplemental Information 3 — The meanings of the code are available at the SEER website (https://seer.cancer.gov: "SEER RESEARCH DATA RECORD DESCRIPTION"). [file peerj-08-9149-s003.csv]

Year.of.diagnosis	Primary.Site	Grade	Laterality	ICD.O.3.Hist.behav	Derived.AJCC.Stage.Group..6th.ed..2004..	Derived.AJCC.Stage.Group..7th.ed..2010..	RX.Summ..Surg.Prim.Site..1998..	Radiation.recode	Chemotherapy.recode..yes..no.unk.	Radiation.sequence.with.surgery	CS.tumor.size..2004..	Regional.nodes.examined..1988..	Regional.nodes.positive..1988..	Survival.months	Vital.status.recode..study.cutoff.used.	Age.at.diagnosis	Race.recode..W..B..AI..API.	Marital.status.at.diagnosis	CS.site.spec.factor.9..2004....in.house.	Derived.AJCC.T..7th.ed..2010..	Derived.AJCC.N..7th.ed..2010..	Derived.AJCC.M..7th.ed..2010..	SEER.other.cause.of.death.classification	SEER.cause.specific.death.classification	Primary.by.international.rules	Sequence.number	Insurance.Recode..2007..	Sex
2010	185	Moderately differentiated; Grade II	Not a paired site	8140/3: Adenocarcinoma, NOS	IIB	IIC	30	None/Unknown	Yes	No radiation and/or cancer-directed surgery	65	26	0	65	Alive	67	Black	Single (never married)	10	T4b	N0	M0	N/A not first tumor	N/A not first tumor	Yes	2nd of 2 or more primaries	Insured/No specifics	Female
2010	209	Unknown	Not a paired site	8010/3: Carcinoma, NOS	IV	IVA	0	None/Unknown	Yes	No radiation and/or cancer-directed surgery	60	0	98	10	Dead	72	White	Separated	10	T3	NX	M1a	N/A not first tumor	N/A not first tumor	Yes	2nd of 2 or more primaries	Insured	Female
2011	183	Moderately differentiated; Grade II	Not a paired site	8140/3: Adenocarcinoma, NOS	IIB	IIB	40	None/Unknown	No/Unknown	No radiation and/or cancer-directed surgery	31	22	0	58	Alive	66	Asian or Pacific Islander	Married (including common law)	20	T4a	N0	M0	N/A not first tumor	N/A not first tumor	Yes	2nd of 2 or more primaries	Insured/No specifics	Female
2011	180	Moderately differentiated; Grade II	Not a paired site	8140/3: Adenocarcinoma, NOS	IV	IVA	50	None/Unknown	Yes	No radiation and/or cancer-directed surgery	50	15	7	8	Dead	67	White	Married (including common law)	20	T3	N2b	M1a	N/A not first tumor	N/A not first tumor	Yes	2nd of 2 or more primaries	Insured	Male
2011	186	Moderately differentiated; Grade II	Not a paired site	8480/3: Mucinous adenocarcinoma	IIIB	IIIB	50	None/Unknown	Yes	No radiation and/or cancer-directed surgery	90	10	1	8	Dead	67	White	Married (including common law)	10	T4a	N1a	M0	N/A not first tumor	N/A not first tumor	No	3rd of 3 or more primaries	Insured	Male
2011	180	Moderately differentiated; Grade II	Not a paired site	8140/3: Adenocarcinoma, NOS	IV	IVB	40	None/Unknown	Yes	No radiation and/or cancer-directed surgery	68	15	2	24	Dead	76	White	Married (including common law)	10	T4b	N1b	M1b	N/A not first tumor	N/A not first tumor	Yes	3rd of 3 or more primaries	Insured	Male
2010	182	Poorly differentiated; Grade III	Not a paired site	8140/3: Adenocarcinoma, NOS	IV	IVB	0	None/Unknown	Yes	No radiation and/or cancer-directed surgery	120	0	98	25	Alive	54	Black	Single (never married)	20	T4b	N1NOS	M1b	N/A not first tumor	N/A not first tumor	No	4th of 4 or more primaries	Insured	Female
2010	209	Moderately differentiated; Grade II	Not a paired site	8140/3: Adenocarcinoma, NOS	IIA	IIA	50	None/Unknown	No/Unknown	No radiation and/or cancer-directed surgery	52	5	0	14	Dead	74	White	Single (never married)	20	T3	N0	M0	N/A not first tumor	N/A not first tumor	Yes	2nd of 2 or more primaries	Insured	Male
2010	199	Moderately differentiated; Grade II	Not a paired site	8140/3: Adenocarcinoma, NOS	IIIC	IIIC	30	None/Unknown	Yes	No radiation and/or cancer-directed surgery	55	17	10	53	Dead	55	White	Married (including common law)	20	T3	N2b	M0	N/A not first tumor	N/A not first tumor	Yes	2nd of 2 or more primaries	Insured	Female
2011	183	Moderately differentiated; Grade II	Not a paired site	8140/3: Adenocarcinoma, NOS	IIIB	IIIB	40	None/Unknown	Yes	No radiation and/or cancer-directed surgery	30	23	2	51	Alive	68	White	Married (including common law)	20	T3	N1b	M0	N/A not first tumor	N/A not first tumor	Yes	3rd of 3 or more primaries	Insured	Female
2010	184	Moderately differentiated; Grade II	Not a paired site	8140/3: Adenocarcinoma, NOS	IIB	IIC	30	None/Unknown	No/Unknown	No radiation and/or cancer-directed surgery	55	20	0	4	Dead	71	White	Married (including common law)	20	T4b	N0	M0	N/A not first tumor	N/A not first tumor	No	2nd of 2 or more primaries	Any Medicaid	Male
2011	187	Poorly differentiated; Grade III	Not a paired site	8140/3: Adenocarcinoma, NOS	IV	IVB	30	None/Unknown	Yes	No radiation and/or cancer-directed surgery	70	21	17	27	Dead	76	Asian or Pacific Islander	Single (never married)	20	T4a	N2b	M1b	N/A not first tumor	N/A not first tumor	Yes	2nd of 2 or more primaries	Insured/No specifics	Male
2012	182	Moderately differentiated; Grade II	Not a paired site	8140/3: Adenocarcinoma, NOS	IV	IVA	40	None/Unknown	Yes	No radiation and/or cancer-directed surgery	700	8	5	20	Dead	90	Black	Married (including common law)	10	T3	N2a	M1a	N/A not first tumor	N/A not first tumor	Yes	2nd of 2 or more primaries	Insured	Male
2011	187	Moderately differentiated; Grade II	Not a paired site	8480/3: Mucinous adenocarcinoma	IIIC	IIIB	50	None/Unknown	No/Unknown	No radiation and/or cancer-directed surgery	40	37	5	50	Alive	70	Black	Married (including common law)	10	T3	N2a	M0	N/A not first tumor	N/A not first tumor	Yes	2nd of 2 or more primaries	Insured	Male
2012	180	Poorly differentiated; Grade III	Not a paired site	8140/3: Adenocarcinoma, NOS	IV	IVB	0	None/Unknown	Yes	No radiation and/or cancer-directed surgery	15	0	98	4	Dead	80	White	Widowed	10	T1	N0	M1b	N/A not first tumor	N/A not first tumor	Yes	2nd of 2 or more primaries	Insured	Female
2011	187	Unknown	Not a paired site	8140/3: Adenocarcinoma, NOS	IV	IVB	0	None/Unknown	No/Unknown	No radiation and/or cancer-directed surgery	999	0	98	8	Dead	74	White	Married (including common law)	20	TX	NX	M1b	N/A not first tumor	N/A not first tumor	Yes	2nd of 2 or more primaries	Insured	Male
2012	180	Unknown	Not a paired site	8210/3: Adenocarcinoma in adenomatous polyp	0	0	0	None/Unknown	Yes	No radiation and/or cancer-directed surgery	999	0	98	6	Dead	92	White	Widowed	20	Tis	N0	M0	N/A not first tumor	N/A not first tumor	Yes	4th of 4 or more primaries	Insured	Female
2011	183	Unknown	Not a paired site	8140/3: Adenocarcinoma, NOS	IV	IVA	40	None/Unknown	Yes	No radiation and/or cancer-directed surgery	85	16	3	23	Dead	65	Black	Married (including common law)	10	T3	N1b	M1a	N/A not first tumor	N/A not first tumor	Yes	2nd of 2 or more primaries	Insured	Male
2010	180	Moderately differentiated; Grade II	Not a paired site	8140/3: Adenocarcinoma, NOS	IIIB	IIIB	40	None/Unknown	Yes	No radiation and/or cancer-directed surgery	65	12	3	14	Dead	84	Black	Married (including common law)	20	T3	N1b	M0	N/A not first tumor	N/A not first tumor	Yes	2nd of 2 or more primaries	Insured/No specifics	Male
2010	186	Moderately differentiated; Grade II	Not a paired site	8140/3: Adenocarcinoma, NOS	IIA	IIA	40	None/Unknown	Yes	No radiation and/or cancer-directed surgery	17	18	0	67	Alive	50	Asian or Pacific Islander	Married (including common law)	10	T3	N0	M0	N/A not first tumor	N/A not first tumor	Yes	2nd of 2 or more primaries	Insured	Female
2010	189	Unknown	Not a paired site	8140/3: Adenocarcinoma, NOS	IV	IVA	0	None/Unknown	Yes	No radiation and/or cancer-directed surgery	0	0	98	61	Alive	84	Asian or Pacific Islander	Married (including common law)	20	T0	N0	M1a	N/A not first tumor	N/A not first tumor	Yes	2nd of 2 or more primaries	Insured/No specifics	Male
2010	182	Moderately differentiated; Grade II	Not a paired site	8140/3: Adenocarcinoma, NOS	IIIB	IIIB	40	None/Unknown	Yes	No radiation and/or cancer-directed surgery	25	12	2	65	Alive	61	White	Married (including common law)	20	T3	N1b	M0	N/A not first tumor	N/A not first tumor	Yes	2nd of 2 or more primaries	Insured	Male
2010	185	Moderately differentiated; Grade II	Not a paired site	8140/3: Adenocarcinoma, NOS	I	I	30	None/Unknown	Yes	No radiation and/or cancer-directed surgery	26	12	0	67	Alive	74	Black	Single (never married)	10	T2	N0	M0	N/A not first tumor	N/A not first tumor	Yes	2nd of 2 or more primaries	Insured/No specifics	Male
2011	180	Unknown	Not a paired site	8140/3: Adenocarcinoma, NOS	IV	IVB	40	None/Unknown	Yes	No radiation and/or cancer-directed surgery	999	19	0	24	Dead	62	White	Married (including common law)	20	T3	N0	M1b	N/A not first tumor	N/A not first tumor	Yes	2nd of 2 or more primaries	Insured/No specifics	Female
2012	187	Unknown	Not a paired site	8140/3: Adenocarcinoma, NOS	IV	IVB	0	None/Unknown	Yes	No radiation and/or cancer-directed surgery	999	0	98	4	Dead	90	White	Married (including common law)	20	T3	NX	M1b	N/A not first tumor	N/A not first tumor	Yes	2nd of 2 or more primaries	Insured	Male
2010	184	Poorly differentiated; Grade III	Not a paired site	8140/3: Adenocarcinoma, NOS	IV	IVA	30	None/Unknown	Yes	No radiation and/or cancer-directed surgery	60	19	0	8	Dead	67	White	Married (including common law)	20	T4b	N0	M1a	N/A not first tumor	N/A not first tumor	Yes	2nd of 2 or more primaries	Insured	Male
2010	180	Moderately differentiated; Grade II	Not a paired site	8140/3: Adenocarcinoma, NOS	IIIB	IIIB	40	None/Unknown	Yes	No radiation and/or cancer-directed surgery	30	24	1	70	Alive	68	White	Married (including common law)	20	T3	N1a	M0	N/A not first tumor	N/A not first tumor	Yes	2nd of 2 or more primaries	Insured	Male
2012	184	Poorly differentiated; Grade III	Not a paired site	8140/3: Adenocarcinoma, NOS	IV	IVA	40	None/Unknown	Yes	No radiation and/or cancer-directed surgery	65	23	8	26	Dead	73	White	Married (including common law)	10	T3	N2b	M1a	N/A not first tumor	N/A not first tumor	Yes	2nd of 2 or more primaries	Insured	Male
2011	199	Moderately differentiated; Grade II	Not a paired site	8140/3: Adenocarcinoma, NOS	IV	IVA	70	Beam radiation	Yes	Radiation prior to surgery	60	5	1	40	Dead	58	Asian or Pacific Islander	Divorced	20	T4b	N1a	M1a	N/A not first tumor	N/A not first tumor	Yes	2nd of 2 or more primaries	Any Medicaid	Female
2012	184	Moderately differentiated; Grade II	Right - origin of primary	8140/3: Adenocarcinoma, NOS	IV	IVA	32	None/Unknown	Yes	No radiation and/or cancer-directed surgery	45	2	0	47	Alive	54	Asian or Pacific Islander	Married (including common law)	20	T4b	N0	M1a	N/A not first tumor	N/A not first tumor	No	2nd of 2 or more primaries	Insured/No specifics	Female
2010	187	Moderately differentiated; Grade II	Not a paired site	8210/3: Adenocarcinoma in adenomatous polyp	IIA	IIA	30	None/Unknown	No/Unknown	No radiation and/or cancer-directed surgery	21	14	0	62	Alive	67	White	Single (never married)	20	T3	N0	M0	N/A not first tumor	N/A not first tumor	No	2nd of 2 or more primaries	Insured	Male
2010	209	Moderately differentiated; Grade II	Not a paired site	8140/3: Adenocarcinoma, NOS	IV	IVB	0	None/Unknown	Yes	No radiation and/or cancer-directed surgery	30	0	98	20	Dead	60	White	Married (including common law)	10	T3	N1NOS	M1b	N/A not first tumor	N/A not first tumor	Yes	2nd of 2 or more primaries	Insured	Male
2010	180	Moderately differentiated; Grade II	Not a paired site	8140/3: Adenocarcinoma, NOS	IV	IVA	41	None/Unknown	Yes	No radiation and/or cancer-directed surgery	50	0	98	11	Dead	63	White	Married (including common law)	20	T4b	N1c	M1a	N/A not first tumor	N/A not first tumor	Yes	3rd of 3 or more primaries	Insured	Female
2012	182	Moderately differentiated; Grade II	Not a paired site	8140/3: Adenocarcinoma, NOS	IV	IVB	30	None/Unknown	No/Unknown	No radiation and/or cancer-directed surgery	35	12	0	19	Dead	63	White	Divorced	20	T4a	N0	M1b	N/A not first tumor	N/A not first tumor	Yes	2nd of 2 or more primaries	Insured	Female
2012	184	Well differentiated; Grade I	Not a paired site	8263/3: Adenocarcinoma in tubulovillous adenoma	IIA	IIA	40	None/Unknown	No/Unknown	No radiation and/or cancer-directed surgery	95	34	0	38	Alive	82	White	Married (including common law)	20	T3	N0	M0	N/A not first tumor	N/A not first tumor	Yes	2nd of 2 or more primaries	Insured/No specifics	Male
2010	187	Moderately differentiated; Grade II	Not a paired site	8140/3: Adenocarcinoma, NOS	IV	IVA	30	None/Unknown	Yes	No radiation and/or cancer-directed surgery	70	2	0	32	Dead	41	White	Married (including common law)	20	T4b	N0	M1a	N/A not first tumor	N/A not first tumor	Yes	2nd of 2 or more primaries	Insured/No specifics	Male
2010	183	Moderately differentiated; Grade II	Not a paired site	8140/3: Adenocarcinoma, NOS	IIA	IIA	40	None/Unknown	No/Unknown	No radiation and/or cancer-directed surgery	80	22	0	68	Alive	63	Black	Single (never married)	20	T3	N0	M0	Alive or dead due to cancer	Alive or dead of other cause	Yes	One primary only	Insured	Female
2010	180	Moderately differentiated; Grade II	Not a paired site	8140/3: Adenocarcinoma, NOS	IV	IVA	0	None/Unknown	Yes	No radiation and/or cancer-directed surgery	999	0	98	20	Dead	61	White	Married (including common law)	10	T4b	N1NOS	M1a	Alive or dead due to cancer	Dead (attributable to this cancer dx)	Yes	One primary only	Insured	Male
2010	209	Moderately differentiated; Grade II	Not a paired site	8140/3: Adenocarcinoma, NOS	IV	IVNOS	0	None/Unknown	Yes	No radiation and/or cancer-directed surgery	999	0	98	27	Dead	69	Black	Married (including common law)	10	T2	N0	M1NOS	Alive or dead due to cancer	Dead (attributable to this cancer dx)	Yes	One primary only	Insured	Female
2010	187	Moderately differentiated; Grade II	Not a paired site	8480/3: Mucinous adenocarcinoma	IV	IVNOS	0	None/Unknown	Yes	No radiation and/or cancer-directed surgery	999	0	98	30	Dead	48	White	Married (including common law)	10	TX	NX	M1NOS	Alive or dead due to cancer	Dead (attributable to this cancer dx)	Yes	One primary only	Insured	Female
2010	187	Moderately differentiated; Grade II	Not a paired site	8140/3: Adenocarcinoma, NOS	IIIC	IIIB	30	None/Unknown	Yes	No radiation and/or cancer-directed surgery	35	14	5	68	Dead	46	White	Single (never married)	10	T3	N2a	M0	Alive or dead due to cancer	Dead (attributable to this cancer dx)	Yes	One primary only	Any Medicaid	Female
2010	187	Moderately differentiated; Grade II	Not a paired site	8140/3: Adenocarcinoma, NOS	IV	IVA	30	None/Unknown	Yes	No radiation and/or cancer-directed surgery	65	20	3	35	Dead	42	White	Married (including common law)	20	T4b	N1b	M1a	Alive or dead due to cancer	Dead (attributable to this cancer dx)	Yes	One primary only	Insured	Male
2010	182	Moderately differentiated; Grade II	Not a paired site	8263/3: Adenocarcinoma in tubulovillous adenoma	IV	IVA	0	None/Unknown	Yes	No radiation and/or cancer-directed surgery	999	0	98	9	Dead	50	White	Divorced	10	T1	N0	M1a	Alive or dead due to cancer	Dead (attributable to this cancer dx)	Yes	One primary only	Insured	Male
2010	209	Moderately differentiated; Grade II	Not a paired site	8140/3: Adenocarcinoma, NOS	IV	IVA	0	Beam radiation	Yes	No radiation and/or cancer-directed surgery	70	0	98	30	Dead	38	Asian or Pacific Islander	Married (including common law)	20	T3	N1NOS	M1a	Alive or dead due to cancer	Dead (attributable to this cancer dx)	Yes	One primary only	Insured	Male
2010	199	Moderately differentiated; Grade II	Not a paired site	8140/3: Adenocarcinoma, NOS	IIIC	IIIC	30	Beam radiation	Yes	Radiation after surgery	17	12	7	67	Alive	55	Asian or Pacific Islander	Married (including common law)	10	T3	N2b	M0	Alive or dead due to cancer	Alive or dead of other cause	Yes	1st of 2 or more primaries	Insured	Male
2010	183	Unknown	Not a paired site	8140/3: Adenocarcinoma, NOS	IV	IVA	0	None/Unknown	Yes	No radiation and/or cancer-directed surgery	50	0	98	16	Dead	63	White	Married (including common law)	10	TX	NX	M1a	Alive or dead due to cancer	Dead (attributable to this cancer dx)	Yes	One primary only	Insured	Male
2010	180	Moderately differentiated; Grade II	Not a paired site	8480/3: Mucinous adenocarcinoma	IV	IVB	40	None/Unknown	Yes	No radiation and/or cancer-directed surgery	80	16	0	66	Alive	66	White	Married (including common law)	10	T4a	N0	M1b	Alive or dead due to cancer	Alive or dead of other cause	Yes	One primary only	Insured	Male
2010	187	Moderately differentiated; Grade II	Not a paired site	8140/3: Adenocarcinoma, NOS	IV	IVA	30	None/Unknown	Yes	No radiation and/or cancer-directed surgery	15	9	3	33	Dead	61	White	Married (including common law)	20	T4a	N1b	M1a	Alive or dead due to cancer	Dead (attributable to this cancer dx)	Yes	One primary only	Insured	Female
2012	183	Unknown	Not a paired site	8140/3: Adenocarcinoma, NOS	IV	IVA	0	None/Unknown	Yes	No radiation and/or cancer-directed surgery	999	0	98	21	Dead	52	White	Married (including common law)	20	T4b	N1NOS	M1a	N/A not first tumor	N/A not first tumor	Yes	2nd of 2 or more primaries	Insured	Female
2010	187	Unknown	Not a paired site	8140/3: Adenocarcinoma, NOS	IV	IVB	0	None/Unknown	Yes	No radiation and/or cancer-directed surgery	999	0	98	16	Dead	54	Asian or Pacific Islander	Married (including common law)	10	TX	N1NOS	M1b	Dead (missing/unknown COD)	Dead (missing/unknown COD)	Yes	One primary only	Insured	Male
2010	187	Moderately differentiated; Grade II	Not a paired site	8140/3: Adenocarcinoma, NOS	IV	IVB	0	None/Unknown	Yes	No radiation and/or cancer-directed surgery	999	0	98	12	Dead	53	White	Single (never married)	20	T4b	N2NOS	M1b	Alive or dead due to cancer	Dead (attributable to this cancer dx)	Yes	One primary only	Any Medicaid	Male
2010	185	Unknown	Not a paired site	8140/3: Adenocarcinoma, NOS	IV	IVB	0	None/Unknown	Yes	No radiation and/or cancer-directed surgery	75	0	98	6	Dead	59	White	Divorced	10	T4b	N1NOS	M1b	Alive or dead due to cancer	Dead (attributable to this cancer dx)	Yes	One primary only	Insured	Male
2010	209	Moderately differentiated; Grade II	Not a paired site	8140/3: Adenocarcinoma, NOS	IIIB	IIIB	30	Beam radiation	Yes	Radiation prior to surgery	67	15	0	21	Dead	49	White	Divorced	10	T4a	N1NOS	M0	Alive or dead due to cancer	Dead (attributable to this cancer dx)	Yes	One primary only	Any Medicaid	Female
2010	199	Poorly differentiated; Grade III	Not a paired site	8140/3: Adenocarcinoma, NOS	IV	IVB	30	None/Unknown	Yes	No radiation and/or cancer-directed surgery	60	15	4	4	Dead	52	Unknown	Single (never married)	20	T4a	N2a	M1b	Alive or dead due to cancer	Dead (attributable to this cancer dx)	Yes	One primary only	Insured/No specifics	Female
2010	186	Moderately differentiated; Grade II	Not a paired site	8140/3: Adenocarcinoma, NOS	IIIB	IIIB	40	None/Unknown	No/Unknown	No radiation and/or cancer-directed surgery	45	24	1	67	Alive	74	Asian or Pacific Islander	Married (including common law)	20	T3	N1a	M0	Alive or dead due to cancer	Alive or dead of other cause	Yes	One primary only	Insured/No specifics	Male
2010	187	Moderately differentiated; Grade II	Not a paired site	8140/3: Adenocarcinoma, NOS	IV	IVA	30	None/Unknown	Yes	No radiation and/or cancer-directed surgery	46	8	8	17	Dead	62	White	Single (never married)	20	T4a	N2b	M1a	Alive or dead due to cancer	Dead (attributable to this cancer dx)	Yes	One primary only	Insured/No specifics	Male
2010	186	Unknown	Not a paired site	8140/3: Adenocarcinoma, NOS	IV	IVB	0	None/Unknown	Yes	No radiation and/or cancer-directed surgery	40	0	98	19	Dead	53	Asian or Pacific Islander	Married (including common law)	20	TX	N0	M1b	Alive or dead due to cancer	Dead (attributable to this cancer dx)	Yes	One primary only	Insured	Female
2010	184	Moderately differentiated; Grade II	Not a paired site	8263/3: Adenocarcinoma in tubulovillous adenoma	IV	IVB	0	None/Unknown	Yes	No radiation and/or cancer-directed surgery	999	0	98	4	Dead	78	White	Widowed	20	T1	N0	M1b	Alive or dead due to cancer	Dead (attributable to this cancer dx)	Yes	1st of 2 or more primaries	Insured	Male
2010	184	Poorly differentiated; Grade III	Not a paired site	8243/3: Goblet cell carcinoid	NA	IVB	40	None/Unknown	Yes	No radiation and/or cancer-directed surgery	34	28	6	13	Dead	49	White	Widowed	10	T4a	N2a	M1b	Alive or dead due to cancer	Dead (attributable to this cancer dx)	Yes	One primary only	Any Medicaid	Female
2010	182	Unknown	Not a paired site	8140/3: Adenocarcinoma, NOS	IV	IVA	0	None/Unknown	Yes	No radiation and/or cancer-directed surgery	22	0	98	19	Dead	73	White	Widowed	10	TX	N0	M1a	N/A not first tumor	N/A not first tumor	Yes	2nd of 2 or more primaries	Insured/No specifics	Female
2010	182	Poorly differentiated; Grade III	Not a paired site	8140/3: Adenocarcinoma, NOS	IIIB	IIIB	30	None/Unknown	Yes	No radiation and/or cancer-directed surgery	80	20	1	21	Dead	76	White	Married (including common law)	10	T3	N1a	M0	Alive or dead due to cancer	Dead (attributable to this cancer dx)	Yes	One primary only	Insured/No specifics	Female
2010	187	Poorly differentiated; Grade III	Not a paired site	8140/3: Adenocarcinoma, NOS	IV	IVA	30	None/Unknown	Yes	No radiation and/or cancer-directed surgery	45	17	4	64	Alive	69	Black	Married (including common law)	20	T4a	N2a	M1a	Alive or dead due to cancer	Alive or dead of other cause	Yes	One primary only	Insured/No specifics	Male
2010	187	Moderately differentiated; Grade II	Not a paired site	8140/3: Adenocarcinoma, NOS	IV	IVB	30	None/Unknown	Yes	No radiation and/or cancer-directed surgery	105	23	0	11	Alive	52	Asian or Pacific Islander	Married (including common law)	20	T3	N0	M1b	Alive or dead due to cancer	Alive or dead of other cause	Yes	One primary only	Insured/No specifics	Female
2012	209	Moderately differentiated; Grade II	Not a paired site	8140/3: Adenocarcinoma, NOS	IV	IVB	0	None/Unknown	Yes	No radiation and/or cancer-directed surgery	50	0	98	44	Alive	75	White	Married (including common law)	20	TX	NX	M1b	N/A not first tumor	N/A not first tumor	Yes	2nd of 2 or more primaries	Insured	Female
2010	209	Moderately differentiated; Grade II	Not a paired site	8140/3: Adenocarcinoma, NOS	IIIC	IIINOS	50	Beam radiation	Yes	Radiation before and after surgery	60	14	5	36	Dead	75	Asian or Pacific Islander	Single (never married)	10	T3	N2NOS	M0	Alive or dead due to cancer	Dead (attributable to this cancer dx)	Yes	One primary only	Insured	Female
2010	199	Moderately differentiated; Grade II	Not a paired site	8140/3: Adenocarcinoma, NOS	IV	IVB	0	None/Unknown	Yes	No radiation and/or cancer-directed surgery	999	0	98	12	Dead	89	Asian or Pacific Islander	Married (including common law)	20	TX	N0	M1b	Alive or dead due to cancer	Dead (attributable to this cancer dx)	Yes	One primary only	Insured	Male
2010	180	Moderately differentiated; Grade II	Not a paired site	8480/3: Mucinous adenocarcinoma	IV	IVB	40	None/Unknown	Yes	No radiation and/or cancer-directed surgery	70	13	13	18	Dead	30	Black	Married (including common law)	20	T4b	N2b	M1b	Dead (missing/unknown COD)	Dead (missing/unknown COD)	Yes	One primary only	Any Medicaid	Male
2010	209	Unknown	Not a paired site	8140/3: Adenocarcinoma, NOS	IV	IVB	0	Radiation, NOS method or source not specified	Yes	No radiation and/or cancer-directed surgery	80	0	98	8	Dead	38	Asian or Pacific Islander	Married (including common law)	10	T3	N1NOS	M1b	Alive or dead due to cancer	Dead (attributable to this cancer dx)	Yes	One primary only	Insured	Male
2010	187	Unknown	Not a paired site	8140/3: Adenocarcinoma, NOS	IV	IVA	0	None/Unknown	Yes	No radiation and/or cancer-directed surgery	50	0	98	38	Dead	80	White	Single (never married)	10	T1	N0	M1a	Dead (missing/unknown COD)	Dead (missing/unknown COD)	Yes	One primary only	Insured/No specifics	Male
2010	199	Moderately differentiated; Grade II	Not a paired site	8140/3: Adenocarcinoma, NOS	IIIB	IIIB	30	Beam radiation	Yes	Radiation prior to surgery	999	0	98	63	Alive	59	White	Single (never married)	10	T3	N1NOS	M0	Alive or dead due to cancer	Alive or dead of other cause	Yes	One primary only	Insured	Male
2010	182	Unknown	Not a paired site	8140/3: Adenocarcinoma, NOS	IV	IVA	0	None/Unknown	Yes	No radiation and/or cancer-directed surgery	47	0	98	14	Dead	58	White	Unknown	10	TX	N0	M1a	Alive or dead due to cancer	Dead (attributable to this cancer dx)	Yes	One primary only	Insured	Male
2010	187	Moderately differentiated; Grade II	Not a paired site	8140/3: Adenocarcinoma, NOS	IV	IVB	0	None/Unknown	Yes	No radiation and/or cancer-directed surgery	50	0	98	36	Dead	51	White	Unknown	10	TX	N1NOS	M1b	Alive or dead due to cancer	Dead (attributable to this cancer dx)	Yes	One primary only	Insured	Female
2010	187	Moderately differentiated; Grade II	Not a paired site	8140/3: Adenocarcinoma, NOS	IV	IVA	30	None/Unknown	Yes	No radiation and/or cancer-directed surgery	35	6	0	32	Dead	47	White	Single (never married)	10	T3	N0	M1a	Alive or dead due to cancer	Dead (attributable to this cancer dx)	Yes	One primary only	Insured/No specifics	Male
2010	187	Moderately differentiated; Grade II	Not a paired site	8210/3: Adenocarcinoma in adenomatous polyp	IV	IVA	30	None/Unknown	Yes	No radiation and/or cancer-directed surgery	40	28	4	39	Dead	58	Black	Single (never married)	20	T3	N2a	M1a	Alive or dead due to cancer	Dead (attributable to this cancer dx)	Yes	One primary only	Insured/No specifics	Male
2010	187	Moderately differentiated; Grade II	Right - origin of primary	8140/3: Adenocarcinoma, NOS	IV	IVB	30	None/Unknown	Yes	No radiation and/or cancer-directed surgery	37	14	8	30	Dead	32	White	Married (including common law)	20	T3	N2b	M1b	Alive or dead due to cancer	Dead (attributable to this cancer dx)	Yes	One primary only	Insured	Female
2010	199	Unknown	Not a paired site	8140/3: Adenocarcinoma, NOS	IV	IVB	0	None/Unknown	Yes	No radiation and/or cancer-directed surgery	30	0	98	25	Dead	63	White	Married (including common law)	20	TX	N0	M1b	Alive or dead due to cancer	Dead (attributable to this cancer dx)	Yes	One primary only	Insured	Male
2010	187	Undifferentiated; anaplastic; Grade IV	Not a paired site	8140/3: Adenocarcinoma, NOS	IV	IVA	32	None/Unknown	Yes	No radiation and/or cancer-directed surgery	50	34	29	30	Dead	44	White	Married (including common law)	20	T3	N2b	M1a	Alive or dead due to cancer	Dead (attributable to this cancer dx)	Yes	One primary only	Insured	Female
2010	180	Moderately differentiated; Grade II	Paired site, but no information concerning laterality	8140/3: Adenocarcinoma, NOS	IIA	IIA	50	None/Unknown	No/Unknown	No radiation and/or cancer-directed surgery	10	53	0	21	Dead	65	White	Single (never married)	20	T3	N0	M0	Dead (attributable to causes other than this cancer dx)	Alive or dead of other cause	Yes	1st of 2 or more primaries	Insured	Female
2010	187	Well differentiated; Grade I	Not a paired site	8140/3: Adenocarcinoma, NOS	IV	IVB	30	None/Unknown	Yes	No radiation and/or cancer-directed surgery	100	10	2	40	Dead	43	Asian or Pacific Islander	Married (including common law)	20	T4a	N1b	M1b	Alive or dead due to cancer	Dead (attributable to this cancer dx)	Yes	One primary only	Insured	Male
2010	183	Moderately differentiated; Grade II	Not a paired site	8140/3: Adenocarcinoma, NOS	IV	IVA	41	None/Unknown	No/Unknown	No radiation and/or cancer-directed surgery	19	23	4	16	Dead	77	White	Widowed	20	T3	N2a	M1a	Alive or dead due to cancer	Dead (attributable to this cancer dx)	Yes	One primary only	Insured	Female
2010	187	Moderately differentiated; Grade II	Not a paired site	8140/3: Adenocarcinoma, NOS	IV	IVB	0	None/Unknown	Yes	No radiation and/or cancer-directed surgery	30	0	98	19	Dead	81	Asian or Pacific Islander	Married (including common law)	20	T1	N0	M1b	N/A not first tumor	N/A not first tumor	Yes	2nd of 2 or more primaries	Any Medicaid	Male
2010	180	Moderately differentiated; Grade II	Not a paired site	8481/3: Mucin-producing adenocarcinoma	IV	IVB	30	None/Unknown	Yes	No radiation and/or cancer-directed surgery	35	7	6	17	Dead	72	White	Married (including common law)	10	T4a	N2a	M1b	Alive or dead due to cancer	Dead (attributable to this cancer dx)	Yes	One primary only	Insured/No specifics	Female
2010	209	Unknown	Not a paired site	8140/3: Adenocarcinoma, NOS	IV	IVB	0	None/Unknown	Yes	No radiation and/or cancer-directed surgery	20	0	98	7	Dead	54	Black	Divorced	10	T2	N0	M1b	Alive or dead due to cancer	Dead (attributable to this cancer dx)	Yes	One primary only	Insured	Male
2010	182	Moderately differentiated; Grade II	Not a paired site	8263/3: Adenocarcinoma in tubulovillous adenoma	IV	IVB	40	None/Unknown	No/Unknown	No radiation and/or cancer-directed surgery	45	12	4	27	Dead	61	White	Married (including common law)	10	T3	N2a	M1b	Alive or dead due to cancer	Dead (attributable to this cancer dx)	Yes	One primary only	Any Medicaid	Female
2010	187	Moderately differentiated; Grade II	Not a paired site	8140/3: Adenocarcinoma, NOS	IIIC	IIIB	30	None/Unknown	Yes	No radiation and/or cancer-directed surgery	26	22	6	69	Alive	76	White	Married (including common law)	10	T3	N2a	M0	Alive or dead due to cancer	Alive or dead of other cause	Yes	One primary only	Insured	Male
2010	187	Moderately differentiated; Grade II	Not a paired site	8140/3: Adenocarcinoma, NOS	IIIC	IIIC	40	None/Unknown	Yes	No radiation and/or cancer-directed surgery	35	12	7	71	Alive	45	Black	Divorced	20	T3	N2b	M0	Alive or dead due to cancer	Alive or dead of other cause	Yes	One primary only	Insured	Male
2010	184	Unknown	Not a paired site	8140/3: Adenocarcinoma, NOS	IV	IVB	0	None/Unknown	Yes	No radiation and/or cancer-directed surgery	999	0	98	26	Dead	65	White	Divorced	20	TX	NX	M1b	Alive or dead due to cancer	Dead (attributable to this cancer dx)	Yes	One primary only	Any Medicaid	Male
2010	187	Moderately differentiated; Grade II	Not a paired site	8140/3: Adenocarcinoma, NOS	IV	IVB	0	None/Unknown	Yes	No radiation and/or cancer-directed surgery	50	98	0	23	Dead	63	White	Married (including common law)	20	TX	N0	M1b	Alive or dead due to cancer	Dead (attributable to this cancer dx)	Yes	One primary only	Insured	Male
2010	187	Moderately differentiated; Grade II	Not a paired site	8140/3: Adenocarcinoma, NOS	IV	IVA	30	None/Unknown	Yes	No radiation and/or cancer-directed surgery	11	17	0	62	Alive	49	White	Single (never married)	20	T3	N0	M1a	Alive or dead due to cancer	Alive or dead of other cause	Yes	One primary only	Insured	Male
2010	199	Poorly differentiated; Grade III	Not a paired site	8140/3: Adenocarcinoma, NOS	IV	IVA	0	None/Unknown	Yes	No radiation and/or cancer-directed surgery	50	0	98	6	Dead	54	White	Married (including common law)	20	TX	NX	M1a	Alive or dead due to cancer	Dead (attributable to this cancer dx)	Yes	One primary only	Insured	Male
2010	180	Moderately differentiated; Grade II	Not a paired site	8140/3: Adenocarcinoma, NOS	IV	IVA	40	None/Unknown	Yes	No radiation and/or cancer-directed surgery	45	18	7	10	Dead	81	White	Married (including common law)	10	T3	N2b	M1a	Alive or dead due to cancer	Dead (attributable to this cancer dx)	Yes	One primary only	Insured	Male
2010	199	Moderately differentiated; Grade II	Not a paired site	8480/3: Mucinous adenocarcinoma	IV	IVA	30	None/Unknown	Yes	No radiation and/or cancer-directed surgery	26	14	5	56	Alive	50	White	Married (including common law)	20	T3	N2a	M1a	Alive or dead due to cancer	Alive or dead of other cause	Yes	One primary only	Insured	Male
2010	187	Unknown	Not a paired site	8140/3: Adenocarcinoma, NOS	IV	IVA	0	None/Unknown	Yes	No radiation and/or cancer-directed surgery	30	0	98	23	Dead	38	White	Married (including common law)	20	TX	N0	M1a	Alive or dead due to cancer	Dead (attributable to this cancer dx)	Yes	One primary only	Insured	Male
2010	183	Moderately differentiated; Grade II	Not a paired site	8140/3: Adenocarcinoma, NOS	IV	IVB	40	None/Unknown	Yes	No radiation and/or cancer-directed surgery	27	28	0	14	Dead	72	Asian or Pacific Islander	Married (including common law)	10	T4b	N0	M1b	Alive or dead due to cancer	Dead (attributable to this cancer dx)	Yes	One primary only	Insured	Male
2010	209	Moderately differentiated; Grade II	Not a paired site	8140/3: Adenocarcinoma, NOS	IV	IVB	0	None/Unknown	Yes	No radiation and/or cancer-directed surgery	40	0	98	38	Dead	69	White	Married (including common law)	20	T3	N0	M1b	Alive or dead due to cancer	Dead (attributable to this cancer dx)	Yes	One primary only	Insured/No specifics	Male
2011	187	Moderately differentiated; Grade II	Not a paired site	8140/3: Adenocarcinoma, NOS	IIA	IIA	30	None/Unknown	No/Unknown	No radiation and/or cancer-directed surgery	45	10	0	34	Dead	57	Asian or Pacific Islander	Single (never married)	20	T3	N0	M0	Alive or dead due to cancer	Dead (attributable to this cancer dx)	Yes	One primary only	Any Medicaid	Male
2011	199	Poorly differentiated; Grade III	Not a paired site	8140/3: Adenocarcinoma, NOS	IV	IVA	30	Beam radiation	Yes	Radiation prior to surgery	50	17	1	40	Dead	44	White	Married (including common law)	20	T3	N1NOS	M1a	Alive or dead due to cancer	Dead (attributable to this cancer dx)	Yes	1st of 2 or more primaries	Insured	Male
2011	199	Poorly differentiated; Grade III	Not a paired site	8140/3: Adenocarcinoma, NOS	IV	IVA	30	Beam radiation	Yes	Radiation prior to surgery	60	17	1	40	Dead	44	White	Married (including common law)	20	T1	N1NOS	M1a	N/A not first tumor	N/A not first tumor	No	2nd of 2 or more primaries	Insured	Male
2011	180	Moderately differentiated; Grade II	Not a paired site	8140/3: Adenocarcinoma, NOS	IV	IVB	90	None/Unknown	Yes	No radiation and/or cancer-directed surgery	40	10	1	33	Dead	46	Black	Single (never married)	10	T3	N1a	M1b	Alive or dead due to cancer	Dead (attributable to this cancer dx)	Yes	One primary only	Insured/No specifics	Female
2010	187	Moderately differentiated; Grade II	Not a paired site	8140/3: Adenocarcinoma, NOS	IV	IVB	30	None/Unknown	Yes	No radiation and/or cancer-directed surgery	59	13	2	44	Dead	40	White	Married (including common law)	20	T3	N1b	M1b	Alive or dead due to cancer	Dead (attributable to this cancer dx)	Yes	One primary only	Insured	Female
2011	209	Unknown	Not a paired site	8140/3: Adenocarcinoma, NOS	IV	IVNOS	0	None/Unknown	Yes	No radiation and/or cancer-directed surgery	43	0	98	23	Dead	38	White	Single (never married)	20	T3	N0	M1NOS	Alive or dead due to cancer	Dead (attributable to this cancer dx)	Yes	One primary only	Any Medicaid	Male
2010	209	Moderately differentiated; Grade II	Not a paired site	8140/3: Adenocarcinoma, NOS	IIIB	IIIB	50	Beam radiation	Yes	Radiation prior to surgery	999	8	0	65	Alive	59	White	Married (including common law)	20	T3	N1NOS	M0	Alive or dead due to cancer	Alive or dead of other cause	Yes	One primary only	Insured	Male
2011	209	Moderately differentiated; Grade II	Not a paired site	8140/3: Adenocarcinoma, NOS	IV	IVA	30	Beam radiation	Yes	Radiation after surgery	20	24	6	58	Alive	50	White	Single (never married)	20	T3	N2a	M1a	Alive or dead due to cancer	Alive or dead of other cause	Yes	One primary only	Insured	Female
2011	180	Moderately differentiated; Grade II	Not a paired site	8263/3: Adenocarcinoma in tubulovillous adenoma	I	I	40	None/Unknown	No/Unknown	No radiation and/or cancer-directed surgery	48	13	0	58	Alive	39	White	Single (never married)	10	T1	N0	M0	Alive or dead due to cancer	Alive or dead of other cause	Yes	One primary only	Any Medicaid	Female
2011	199	Moderately differentiated; Grade II	Not a paired site	8140/3: Adenocarcinoma, NOS	IV	IVNOS	30	Beam radiation	Yes	Radiation prior to surgery	54	22	10	59	Alive	40	White	Married (including common law)	20	T3	N2b	M1NOS	Alive or dead due to cancer	Alive or dead of other cause	Yes	One primary only	Insured/No specifics	Female
2011	187	Moderately differentiated; Grade II	Not a paired site	8140/3: Adenocarcinoma, NOS	IV	IVA	30	None/Unknown	Yes	No radiation and/or cancer-directed surgery	37	21	3	45	Dead	64	Asian or Pacific Islander	Married (including common law)	20	T3	N1b	M1a	Alive or dead due to cancer	Dead (attributable to this cancer dx)	Yes	One primary only	Any Medicaid	Male
2010	209	Moderately differentiated; Grade II	Not a paired site	8210/3: Adenocarcinoma in adenomatous polyp	IIIA	IIIA	30	None/Unknown	No/Unknown	No radiation and/or cancer-directed surgery	18	39	0	61	Alive	58	White	Single (never married)	10	T2	N1c	M0	Alive or dead due to cancer	Alive or dead of other cause	Yes	One primary only	Insured	Female
2010	187	Moderately differentiated; Grade II	Not a paired site	8140/3: Adenocarcinoma, NOS	IV	IVB	40	None/Unknown	Yes	No radiation and/or cancer-directed surgery	47	29	3	22	Dead	68	White	Married (including common law)	20	T4b	N1b	M1b	Alive or dead due to cancer	Dead (attributable to this cancer dx)	Yes	One primary only	Insured	Female
2010	186	Moderately differentiated; Grade II	Not a paired site	8140/3: Adenocarcinoma, NOS	IV	IVB	50	None/Unknown	Yes	No radiation and/or cancer-directed surgery	22	32	6	7	Dead	73	White	Married (including common law)	10	T3	N2a	M1b	Alive or dead due to cancer	Dead (attributable to this cancer dx)	Yes	1st of 2 or more primaries	Insured	Male
2010	180	Moderately differentiated; Grade II	Not a paired site	8140/3: Adenocarcinoma, NOS	IV	IVB	50	None/Unknown	Yes	No radiation and/or cancer-directed surgery	35	32	6	6	Dead	73	White	Married (including common law)	10	T4b	N2a	M1b	N/A not first tumor	N/A not first tumor	No	2nd of 2 or more primaries	Insured	Male
2010	199	Moderately differentiated; Grade II	Not a paired site	8140/3: Adenocarcinoma, NOS	IV	IVB	0	None/Unknown	Yes	No radiation and/or cancer-directed surgery	999	0	98	10	Dead	57	White	Married (including common law)	10	T1	N0	M1b	Alive or dead due to cancer	Dead (attributable to this cancer dx)	Yes	One primary only	Insured	Male
2011	180	Moderately differentiated; Grade II	Not a paired site	8140/3: Adenocarcinoma, NOS	IV	IVA	41	None/Unknown	Yes	No radiation and/or cancer-directed surgery	80	21	7	12	Dead	50	Black	Unknown	10	T4a	N2b	M1a	Alive or dead due to cancer	Dead (attributable to this cancer dx)	Yes	One primary only	Insured	Male
2011	186	Moderately differentiated; Grade II	Not a paired site	8140/3: Adenocarcinoma, NOS	IV	IVA	40	None/Unknown	Yes	No radiation and/or cancer-directed surgery	100	17	0	28	Dead	51	Asian or Pacific Islander	Married (including common law)	10	T3	N0	M1a	Alive or dead due to cancer	Dead (attributable to this cancer dx)	Yes	One primary only	Insured/No specifics	Female
2011	187	Moderately differentiated; Grade II	Not a paired site	8140/3: Adenocarcinoma, NOS	IV	IVB	30	None/Unknown	Yes	No radiation and/or cancer-directed surgery	40	12	0	53	Dead	64	White	Married (including common law)	10	T4a	N1c	M1b	Alive or dead due to cancer	Dead (attributable to this cancer dx)	Yes	One primary only	Insured/No specifics	Male
2010	180	Undifferentiated; anaplastic; Grade IV	Not a paired site	8480/3: Mucinous adenocarcinoma	IIIC	IIIC	40	None/Unknown	Yes	No radiation and/or cancer-directed surgery	50	25	10	12	Dead	64	White	Married (including common law)	20	T4a	N2b	M0	Alive or dead due to cancer	Dead (attributable to this cancer dx)	Yes	One primary only	Insured	Female
2010	187	Moderately differentiated; Grade II	Not a paired site	8140/3: Adenocarcinoma, NOS	IIIB	IIIB	30	None/Unknown	Yes	No radiation and/or cancer-directed surgery	75	18	1	62	Alive	34	Asian or Pacific Islander	Married (including common law)	20	T3	N1a	M0	Alive or dead due to cancer	Alive or dead of other cause	Yes	One primary only	Insured	Male
2010	187	Moderately differentiated; Grade II	Not a paired site	8140/3: Adenocarcinoma, NOS	IV	IVA	40	None/Unknown	Yes	No radiation and/or cancer-directed surgery	30	18	0	20	Dead	52	White	Married (including common law)	20	T3	N0	M1a	Alive or dead due to cancer	Dead (attributable to this cancer dx)	Yes	One primary only	Insured	Male
2011	209	Moderately differentiated; Grade II	Not a paired site	8140/3: Adenocarcinoma, NOS	IIIC	IIIC	30	Beam radiation	Yes	Radiation prior to surgery	50	12	8	30	Dead	39	Asian or Pacific Islander	Married (including common law)	10	T3	N2b	M0	Alive or dead due to cancer	Dead (attributable to this cancer dx)	Yes	One primary only	Insured	Male
2010	209	Unknown	Not a paired site	8140/3: Adenocarcinoma, NOS	IV	IVB	50	Beam radiation	Yes	Radiation prior to surgery	48	21	6	26	Dead	44	Asian or Pacific Islander	Widowed	10	T3	N2NOS	M1b	Alive or dead due to cancer	Dead (attributable to this cancer dx)	Yes	One primary only	Insured	Female
2010	184	Undifferentiated; anaplastic; Grade IV	Not a paired site	8480/3: Mucinous adenocarcinoma	IV	IVB	30	None/Unknown	Yes	No radiation and/or cancer-directed surgery	50	13	9	60	Alive	41	White	Married (including common law)	10	T4b	N2b	M1b	Alive or dead due to cancer	Alive or dead of other cause	Yes	1st of 2 or more primaries	Insured	Male
2011	187	Moderately differentiated; Grade II	Not a paired site	8140/3: Adenocarcinoma, NOS	IV	IVA	30	None/Unknown	Yes	No radiation and/or cancer-directed surgery	20	23	14	57	Alive	62	White	Married (including common law)	20	T3	N2b	M1a	Alive or dead due to cancer	Alive or dead of other cause	Yes	One primary only	Insured/No specifics	Male
2010	189	Unknown	Not a paired site	8140/3: Adenocarcinoma, NOS	IV	IVA	0	None/Unknown	Yes	No radiation and/or cancer-directed surgery	999	99	99	21	Dead	46	White	Single (never married)	20	TX	NX	M1a	Alive or dead due to cancer	Dead (attributable to this cancer dx)	Yes	One primary only	Insured	Female
2012	199	Unknown	Not a paired site	8140/3: Adenocarcinoma, NOS	IV	IVB	0	None/Unknown	Yes	No radiation and/or cancer-directed surgery	50	0	98	14	Dead	71	Asian or Pacific Islander	Married (including common law)	10	T3	N1NOS	M1b	N/A not first tumor	N/A not first tumor	Yes	2nd of 2 or more primaries	Any Medicaid	Female
2010	180	Unknown	Not a paired site	8263/3: Adenocarcinoma in tubulovillous adenoma	IV	IVB	0	None/Unknown	No/Unknown	No radiation and/or cancer-directed surgery	999	0	98	11	Dead	43	White	Married (including common law)	20	T1	NX	M1b	Alive or dead due to cancer	Dead (attributable to this cancer dx)	Yes	One primary only	Insured	Male
2010	184	Moderately differentiated; Grade II	Not a paired site	8140/3: Adenocarcinoma, NOS	IIIB	IIIB	40	None/Unknown	No/Unknown	No radiation and/or cancer-directed surgery	42	6	1	62	Alive	66	Black	Divorced	20	T3	N1a	M0	Alive or dead due to cancer	Alive or dead of other cause	Yes	One primary only	Insured/No specifics	Female
2011	187	Undifferentiated; anaplastic; Grade IV	Not a paired site	8140/3: Adenocarcinoma, NOS	IV	IVB	0	None/Unknown	Yes	No radiation and/or cancer-directed surgery	35	0	98	12	Dead	41	White	Married (including common law)	20	T1	NX	M1b	Alive or dead due to cancer	Dead (attributable to this cancer dx)	Yes	One primary only	Insured	Female
2011	199	Unknown	Not a paired site	8140/3: Adenocarcinoma, NOS	IV	IVA	0	None/Unknown	No/Unknown	No radiation and/or cancer-directed surgery	999	0	98	9	Dead	72	White	Divorced	20	TX	NX	M1a	N/A not first tumor	N/A not first tumor	Yes	2nd of 2 or more primaries	Any Medicaid	Female
2011	199	Poorly differentiated; Grade III	Not a paired site	8490/3: Signet ring cell carcinoma	IV	IVB	55	Beam radiation	Yes	Radiation after surgery	42	36	13	32	Dead	25	White	Single (never married)	20	T4a	N2b	M1b	Alive or dead due to cancer	Dead (attributable to this cancer dx)	Yes	One primary only	Insured	Male
2011	187	Moderately differentiated; Grade II	Not a paired site	8140/3: Adenocarcinoma, NOS	IV	IVA	40	None/Unknown	Yes	No radiation and/or cancer-directed surgery	70	18	2	23	Dead	51	Black	Divorced	10	T3	N1b	M1a	Alive or dead due to cancer	Dead (attributable to this cancer dx)	Yes	One primary only	Insured	Female
2010	180	Moderately differentiated; Grade II	Not a paired site	8140/3: Adenocarcinoma, NOS	IV	IVB	40	None/Unknown	Yes	No radiation and/or cancer-directed surgery	67	0	98	22	Dead	60	White	Married (including common law)	10	T4a	N2NOS	M1b	Alive or dead due to cancer	Dead (attributable to this cancer dx)	Yes	One primary only	Insured	Male
2011	185	Moderately differentiated; Grade II	Not a paired site	8140/3: Adenocarcinoma, NOS	IV	IVB	40	None/Unknown	Yes	No radiation and/or cancer-directed surgery	999	13	2	16	Dead	65	Black	Unmarried or Domestic Partner	10	T3	N1b	M1b	Alive or dead due to cancer	Dead (attributable to this cancer dx)	Yes	One primary only	Insured	Female
2011	187	Moderately differentiated; Grade II	Not a paired site	8140/3: Adenocarcinoma, NOS	IV	IVA	30	None/Unknown	Yes	No radiation and/or cancer-directed surgery	70	7	5	27	Dead	55	Asian or Pacific Islander	Married (including common law)	20	T4b	N2a	M1a	Alive or dead due to cancer	Dead (attributable to this cancer dx)	Yes	One primary only	Insured	Male
2011	187	Unknown	Not a paired site	8140/3: Adenocarcinoma, NOS	IV	IVA	0	None/Unknown	Yes	No radiation and/or cancer-directed surgery	999	0	98	30	Dead	54	White	Divorced	20	TX	N0	M1a	Alive or dead due to cancer	Dead (attributable to this cancer dx)	Yes	One primary only	Insured/No specifics	Male
2011	209	Unknown	Not a paired site	8140/3: Adenocarcinoma, NOS	IV	IVA	30	None/Unknown	Yes	No radiation and/or cancer-directed surgery	999	0	98	28	Dead	63	White	Married (including common law)	10	T1	N0	M1a	Alive or dead due to cancer	Dead (attributable to this cancer dx)	Yes	One primary only	Any Medicaid	Male
2011	186	Poorly differentiated; Grade III	Not a paired site	8140/3: Adenocarcinoma, NOS	IV	IVA	40	None/Unknown	Yes	No radiation and/or cancer-directed surgery	100	15	8	38	Dead	61	Black	Married (including common law)	20	T4b	N2b	M1a	Alive or dead due to cancer	Dead (attributable to this cancer dx)	Yes	One primary only	Insured	Male
2011	209	Moderately differentiated; Grade II	Not a paired site	8140/3: Adenocarcinoma, NOS	IIA	IIA	27	Beam radiation	Yes	Radiation before and after surgery	22	5	0	55	Alive	67	White	Single (never married)	20	T3	N0	M0	Alive or dead due to cancer	Alive or dead of other cause	Yes	One primary only	Insured	Male
2011	180	Moderately differentiated; Grade II	Not a paired site	8140/3: Adenocarcinoma, NOS	IIA	IIA	40	None/Unknown	No/Unknown	No radiation and/or cancer-directed surgery	42	21	0	45	Alive	59	White	Single (never married)	10	T3	N0	M0	Alive or dead due to cancer	Alive or dead of other cause	Yes	One primary only	Insured	Female
2011	199	Unknown	Not a paired site	8140/3: Adenocarcinoma, NOS	IV	IVB	0	None/Unknown	Yes	No radiation and/or cancer-directed surgery	112	0	98	7	Dead	46	Asian or Pacific Islander	Married (including common law)	20	T2	N0	M1b	Alive or dead due to cancer	Dead (attributable to this cancer dx)	Yes	One primary only	Insured/No specifics	Female
2011	182	Poorly differentiated; Grade III	Not a paired site	8140/3: Adenocarcinoma, NOS	IV	IVB	40	None/Unknown	Yes	No radiation and/or cancer-directed surgery	989	13	12	8	Dead	77	White	Married (including common law)	20	T4b	N2b	M1b	Alive or dead due to cancer	Dead (attributable to this cancer dx)	Yes	One primary only	Insured	Female
2011	199	Moderately differentiated; Grade II	Not a paired site	8140/3: Adenocarcinoma, NOS	IV	IVA	30	None/Unknown	Yes	No radiation and/or cancer-directed surgery	70	13	3	5	Dead	76	White	Divorced	20	T3	N1b	M1a	Alive or dead due to cancer	Dead (attributable to this cancer dx)	Yes	One primary only	Insured	Female
2011	180	Moderately differentiated; Grade II	Not a paired site	8140/3: Adenocarcinoma, NOS	IV	IVA	40	None/Unknown	Yes	No radiation and/or cancer-directed surgery	10	16	4	13	Dead	55	Black	Widowed	20	T3	N2a	M1a	Alive or dead due to cancer	Dead (attributable to this cancer dx)	Yes	One primary only	Any Medicaid	Female
2011	209	Well differentiated; Grade I	Not a paired site	8140/3: Adenocarcinoma, NOS	IIIA	IIIA	0	Beam radiation	No/Unknown	No radiation and/or cancer-directed surgery	80	0	98	25	Dead	81	Asian or Pacific Islander	Married (including common law)	10	T2	N1NOS	M0	Alive or dead due to cancer	Dead (attributable to this cancer dx)	Yes	One primary only	Insured	Male
2011	209	Moderately differentiated; Grade II	Not a paired site	8140/3: Adenocarcinoma, NOS	IV	IVB	30	None/Unknown	Yes	No radiation and/or cancer-directed surgery	50	22	0	59	Alive	60	White	Married (including common law)	20	T3	N1NOS	M1b	Alive or dead due to cancer	Alive or dead of other cause	Yes	One primary only	Insured	Male
2012	186	Poorly differentiated; Grade III	Not a paired site	8140/3: Adenocarcinoma, NOS	IV	IVB	0	None/Unknown	Yes	No radiation and/or cancer-directed surgery	999	0	98	13	Dead	62	White	Married (including common law)	10	T4NOS	N0	M1b	N/A not first tumor	N/A not first tumor	Yes	2nd of 2 or more primaries	Insured	Female
2011	182	Moderately differentiated; Grade II	Not a paired site	8140/3: Adenocarcinoma, NOS	IV	IVA	90	None/Unknown	Yes	No radiation and/or cancer-directed surgery	50	0	98	47	Dead	50	White	Married (including common law)	20	T3	N1NOS	M1a	Alive or dead due to cancer	Dead (attributable to this cancer dx)	Yes	One primary only	Insured	Male
2011	187	Moderately differentiated; Grade II	Not a paired site	8140/3: Adenocarcinoma, NOS	IV	IVA	30	None/Unknown	Yes	No radiation and/or cancer-directed surgery	55	18	18	39	Dead	44	Asian or Pacific Islander	Married (including common law)	20	T3	N2b	M1a	Alive or dead due to cancer	Dead (attributable to this cancer dx)	Yes	One primary only	Insured	Male
2011	209	Poorly differentiated; Grade III	Not a paired site	8210/3: Adenocarcinoma in adenomatous polyp	IV	IVA	0	None/Unknown	Yes	No radiation and/or cancer-directed surgery	34	0	98	10	Dead	32	White	Married (including common law)	20	T1	N1a	M1a	Alive or dead due to cancer	Dead (attributable to this cancer dx)	Yes	One primary only	Insured	Female
2011	209	Moderately differentiated; Grade II	Not a paired site	8140/3: Adenocarcinoma, NOS	IV	IVB	30	None/Unknown	Yes	No radiation and/or cancer-directed surgery	60	10	9	22	Dead	67	White	Single (never married)	20	T3	N2b	M1b	Alive or dead due to cancer	Dead (attributable to this cancer dx)	Yes	One primary only	Insured	Male
2011	184	Undifferentiated; anaplastic; Grade IV	Not a paired site	8140/3: Adenocarcinoma, NOS	IIIB	IIIB	40	None/Unknown	Yes	No radiation and/or cancer-directed surgery	999	50	1	18	Alive	68	White	Widowed	10	T3	N1a	M0	Alive or dead due to cancer	Alive or dead of other cause	Yes	1st of 2 or more primaries	Any Medicaid	Female
2011	182	Moderately differentiated; Grade II	Not a paired site	8480/3: Mucinous adenocarcinoma	IIIA	IIIA	40	None/Unknown	Yes	No radiation and/or cancer-directed surgery	34	50	1	18	Alive	68	White	Widowed	10	T1	N1a	M0	N/A not first tumor	N/A not first tumor	No	2nd of 2 or more primaries	Any Medicaid	Female
2011	182	Moderately differentiated; Grade II	Not a paired site	8140/3: Adenocarcinoma, NOS	IV	IVA	40	None/Unknown	Yes	No radiation and/or cancer-directed surgery	46	13	3	8	Alive	59	White	Widowed	10	T3	N1b	M1a	Alive or dead due to cancer	Alive or dead of other cause	Yes	One primary only	Uninsured	Female
2011	180	Moderately differentiated; Grade II	Not a paired site	8140/3: Adenocarcinoma, NOS	IV	IVA	30	None/Unknown	Yes	No radiation and/or cancer-directed surgery	130	17	0	16	Dead	61	Black	Single (never married)	20	T3	N0	M1a	Alive or dead due to cancer	Dead (attributable to this cancer dx)	Yes	One primary only	Insured/No specifics	Male
2011	186	Moderately differentiated; Grade II	Not a paired site	8140/3: Adenocarcinoma, NOS	IIA	IIA	30	None/Unknown	No/Unknown	No radiation and/or cancer-directed surgery	40	21	0	52	Alive	62	Asian or Pacific Islander	Married (including common law)	20	T3	N0	M0	Alive or dead due to cancer	Alive or dead of other cause	Yes	One primary only	Insured/No specifics	Female
2010	186	Well differentiated; Grade I	Not a paired site	8480/3: Mucinous adenocarcinoma	IV	IVB	40	None/Unknown	Yes	No radiation and/or cancer-directed surgery	45	3	1	15	Dead	66	White	Married (including common law)	20	T4a	N1a	M1b	Alive or dead due to cancer	Dead (attributable to this cancer dx)	Yes	One primary only	Insured	Male
2011	187	Moderately differentiated; Grade II	Not a paired site	8140/3: Adenocarcinoma, NOS	IV	IVB	0	None/Unknown	Yes	No radiation and/or cancer-directed surgery	60	0	98	37	Dead	79	White	Married (including common law)	20	T3	N1NOS	M1b	Alive or dead due to cancer	Dead (attributable to this cancer dx)	Yes	One primary only	Insured	Female
2011	209	Poorly differentiated; Grade III	Not a paired site	8140/3: Adenocarcinoma, NOS	IIIC	IIIC	30	None/Unknown	Yes	No radiation and/or cancer-directed surgery	999	34	11	55	Alive	52	White	Single (never married)	20	T3	N2b	M0	Alive or dead due to cancer	Alive or dead of other cause	Yes	1st of 2 or more primaries	Insured/No specifics	Male
2011	180	Well differentiated; Grade I	Not a paired site	8140/3: Adenocarcinoma, NOS	IV	IVB	0	None/Unknown	Yes	No radiation and/or cancer-directed surgery	70	0	98	51	Dead	40	White	Married (including common law)	10	T4b	NX	M1b	Alive or dead due to cancer	Dead (attributable to this cancer dx)	Yes	One primary only	Insured	Female
2011	187	Moderately differentiated; Grade II	Not a paired site	8140/3: Adenocarcinoma, NOS	IV	IVA	30	None/Unknown	Yes	No radiation and/or cancer-directed surgery	67	13	6	41	Dead	59	Black	Single (never married)	20	T3	N2a	M1a	Alive or dead due to cancer	Dead (attributable to this cancer dx)	Yes	One primary only	Insured/No specifics	Female
2011	180	Moderately differentiated; Grade II	Not a paired site	8263/3: Adenocarcinoma in tubulovillous adenoma	IV	IVA	30	None/Unknown	Yes	No radiation and/or cancer-directed surgery	45	27	7	42	Dead	60	Black	Married (including common law)	10	T4a	N2b	M1a	Alive or dead due to cancer	Dead (attributable to this cancer dx)	Yes	One primary only	Any Medicaid	Female
2011	189	Unknown	Not a paired site	8140/3: Adenocarcinoma, NOS	IV	IVB	0	None/Unknown	Yes	No radiation and/or cancer-directed surgery	999	0	98	6	Dead	73	Black	Widowed	20	TX	N0	M1b	Alive or dead due to cancer	Dead (attributable to this cancer dx)	Yes	One primary only	Any Medicaid	Female
2011	209	Undifferentiated; anaplastic; Grade IV	Not a paired site	8140/3: Adenocarcinoma, NOS	IIIB	IIIB	30	Beam radiation	Yes	Radiation prior to surgery	50	13	0	53	Alive	58	Asian or Pacific Islander	Single (never married)	20	T3	N1NOS	M0	Alive or dead due to cancer	Alive or dead of other cause	Yes	One primary only	Any Medicaid	Female
2011	180	Unknown	Not a paired site	8140/3: Adenocarcinoma, NOS	IV	IVB	27	None/Unknown	Yes	No radiation and/or cancer-directed surgery	24	0	98	36	Alive	68	Asian or Pacific Islander	Married (including common law)	10	T3	N1NOS	M1b	Alive or dead due to cancer	Alive or dead of other cause	Yes	One primary only	Any Medicaid	Male
2011	187	Moderately differentiated; Grade II	Not a paired site	8140/3: Adenocarcinoma, NOS	IV	IVA	30	None/Unknown	Yes	No radiation and/or cancer-directed surgery	35	27	1	52	Alive	78	White	Married (including common law)	20	T2	N1a	M1a	Alive or dead due to cancer	Alive or dead of other cause	Yes	One primary only	Insured	Male
2011	187	Moderately differentiated; Grade II	Not a paired site	8140/3: Adenocarcinoma, NOS	IIA	IIA	40	None/Unknown	No/Unknown	No radiation and/or cancer-directed surgery	25	10	0	25	Dead	68	Asian or Pacific Islander	Married (including common law)	10	T3	N0	M0	Alive or dead due to cancer	Dead (attributable to this cancer dx)	Yes	One primary only	Insured	Male
2011	186	Moderately differentiated; Grade II	Not a paired site	8140/3: Adenocarcinoma, NOS	IV	IVA	40	None/Unknown	Yes	No radiation and/or cancer-directed surgery	65	24	0	51	Alive	63	Asian or Pacific Islander	Divorced	10	T4a	N0	M1a	Alive or dead due to cancer	Alive or dead of other cause	Yes	One primary only	Insured	Male
2011	184	Moderately differentiated; Grade II	Not a paired site	8140/3: Adenocarcinoma, NOS	IIB	IIC	0	None/Unknown	Yes	No radiation and/or cancer-directed surgery	999	0	98	5	Dead	89	White	Married (including common law)	20	T4b	N0	M0	Alive or dead due to cancer	Dead (attributable to this cancer dx)	Yes	One primary only	Insured	Male
2011	187	Poorly differentiated; Grade III	Not a paired site	8490/3: Signet ring cell carcinoma	IV	IVB	40	None/Unknown	Yes	No radiation and/or cancer-directed surgery	40	0	98	15	Dead	43	White	Single (never married)	20	T1	NX	M1b	Alive or dead due to cancer	Dead (attributable to this cancer dx)	Yes	One primary only	Insured/No specifics	Male
2011	199	Moderately differentiated; Grade II	Not a paired site	8140/3: Adenocarcinoma, NOS	IV	IVA	30	None/Unknown	Yes	No radiation and/or cancer-directed surgery	52	16	1	27	Dead	42	White	Married (including common law)	10	T4a	N1a	M1a	Alive or dead due to cancer	Dead (attributable to this cancer dx)	Yes	One primary only	Insured/No specifics	Male
2011	182	Moderately differentiated; Grade II	Not a paired site	8140/3: Adenocarcinoma, NOS	IV	IVA	0	None/Unknown	Yes	No radiation and/or cancer-directed surgery	50	0	98	8	Dead	52	White	Single (never married)	20	TX	NX	M1a	Alive or dead due to cancer	Dead (attributable to this cancer dx)	Yes	One primary only	Insured/No specifics	Male
2011	209	Poorly differentiated; Grade III	Not a paired site	8140/3: Adenocarcinoma, NOS	IV	IVA	0	Beam radiation	Yes	No radiation and/or cancer-directed surgery	999	0	98	16	Dead	51	White	Married (including common law)	20	TX	N2NOS	M1a	Alive or dead due to cancer	Dead (attributable to this cancer dx)	Yes	One primary only	Insured/No specifics	Male
2011	187	Moderately differentiated; Grade II	Not a paired site	8140/3: Adenocarcinoma, NOS	IV	IVB	32	None/Unknown	Yes	No radiation and/or cancer-directed surgery	90	20	0	45	Dead	46	Asian or Pacific Islander	Separated	20	T4b	N0	M1b	Alive or dead due to cancer	Dead (attributable to this cancer dx)	Yes	One primary only	Insured	Male
2011	199	Moderately differentiated; Grade II	Not a paired site	8140/3: Adenocarcinoma, NOS	IIA	IIA	30	None/Unknown	Yes	No radiation and/or cancer-directed surgery	40	10	0	50	Alive	51	White	Married (including common law)	10	T3	N0	M0	Alive or dead due to cancer	Alive or dead of other cause	Yes	One primary only	Insured	Male
2011	184	Moderately differentiated; Grade II	Not a paired site	8140/3: Adenocarcinoma, NOS	IIIA	IIIA	30	None/Unknown	Yes	No radiation and/or cancer-directed surgery	22	32	3	51	Alive	61	White	Married (including common law)	20	T2	N1b	M0	Alive or dead due to cancer	Alive or dead of other cause	Yes	One primary only	Insured	Female
2012	199	Poorly differentiated; Grade III	Not a paired site	8140/3: Adenocarcinoma, NOS	IIIC	IIIB	30	Beam radiation	Yes	Radiation prior to surgery	80	13	4	40	Alive	73	Asian or Pacific Islander	Widowed	20	T2	N2a	M0	N/A not first tumor	N/A not first tumor	Yes	2nd of 2 or more primaries	Insured	Female
2011	199	Moderately differentiated; Grade II	Not a paired site	8140/3: Adenocarcinoma, NOS	IIIC	IIIC	30	None/Unknown	Yes	No radiation and/or cancer-directed surgery	999	39	9	29	Dead	88	White	Unknown	20	T3	N2b	M0	Alive or dead due to cancer	Dead (attributable to this cancer dx)	Yes	One primary only	Insured	Female
2010	189	Moderately differentiated; Grade II	Right - origin of primary	8140/3: Adenocarcinoma, NOS	UNK Stage	UNK Stage	80	None/Unknown	Yes	No radiation and/or cancer-directed surgery	31	25	3	60	Alive	63	Asian or Pacific Islander	Married (including common law)	10	T3	NX	M0	Alive or dead due to cancer	Alive or dead of other cause	Yes	One primary only	Insured	Male
2011	187	Unknown	Not a paired site	8140/3: Adenocarcinoma, NOS	IV	IVB	0	None/Unknown	Yes	No radiation and/or cancer-directed surgery	999	0	98	33	Dead	46	White	Single (never married)	20	TX	N0	M1b	Alive or dead due to cancer	Dead (attributable to this cancer dx)	Yes	One primary only	Insured	Male
2011	199	Unknown	Not a paired site	8140/3: Adenocarcinoma, NOS	IV	IVA	0	Beam radiation	Yes	No radiation and/or cancer-directed surgery	999	0	98	10	Dead	42	Asian or Pacific Islander	Married (including common law)	20	T1	N1NOS	M1a	Alive or dead due to cancer	Dead (attributable to this cancer dx)	Yes	One primary only	Insured	Male
2011	209	Well differentiated; Grade I	Not a paired site	8210/3: Adenocarcinoma in adenomatous polyp	IV	IVB	0	Beam radiation	Yes	No radiation and/or cancer-directed surgery	70	0	98	17	Dead	48	White	Married (including common law)	10	T3	N1NOS	M1b	Alive or dead due to cancer	Dead (attributable to this cancer dx)	Yes	One primary only	Insured	Male
2011	187	Unknown	Not a paired site	8210/3: Adenocarcinoma in adenomatous polyp	IV	IVB	0	None/Unknown	Yes	No radiation and/or cancer-directed surgery	999	0	98	27	Dead	42	White	Married (including common law)	20	TX	NX	M1b	Alive or dead due to cancer	Dead (attributable to this cancer dx)	Yes	One primary only	Insured	Male
2011	188	Moderately differentiated; Grade II	Not a paired site	8140/3: Adenocarcinoma, NOS	IIA	IIA	40	None/Unknown	No/Unknown	No radiation and/or cancer-directed surgery	50	27	0	49	Alive	65	White	Single (never married)	20	T3	N0	M0	Alive or dead due to cancer	Alive or dead of other cause	Yes	One primary only	Insured	Female
2011	209	Unknown	Not a paired site	8140/3: Adenocarcinoma, NOS	IV	IVB	0	Beam radiation	Yes	No radiation and/or cancer-directed surgery	999	0	98	4	Dead	46	White	Unknown	10	TX	N0	M1b	Alive or dead due to cancer	Dead (attributable to this cancer dx)	Yes	One primary only	Insured	Male
2011	199	Moderately differentiated; Grade II	Not a paired site	8140/3: Adenocarcinoma, NOS	IIIB	IIIB	30	None/Unknown	Yes	No radiation and/or cancer-directed surgery	45	18	1	45	Dead	73	White	Widowed	20	T4a	N1a	M0	Alive or dead due to cancer	Dead (attributable to this cancer dx)	Yes	One primary only	Insured	Female
2011	180	Moderately differentiated; Grade II	Not a paired site	8480/3: Mucinous adenocarcinoma	IV	IVB	50	None/Unknown	Yes	No radiation and/or cancer-directed surgery	50	14	12	7	Dead	90	White	Married (including common law)	10	T3	N2b	M1b	Alive or dead due to cancer	Dead (attributable to this cancer dx)	Yes	One primary only	Insured	Male
2011	180	Unknown	Not a paired site	8480/3: Mucinous adenocarcinoma	IV	IVB	0	None/Unknown	Yes	No radiation and/or cancer-directed surgery	28	0	98	47	Dead	68	Black	Widowed	10	TX	N0	M1b	Alive or dead due to cancer	Dead (attributable to this cancer dx)	Yes	One primary only	Insured	Female
2011	187	Poorly differentiated; Grade III	Not a paired site	8140/3: Adenocarcinoma, NOS	IV	IVB	0	None/Unknown	Yes	No radiation and/or cancer-directed surgery	100	0	98	4	Dead	65	Asian or Pacific Islander	Married (including common law)	10	T4b	N1NOS	M1b	Alive or dead due to cancer	Dead (attributable to this cancer dx)	Yes	One primary only	Insured/No specifics	Male
2011	186	Undifferentiated; anaplastic; Grade IV	Not a paired site	8140/3: Adenocarcinoma, NOS	IV	IVB	40	None/Unknown	Yes	No radiation and/or cancer-directed surgery	65	36	25	12	Dead	71	White	Married (including common law)	10	T3	N2b	M1b	Alive or dead due to cancer	Dead (attributable to this cancer dx)	Yes	One primary only	Any Medicaid	Male
2011	199	Moderately differentiated; Grade II	Not a paired site	8140/3: Adenocarcinoma, NOS	IIIB	IIIB	30	Beam radiation	Yes	Radiation after surgery	28	3	0	39	Dead	64	Asian or Pacific Islander	Married (including common law)	10	T3	N1c	M0	Alive or dead due to cancer	Dead (attributable to this cancer dx)	Yes	One primary only	Insured	Female
2011	180	Well differentiated; Grade I	Not a paired site	8140/3: Adenocarcinoma, NOS	I	I	40	None/Unknown	No/Unknown	No radiation and/or cancer-directed surgery	15	22	0	51	Alive	73	White	Widowed	10	T1	N0	M0	Alive or dead due to cancer	Alive or dead of other cause	Yes	One primary only	Insured	Female
2011	182	Moderately differentiated; Grade II	Not a paired site	8140/3: Adenocarcinoma, NOS	IIA	IIA	40	None/Unknown	No/Unknown	No radiation and/or cancer-directed surgery	65	20	0	48	Alive	84	Asian or Pacific Islander	Single (never married)	20	T3	N0	M0	Alive or dead due to cancer	Alive or dead of other cause	Yes	One primary only	Insured/No specifics	Female
2011	187	Moderately differentiated; Grade II	Not a paired site	8140/3: Adenocarcinoma, NOS	IIA	IIA	30	None/Unknown	No/Unknown	No radiation and/or cancer-directed surgery	42	16	0	42	Dead	72	Asian or Pacific Islander	Married (including common law)	20	T3	N0	M0	Alive or dead due to cancer	Dead (attributable to this cancer dx)	Yes	One primary only	Insured	Female
2011	184	Moderately differentiated; Grade II	Not a paired site	8140/3: Adenocarcinoma, NOS	IIA	IIA	40	None/Unknown	No/Unknown	No radiation and/or cancer-directed surgery	25	25	0	50	Alive	63	White	Married (including common law)	10	T3	N0	M0	Alive or dead due to cancer	Alive or dead of other cause	Yes	One primary only	Insured	Male
2011	180	Poorly differentiated; Grade III	Not a paired site	8140/3: Adenocarcinoma, NOS	IIIC	IIIC	40	None/Unknown	Yes	No radiation and/or cancer-directed surgery	50	78	7	39	Dead	46	White	Single (never married)	10	T4a	N2b	M0	Alive or dead due to cancer	Dead (attributable to this cancer dx)	Yes	One primary only	Insured/No specifics	Male
2011	183	Poorly differentiated; Grade III	Not a paired site	8140/3: Adenocarcinoma, NOS	IIIB	IIIB	40	None/Unknown	Yes	No radiation and/or cancer-directed surgery	60	15	2	51	Alive	63	White	Married (including common law)	20	T3	N1b	M0	Alive or dead due to cancer	Alive or dead of other cause	Yes	One primary only	Insured	Male
2011	209	Moderately differentiated; Grade II	Not a paired site	8140/3: Adenocarcinoma, NOS	IV	IVA	30	Beam radiation	Yes	Radiation prior to surgery	999	12	3	32	Dead	61	White	Married (including common law)	20	T3	N1b	M1a	Alive or dead due to cancer	Dead (attributable to this cancer dx)	Yes	One primary only	Insured	Male
2011	180	Moderately differentiated; Grade II	Not a paired site	8263/3: Adenocarcinoma in tubulovillous adenoma	IIIB	IIIB	40	None/Unknown	Yes	No radiation and/or cancer-directed surgery	89	20	1	51	Alive	66	Asian or Pacific Islander	Single (never married)	20	T4a	N1a	M0	Alive or dead due to cancer	Alive or dead of other cause	Yes	One primary only	Any Medicaid	Female
2011	209	Undifferentiated; anaplastic; Grade IV	Not a paired site	8255/3: Adenocarcinoma with mixed subtypes	IIIA	IIIA	30	Beam radiation	Yes	Radiation prior to surgery	80	21	1	21	Dead	46	Asian or Pacific Islander	Married (including common law)	20	T2	N1b	M0	Alive or dead due to cancer	Dead (attributable to this cancer dx)	Yes	One primary only	Any Medicaid	Female
2011	199	Moderately differentiated; Grade II	Not a paired site	8140/3: Adenocarcinoma, NOS	IIIB	IIIB	30	None/Unknown	Yes	No radiation and/or cancer-directed surgery	50	17	2	51	Alive	78	White	Married (including common law)	10	T3	N1b	M0	Alive or dead due to cancer	Alive or dead of other cause	Yes	One primary only	Insured/No specifics	Female
2011	209	Well differentiated; Grade I	Not a paired site	8140/3: Adenocarcinoma, NOS	IIA	IIA	30	None/Unknown	No/Unknown	No radiation and/or cancer-directed surgery	55	16	0	48	Alive	49	White	Divorced	10	T3	N0	M0	Alive or dead due to cancer	Alive or dead of other cause	Yes	One primary only	Insured	Female
2011	189	Unknown	Not a paired site	8140/3: Adenocarcinoma, NOS	IV	IVB	0	None/Unknown	Yes	No radiation and/or cancer-directed surgery	999	0	98	19	Dead	48	American Indian/Alaska Native	Single (never married)	10	TX	NX	M1b	Alive or dead due to cancer	Dead (attributable to this cancer dx)	Yes	One primary only	Any Medicaid	Male
2011	187	Unknown	Not a paired site	8140/3: Adenocarcinoma, NOS	IV	IVA	0	None/Unknown	No/Unknown	No radiation and/or cancer-directed surgery	999	0	98	12	Dead	60	White	Single (never married)	20	T1	N0	M1a	Alive or dead due to cancer	Dead (attributable to this cancer dx)	Yes	One primary only	Insured/No specifics	Male
2011	182	Moderately differentiated; Grade II	Not a paired site	8140/3: Adenocarcinoma, NOS	IV	IVB	40	None/Unknown	Yes	No radiation and/or cancer-directed surgery	50	27	5	15	Dead	81	White	Married (including common law)	20	T4b	N2a	M1b	Alive or dead due to cancer	Dead (attributable to this cancer dx)	Yes	One primary only	Insured/No specifics	Male
2011	183	Moderately differentiated; Grade II	Not a paired site	8140/3: Adenocarcinoma, NOS	IIIB	IIIB	30	None/Unknown	Yes	No radiation and/or cancer-directed surgery	80	7	1	55	Alive	68	White	Married (including common law)	20	T3	N1a	M0	Alive or dead due to cancer	Alive or dead of other cause	Yes	One primary only	Insured/No specifics	Male
2012	187	Moderately differentiated; Grade II	Not a paired site	8480/3: Mucinous adenocarcinoma	IV	IVA	41	None/Unknown	Yes	No radiation and/or cancer-directed surgery	89	25	16	21	Dead	49	White	Unknown	10	T4b	N2b	M1a	Alive or dead due to cancer	Dead (attributable to this cancer dx)	Yes	One primary only	Insured	Male
2012	187	Moderately differentiated; Grade II	Not a paired site	8140/3: Adenocarcinoma, NOS	IV	IVA	30	None/Unknown	Yes	No radiation and/or cancer-directed surgery	25	13	10	47	Alive	57	White	Married (including common law)	20	T3	N2b	M1a	Alive or dead due to cancer	Alive or dead of other cause	Yes	One primary only	Insured/No specifics	Male
2012	184	Unknown	Not a paired site	8140/3: Adenocarcinoma, NOS	IV	IVA	0	None/Unknown	No/Unknown	No radiation and/or cancer-directed surgery	999	0	98	5	Dead	58	White	Single (never married)	20	T4b	NX	M1a	Alive or dead due to cancer	Dead (attributable to this cancer dx)	Yes	One primary only	Any Medicaid	Female
2012	185	Moderately differentiated; Grade II	Not a paired site	8140/3: Adenocarcinoma, NOS	IIIC	IIIB	40	None/Unknown	Yes	No radiation and/or cancer-directed surgery	30	26	6	43	Alive	64	Asian or Pacific Islander	Married (including common law)	20	T3	N2a	M0	Alive or dead due to cancer	Alive or dead of other cause	Yes	One primary only	Insured	Male
2012	199	Moderately differentiated; Grade II	Not a paired site	8140/3: Adenocarcinoma, NOS	IIIC	IIIC	30	Beam radiation	Yes	Radiation after surgery	34	16	12	47	Alive	48	White	Married (including common law)	20	T3	N2b	M0	Alive or dead due to cancer	Alive or dead of other cause	Yes	1st of 2 or more primaries	Any Medicaid	Female
2011	209	Moderately differentiated; Grade II	Not a paired site	8140/3: Adenocarcinoma, NOS	IIINOS	IIINOS	30	None/Unknown	Yes	No radiation and/or cancer-directed surgery	999	98	97	57	Alive	48	White	Single (never married)	20	TX	N1NOS	M0	Alive or dead due to cancer	Alive or dead of other cause	Yes	One primary only	Any Medicaid	Male
2012	180	Unknown	Not a paired site	8140/3: Adenocarcinoma, NOS	IV	IVB	30	Radioactive implants	Yes	Radiation after surgery	999	97	97	16	Dead	53	Black	Single (never married)	10	T3	N2b	M1b	N/A not first tumor	N/A not first tumor	No	2nd of 2 or more primaries	Insured/No specifics	Male
2012	209	Moderately differentiated; Grade II	Not a paired site	8140/3: Adenocarcinoma, NOS	IV	IVA	50	Beam radiation	Yes	Radiation after surgery	40	13	0	46	Alive	36	White	Married (including common law)	20	T3	N1NOS	M1a	Alive or dead due to cancer	Alive or dead of other cause	Yes	One primary only	Insured/No specifics	Female
2012	199	Moderately differentiated; Grade II	Not a paired site	8140/3: Adenocarcinoma, NOS	IV	IVA	30	None/Unknown	Yes	No radiation and/or cancer-directed surgery	38	31	15	45	Alive	52	White	Married (including common law)	20	T4b	N2b	M1a	Alive or dead due to cancer	Alive or dead of other cause	Yes	One primary only	Insured	Male
2012	180	Poorly differentiated; Grade III	Not a paired site	8140/3: Adenocarcinoma, NOS	IV	IVB	41	None/Unknown	No/Unknown	No radiation and/or cancer-directed surgery	130	12	0	8	Dead	60	White	Married (including common law)	20	T4b	N0	M1b	Alive or dead due to cancer	Dead (attributable to this cancer dx)	Yes	One primary only	Insured/No specifics	Female
2012	184	Undifferentiated; anaplastic; Grade IV	Not a paired site	8140/3: Adenocarcinoma, NOS	IV	IVB	30	None/Unknown	Yes	No radiation and/or cancer-directed surgery	50	13	4	26	Dead	75	Asian or Pacific Islander	Divorced	10	T3	N2a	M1b	Alive or dead due to cancer	Dead (attributable to this cancer dx)	Yes	One primary only	Any Medicaid	Male
2012	199	Poorly differentiated; Grade III	Not a paired site	8263/3: Adenocarcinoma in tubulovillous adenoma	IV	IVA	0	Beam radiation	Yes	No radiation and/or cancer-directed surgery	999	0	98	13	Dead	51	White	Married (including common law)	10	T4b	N1NOS	M1a	Alive or dead due to cancer	Dead (attributable to this cancer dx)	Yes	One primary only	Insured	Female
2012	180	Moderately differentiated; Grade II	Not a paired site	8140/3: Adenocarcinoma, NOS	IV	IVA	40	None/Unknown	Yes	No radiation and/or cancer-directed surgery	100	21	2	36	Alive	79	Black	Married (including common law)	10	T4a	N1b	M1a	Alive or dead due to cancer	Alive or dead of other cause	Yes	One primary only	Insured	Male
2012	184	Poorly differentiated; Grade III	Not a paired site	8140/3: Adenocarcinoma, NOS	IV	IVA	40	None/Unknown	No/Unknown	No radiation and/or cancer-directed surgery	150	24	21	4	Dead	68	White	Single (never married)	20	T4b	N2b	M1a	Alive or dead due to cancer	Dead (attributable to this cancer dx)	Yes	One primary only	Insured/No specifics	Female
2012	209	Moderately differentiated; Grade II	Not a paired site	8140/3: Adenocarcinoma, NOS	IV	IVA	0	Beam radiation	Yes	No radiation and/or cancer-directed surgery	40	0	98	33	Dead	53	White	Single (never married)	20	TX	N0	M1a	Alive or dead due to cancer	Dead (attributable to this cancer dx)	Yes	One primary only	Insured	Male
2012	183	Unknown	Not a paired site	8140/3: Adenocarcinoma, NOS	IV	IVB	0	Beam radiation	Yes	No radiation and/or cancer-directed surgery	999	0	98	10	Dead	43	White	Single (never married)	20	T1	N0	M1b	Alive or dead due to cancer	Dead (attributable to this cancer dx)	Yes	One primary only	Insured	Female
2012	180	Poorly differentiated; Grade III	Not a paired site	8490/3: Signet ring cell carcinoma	IV	IVNOS	50	None/Unknown	No/Unknown	No radiation and/or cancer-directed surgery	42	13	3	10	Dead	87	White	Widowed	10	T4b	N1b	M1NOS	N/A not first tumor	N/A not first tumor	Yes	3rd of 3 or more primaries	Insured/No specifics	Female
2012	199	Moderately differentiated; Grade II	Not a paired site	8140/3: Adenocarcinoma, NOS	IV	IVB	0	None/Unknown	Yes	No radiation and/or cancer-directed surgery	93	0	98	9	Dead	35	White	Single (never married)	10	T4b	N1NOS	M1b	Alive or dead due to cancer	Dead (attributable to this cancer dx)	Yes	One primary only	Any Medicaid	Female
2012	187	Poorly differentiated; Grade III	Not a paired site	8140/3: Adenocarcinoma, NOS	IV	IVB	0	None/Unknown	Yes	No radiation and/or cancer-directed surgery	35	0	98	10	Dead	64	White	Married (including common law)	20	T1	N1NOS	M1b	Alive or dead due to cancer	Dead (attributable to this cancer dx)	Yes	One primary only	Insured/No specifics	Male
2012	188	Poorly differentiated; Grade III	Not a paired site	8480/3: Mucinous adenocarcinoma	IV	IVB	40	None/Unknown	Yes	No radiation and/or cancer-directed surgery	180	17	2	34	Dead	67	Black	Single (never married)	10	T4a	N1b	M1b	Alive or dead due to cancer	Dead (attributable to this cancer dx)	Yes	One primary only	Insured	Female
2012	187	Moderately differentiated; Grade II	Not a paired site	8140/3: Adenocarcinoma, NOS	IV	IVB	0	Beam radiation	Yes	No radiation and/or cancer-directed surgery	999	0	98	17	Dead	65	White	Single (never married)	20	T3	N0	M1b	Dead (attributable to causes other than this cancer dx)	Alive or dead of other cause	Yes	1st of 2 or more primaries	Insured/No specifics	Male
2012	209	Undifferentiated; anaplastic; Grade IV	Not a paired site	8480/3: Mucinous adenocarcinoma	IIIC	IIIB	50	Beam radiation	Yes	Radiation prior to surgery	30	15	6	18	Dead	62	White	Married (including common law)	10	T3	N2a	M0	Dead (attributable to causes other than this cancer dx)	Alive or dead of other cause	Yes	One primary only	Insured	Male
2012	183	Poorly differentiated; Grade III	Not a paired site	8140/3: Adenocarcinoma, NOS	IV	IVB	40	Beam radiation	Yes	Radiation after surgery	85	15	8	15	Dead	57	Asian or Pacific Islander	Single (never married)	10	T4a	N2b	M1b	Alive or dead due to cancer	Dead (attributable to this cancer dx)	Yes	One primary only	Insured	Male
2012	185	Poorly differentiated; Grade III	Not a paired site	8140/3: Adenocarcinoma, NOS	IIIB	IIIC	41	Beam radiation	Yes	Radiation after surgery	80	10	0	41	Alive	48	White	Married (including common law)	10	T4b	N1c	M0	Alive or dead due to cancer	Alive or dead of other cause	Yes	One primary only	Insured/No specifics	Female
2012	186	Moderately differentiated; Grade II	Not a paired site	8140/3: Adenocarcinoma, NOS	IIA	IIA	30	None/Unknown	Yes	No radiation and/or cancer-directed surgery	100	51	0	42	Dead	50	White	Married (including common law)	20	T3	N0	M0	Alive or dead due to cancer	Dead (attributable to this cancer dx)	Yes	One primary only	Insured	Female
2012	182	Moderately differentiated; Grade II	Not a paired site	8480/3: Mucinous adenocarcinoma	IIIB	IIIB	40	None/Unknown	Yes	No radiation and/or cancer-directed surgery	40	23	1	34	Dead	76	White	Married (including common law)	20	T4a	N1a	M0	Alive or dead due to cancer	Dead (attributable to this cancer dx)	Yes	One primary only	Insured	Female
2012	209	Moderately differentiated; Grade II	Not a paired site	8140/3: Adenocarcinoma, NOS	IV	IVA	0	None/Unknown	Yes	No radiation and/or cancer-directed surgery	55	0	98	19	Dead	74	Black	Widowed	20	T3	N0	M1a	Alive or dead due to cancer	Dead (attributable to this cancer dx)	Yes	One primary only	Insured	Female
2012	209	Moderately differentiated; Grade II	Not a paired site	8140/3: Adenocarcinoma, NOS	IIIC	IIIC	30	None/Unknown	Yes	No radiation and/or cancer-directed surgery	30	67	5	44	Alive	22	Asian or Pacific Islander	Married (including common law)	20	T4b	N1b	M0	Alive or dead due to cancer	Alive or dead of other cause	Yes	One primary only	Insured	Female
2012	184	Moderately differentiated; Grade II	Not a paired site	8480/3: Mucinous adenocarcinoma	IV	IVA	41	None/Unknown	Yes	No radiation and/or cancer-directed surgery	70	26	5	44	Alive	36	Asian or Pacific Islander	Married (including common law)	10	T4b	N2a	M1a	Alive or dead due to cancer	Alive or dead of other cause	Yes	One primary only	Insured	Male
2012	183	Moderately differentiated; Grade II	Not a paired site	8140/3: Adenocarcinoma, NOS	IV	IVB	0	None/Unknown	Yes	No radiation and/or cancer-directed surgery	999	0	98	34	Dead	45	Black	Unknown	20	TX	N0	M1b	Alive or dead due to cancer	Dead (attributable to this cancer dx)	Yes	One primary only	Insured	Male
2012	187	Unknown	Not a paired site	8140/3: Adenocarcinoma, NOS	IV	IVB	0	None/Unknown	Yes	No radiation and/or cancer-directed surgery	80	0	98	21	Dead	48	Asian or Pacific Islander	Married (including common law)	10	T1	N0	M1b	Alive or dead due to cancer	Dead (attributable to this cancer dx)	Yes	One primary only	Insured	Male
2012	180	Moderately differentiated; Grade II	Right - origin of primary	8480/3: Mucinous adenocarcinoma	IV	IVA	41	None/Unknown	Yes	No radiation and/or cancer-directed surgery	65	23	3	32	Dead	40	Black	Single (never married)	20	T4b	N1b	M1a	Alive or dead due to cancer	Dead (attributable to this cancer dx)	Yes	One primary only	Any Medicaid	Male
2012	187	Moderately differentiated; Grade II	Not a paired site	8140/3: Adenocarcinoma, NOS	IV	IVA	0	None/Unknown	Yes	No radiation and/or cancer-directed surgery	50	0	98	31	Dead	52	White	Divorced	20	T1	N0	M1a	Alive or dead due to cancer	Dead (attributable to this cancer dx)	Yes	One primary only	Any Medicaid	Male
2012	180	Moderately differentiated; Grade II	Not a paired site	8140/3: Adenocarcinoma, NOS	IV	IVA	40	None/Unknown	Yes	No radiation and/or cancer-directed surgery	95	14	1	43	Alive	78	White	Single (never married)	10	T3	N1a	M1a	Alive or dead due to cancer	Alive or dead of other cause	Yes	One primary only	Insured/No specifics	Female
2012	182	Moderately differentiated; Grade II	Not a paired site	8140/3: Adenocarcinoma, NOS	IV	IVA	0	Beam radiation	Yes	Radiation before and after surgery	60	0	98	44	Alive	46	White	Married (including common law)	20	TX	NX	M1a	Alive or dead due to cancer	Alive or dead of other cause	Yes	1st of 2 or more primaries	Insured/No specifics	Male
2012	209	Moderately differentiated; Grade II	Not a paired site	8140/3: Adenocarcinoma, NOS	IV	IVA	0	Beam radiation	Yes	Radiation prior to surgery	40	0	98	44	Alive	46	White	Married (including common law)	20	TX	NX	M1a	N/A not first tumor	N/A not first tumor	Yes	2nd of 2 or more primaries	Insured/No specifics	Male
2012	180	Moderately differentiated; Grade II	Right - origin of primary	8263/3: Adenocarcinoma in tubulovillous adenoma	IIIB	IIIB	40	None/Unknown	Yes	No radiation and/or cancer-directed surgery	46	19	1	42	Alive	71	White	Widowed	10	T3	N1a	M0	Alive or dead due to cancer	Alive or dead of other cause	Yes	One primary only	Insured	Female
2012	187	Poorly differentiated; Grade III	Not a paired site	8140/3: Adenocarcinoma, NOS	IIIB	IIIB	30	None/Unknown	Yes	No radiation and/or cancer-directed surgery	999	14	1	12	Dead	70	Asian or Pacific Islander	Married (including common law)	20	T4a	N1a	M0	Alive or dead due to cancer	Dead (attributable to this cancer dx)	Yes	One primary only	Insured	Male
2012	186	Well differentiated; Grade I	Left - origin of primary	8261/3: Adenocarcinoma in villous adenoma	IV	IVA	40	None/Unknown	Yes	No radiation and/or cancer-directed surgery	33	16	5	38	Alive	69	White	Widowed	10	T3	N2a	M1a	Alive or dead due to cancer	Alive or dead of other cause	Yes	One primary only	Insured/No specifics	Female
2012	209	Moderately differentiated; Grade II	Not a paired site	8140/3: Adenocarcinoma, NOS	IIB	IIC	50	Beam radiation	Yes	Radiation prior to surgery	60	15	0	35	Dead	64	White	Divorced	10	T4b	N0	M0	Alive or dead due to cancer	Dead (attributable to this cancer dx)	Yes	One primary only	Insured/No specifics	Female
2012	186	Poorly differentiated; Grade III	Not a paired site	8140/3: Adenocarcinoma, NOS	IV	IVB	30	None/Unknown	Yes	No radiation and/or cancer-directed surgery	140	7	6	13	Dead	76	White	Married (including common law)	20	T4a	N2a	M1b	Alive or dead due to cancer	Dead (attributable to this cancer dx)	Yes	One primary only	Insured	Male
2012	187	Poorly differentiated; Grade III	Not a paired site	8140/3: Adenocarcinoma, NOS	IV	IVB	30	None/Unknown	Yes	No radiation and/or cancer-directed surgery	50	29	17	26	Dead	41	White	Married (including common law)	20	T4a	N2b	M1b	Alive or dead due to cancer	Dead (attributable to this cancer dx)	Yes	One primary only	Insured	Male
2012	180	Moderately differentiated; Grade II	Not a paired site	8140/3: Adenocarcinoma, NOS	IIB	IIB	40	None/Unknown	Yes	No radiation and/or cancer-directed surgery	40	28	0	40	Alive	50	White	Divorced	20	T4a	N0	M0	Alive or dead due to cancer	Alive or dead of other cause	Yes	One primary only	Insured	Female
2012	180	Unknown	Not a paired site	8140/3: Adenocarcinoma, NOS	IV	IVB	0	Beam radiation	No/Unknown	No radiation and/or cancer-directed surgery	45	0	98	7	Dead	79	Asian or Pacific Islander	Married (including common law)	10	T3	N1NOS	M1b	Alive or dead due to cancer	Dead (attributable to this cancer dx)	Yes	One primary only	Any Medicaid	Female
2012	187	Moderately differentiated; Grade II	Not a paired site	8480/3: Mucinous adenocarcinoma	IIIC	IIIB	30	None/Unknown	Yes	No radiation and/or cancer-directed surgery	40	18	6	43	Alive	74	White	Single (never married)	10	T3	N2a	M0	Alive or dead due to cancer	Alive or dead of other cause	Yes	One primary only	Insured/No specifics	Male
2012	180	Moderately differentiated; Grade II	Not a paired site	8140/3: Adenocarcinoma, NOS	IV	IVB	0	None/Unknown	Yes	No radiation and/or cancer-directed surgery	20	0	98	5	Dead	76	White	Married (including common law)	10	T1	N0	M1b	Alive or dead due to cancer	Dead (attributable to this cancer dx)	Yes	One primary only	Insured	Male
2012	180	Poorly differentiated; Grade III	Not a paired site	8140/3: Adenocarcinoma, NOS	IV	IVA	40	None/Unknown	Yes	No radiation and/or cancer-directed surgery	60	21	3	40	Alive	70	White	Divorced	10	T3	N1b	M1a	Alive or dead due to cancer	Alive or dead of other cause	Yes	One primary only	Insured	Female
2012	187	Moderately differentiated; Grade II	Not a paired site	8140/3: Adenocarcinoma, NOS	IV	IVB	32	None/Unknown	Yes	No radiation and/or cancer-directed surgery	60	15	4	22	Dead	61	White	Married (including common law)	10	T4b	N2a	M1b	Alive or dead due to cancer	Dead (attributable to this cancer dx)	Yes	One primary only	Insured	Female
2012	209	Moderately differentiated; Grade II	Not a paired site	8140/3: Adenocarcinoma, NOS	IV	IVB	50	Beam radiation	Yes	Radiation prior to surgery	25	12	0	43	Alive	65	White	Unknown	10	T3	N0	M1b	Alive or dead due to cancer	Alive or dead of other cause	Yes	One primary only	Insured	Male
2012	209	Unknown	Not a paired site	8140/3: Adenocarcinoma, NOS	IV	IVA	50	None/Unknown	Yes	No radiation and/or cancer-directed surgery	102	17	0	39	Alive	44	White	Single (never married)	20	T3	N1NOS	M1a	Alive or dead due to cancer	Alive or dead of other cause	Yes	One primary only	Any Medicaid	Male
2012	199	Moderately differentiated; Grade II	Not a paired site	8140/3: Adenocarcinoma, NOS	IV	IVB	30	None/Unknown	Yes	No radiation and/or cancer-directed surgery	38	13	7	27	Dead	43	White	Unknown	20	T4a	N2b	M1b	Alive or dead due to cancer	Dead (attributable to this cancer dx)	Yes	One primary only	Insured	Male
2012	180	Moderately differentiated; Grade II	Not a paired site	8140/3: Adenocarcinoma, NOS	IV	IVA	40	None/Unknown	Yes	No radiation and/or cancer-directed surgery	50	12	4	38	Alive	47	White	Married (including common law)	10	T1	N1NOS	M1a	Alive or dead due to cancer	Alive or dead of other cause	Yes	One primary only	Insured	Female
2011	184	Poorly differentiated; Grade III	Not a paired site	8490/3: Signet ring cell carcinoma	IIIC	IIIC	40	None/Unknown	No/Unknown	No radiation and/or cancer-directed surgery	35	28	7	4	Dead	75	White	Married (including common law)	10	T4b	N2b	M0	Alive or dead due to cancer	Dead (attributable to this cancer dx)	Yes	One primary only	Insured	Male
2012	184	Moderately differentiated; Grade II	Not a paired site	8140/3: Adenocarcinoma, NOS	IV	IVB	0	None/Unknown	Yes	No radiation and/or cancer-directed surgery	57	0	98	15	Dead	52	White	Single (never married)	10	T4b	N1NOS	M1b	Alive or dead due to cancer	Dead (attributable to this cancer dx)	Yes	One primary only	Insured	Female
2010	186	Unknown	Not a paired site	8140/3: Adenocarcinoma, NOS	IV	IVA	0	None/Unknown	Yes	No radiation and/or cancer-directed surgery	40	95	95	45	Dead	62	White	Divorced	10	T4a	N2NOS	M1a	Alive or dead due to cancer	Dead (attributable to this cancer dx)	Yes	One primary only	Insured	Male
2012	180	Poorly differentiated; Grade III	Not a paired site	8140/3: Adenocarcinoma, NOS	IV	IVB	40	None/Unknown	Yes	No radiation and/or cancer-directed surgery	30	37	3	39	Alive	37	White	Married (including common law)	10	T4b	N1b	M1b	Alive or dead due to cancer	Alive or dead of other cause	Yes	One primary only	Insured	Female
2012	180	Moderately differentiated; Grade II	Not a paired site	8480/3: Mucinous adenocarcinoma	IV	IVA	40	None/Unknown	Yes	No radiation and/or cancer-directed surgery	50	13	13	31	Dead	57	White	Divorced	20	T4b	N2b	M1a	Alive or dead due to cancer	Dead (attributable to this cancer dx)	Yes	One primary only	Insured	Female
2012	199	Poorly differentiated; Grade III	Not a paired site	8490/3: Signet ring cell carcinoma	IV	IVNOS	0	None/Unknown	Yes	No radiation and/or cancer-directed surgery	999	0	98	15	Dead	61	White	Single (never married)	20	T4b	N0	M1NOS	Alive or dead due to cancer	Dead (attributable to this cancer dx)	Yes	One primary only	Insured	Female
2012	183	Moderately differentiated; Grade II	Not a paired site	8480/3: Mucinous adenocarcinoma	IV	IVA	40	None/Unknown	Yes	No radiation and/or cancer-directed surgery	45	15	1	38	Alive	82	White	Married (including common law)	10	T3	N1a	M1a	Alive or dead due to cancer	Alive or dead of other cause	Yes	One primary only	Insured	Male
2012	182	Moderately differentiated; Grade II	Not a paired site	8140/3: Adenocarcinoma, NOS	IV	IVA	30	None/Unknown	Yes	No radiation and/or cancer-directed surgery	50	13	9	21	Dead	55	White	Married (including common law)	10	T3	N2b	M1a	Alive or dead due to cancer	Dead (attributable to this cancer dx)	Yes	One primary only	Insured	Male
2012	209	Unknown	Not a paired site	8140/3: Adenocarcinoma, NOS	IV	IVA	0	None/Unknown	Yes	No radiation and/or cancer-directed surgery	97	0	98	6	Dead	46	White	Single (never married)	10	T1	NX	M1a	Alive or dead due to cancer	Dead (attributable to this cancer dx)	Yes	One primary only	Insured	Female
2012	187	Undifferentiated; anaplastic; Grade IV	Not a paired site	8140/3: Adenocarcinoma, NOS	IV	IVB	70	None/Unknown	Yes	No radiation and/or cancer-directed surgery	90	8	6	5	Dead	63	Asian or Pacific Islander	Married (including common law)	10	T4b	N2a	M1b	Alive or dead due to cancer	Dead (attributable to this cancer dx)	Yes	One primary only	Insured	Female
2012	199	Moderately differentiated; Grade II	Not a paired site	8140/3: Adenocarcinoma, NOS	IV	IVA	30	None/Unknown	Yes	No radiation and/or cancer-directed surgery	90	19	0	27	Dead	55	Black	Single (never married)	10	T3	N0	M1a	Alive or dead due to cancer	Dead (attributable to this cancer dx)	Yes	One primary only	Any Medicaid	Male
2012	184	Moderately differentiated; Grade II	Not a paired site	8480/3: Mucinous adenocarcinoma	IIA	IIA	40	None/Unknown	Yes	No radiation and/or cancer-directed surgery	70	74	0	38	Alive	47	Asian or Pacific Islander	Married (including common law)	20	T3	N0	M0	Alive or dead due to cancer	Alive or dead of other cause	Yes	One primary only	Insured	Female
2012	180	Moderately differentiated; Grade II	Not a paired site	8140/3: Adenocarcinoma, NOS	IV	IVA	40	None/Unknown	No/Unknown	No radiation and/or cancer-directed surgery	65	21	8	9	Alive	62	White	Divorced	10	T3	N2b	M1a	Alive or dead due to cancer	Alive or dead of other cause	Yes	One primary only	Insured	Female
2012	182	Moderately differentiated; Grade II	Not a paired site	8480/3: Mucinous adenocarcinoma	IIIC	IIIC	40	None/Unknown	Yes	No radiation and/or cancer-directed surgery	34	20	9	19	Dead	60	Asian or Pacific Islander	Married (including common law)	10	T4a	N2b	M0	Alive or dead due to cancer	Dead (attributable to this cancer dx)	Yes	One primary only	Insured	Male
2012	187	Moderately differentiated; Grade II	Not a paired site	8140/3: Adenocarcinoma, NOS	IV	IVB	30	None/Unknown	Yes	No radiation and/or cancer-directed surgery	40	16	4	9	Dead	86	White	Widowed	20	T3	N2a	M1b	Alive or dead due to cancer	Dead (attributable to this cancer dx)	Yes	One primary only	Any Medicaid	Female
2012	199	Moderately differentiated; Grade II	Left - origin of primary	8140/3: Adenocarcinoma, NOS	IIIB	IIIB	30	None/Unknown	Yes	No radiation and/or cancer-directed surgery	28	21	2	40	Alive	70	White	Married (including common law)	20	T3	N1b	M0	Alive or dead due to cancer	Alive or dead of other cause	Yes	One primary only	Insured	Female
2012	187	Moderately differentiated; Grade II	Not a paired site	8140/3: Adenocarcinoma, NOS	IV	IVA	30	None/Unknown	Yes	No radiation and/or cancer-directed surgery	35	27	7	40	Alive	52	White	Married (including common law)	20	T4b	N2b	M1a	Alive or dead due to cancer	Alive or dead of other cause	Yes	One primary only	Insured	Male
2012	180	Moderately differentiated; Grade II	Not a paired site	8140/3: Adenocarcinoma, NOS	IV	IVA	40	None/Unknown	Yes	No radiation and/or cancer-directed surgery	60	25	16	17	Dead	71	White	Married (including common law)	10	T4b	N2b	M1a	Alive or dead due to cancer	Dead (attributable to this cancer dx)	Yes	One primary only	Insured/No specifics	Male
2012	187	Moderately differentiated; Grade II	Not a paired site	8140/3: Adenocarcinoma, NOS	IV	IVB	0	None/Unknown	Yes	No radiation and/or cancer-directed surgery	999	0	98	11	Dead	38	White	Married (including common law)	20	TX	N1NOS	M1b	Alive or dead due to cancer	Dead (attributable to this cancer dx)	Yes	One primary only	Insured	Male
2012	187	Moderately differentiated; Grade II	Not a paired site	8140/3: Adenocarcinoma, NOS	IV	IVB	30	None/Unknown	Yes	No radiation and/or cancer-directed surgery	60	12	4	14	Dead	70	Black	Unknown	10	T4a	N2a	M1b	N/A not first tumor	N/A not first tumor	Yes	2nd of 2 or more primaries	Insured	Male
2012	209	Moderately differentiated; Grade II	Not a paired site	8140/3: Adenocarcinoma, NOS	IV	IVA	30	None/Unknown	No/Unknown	No radiation and/or cancer-directed surgery	48	14	0	39	Alive	81	White	Married (including common law)	10	T2	N0	M1a	Alive or dead due to cancer	Alive or dead of other cause	Yes	One primary only	Insured/No specifics	Male
2012	185	Moderately differentiated; Grade II	Not a paired site	8140/3: Adenocarcinoma, NOS	IV	IVA	41	None/Unknown	Yes	No radiation and/or cancer-directed surgery	45	20	19	17	Dead	84	Asian or Pacific Islander	Widowed	10	T4b	N2b	M1a	Alive or dead due to cancer	Dead (attributable to this cancer dx)	Yes	One primary only	Insured	Female
2012	199	Moderately differentiated; Grade II	Not a paired site	8140/3: Adenocarcinoma, NOS	IIIB	IIIB	30	Beam radiation	Yes	Radiation prior to surgery	80	0	98	41	Alive	63	Asian or Pacific Islander	Married (including common law)	10	T3	N1b	M0	Alive or dead due to cancer	Alive or dead of other cause	Yes	One primary only	Insured	Male
2012	183	Moderately differentiated; Grade II	Not a paired site	8140/3: Adenocarcinoma, NOS	IV	IVA	40	None/Unknown	Yes	No radiation and/or cancer-directed surgery	70	15	4	38	Alive	40	Black	Single (never married)	20	T4a	N2a	M1a	Alive or dead due to cancer	Alive or dead of other cause	Yes	One primary only	Any Medicaid	Female
2012	209	Unknown	Not a paired site	8140/3: Adenocarcinoma, NOS	IV	IVA	0	Beam radiation	No/Unknown	Radiation after surgery	126	0	98	8	Dead	59	White	Unknown	10	T4b	N0	M1a	Alive or dead due to cancer	Dead (attributable to this cancer dx)	Yes	One primary only	Insured	Female
2012	183	Poorly differentiated; Grade III	Not a paired site	8140/3: Adenocarcinoma, NOS	IV	IVA	41	None/Unknown	Yes	No radiation and/or cancer-directed surgery	82	28	13	36	Alive	45	Asian or Pacific Islander	Divorced	20	T4a	N2b	M1a	Alive or dead due to cancer	Alive or dead of other cause	Yes	One primary only	Insured	Male
2012	209	Moderately differentiated; Grade II	Not a paired site	8140/3: Adenocarcinoma, NOS	IV	IVB	0	None/Unknown	No/Unknown	No radiation and/or cancer-directed surgery	90	1	0	8	Dead	53	White	Single (never married)	20	T4b	N0	M1b	Alive or dead due to cancer	Dead (attributable to this cancer dx)	Yes	One primary only	Insured	Female
2012	187	Moderately differentiated; Grade II	Not a paired site	8140/3: Adenocarcinoma, NOS	IV	IVA	30	None/Unknown	Yes	No radiation and/or cancer-directed surgery	60	15	3	10	Dead	55	White	Single (never married)	20	T3	N1b	M1a	Alive or dead due to cancer	Dead (attributable to this cancer dx)	Yes	One primary only	Insured	Female
2012	182	Moderately differentiated; Grade II	Not a paired site	8140/3: Adenocarcinoma, NOS	IIIB	IIIB	41	None/Unknown	Yes	No radiation and/or cancer-directed surgery	15	18	1	39	Alive	56	Black	Single (never married)	20	T3	N1a	M0	Alive or dead due to cancer	Alive or dead of other cause	Yes	One primary only	Any Medicaid	Male
2012	180	Moderately differentiated; Grade II	Not a paired site	8140/3: Adenocarcinoma, NOS	IIIC	IIIC	40	None/Unknown	Yes	No radiation and/or cancer-directed surgery	20	17	8	41	Alive	65	White	Married (including common law)	10	T3	N2b	M0	Alive or dead due to cancer	Alive or dead of other cause	Yes	One primary only	Insured	Male
2012	187	Poorly differentiated; Grade III	Not a paired site	8255/3: Adenocarcinoma with mixed subtypes	IV	IVB	0	None/Unknown	Yes	No radiation and/or cancer-directed surgery	999	0	98	18	Dead	38	Asian or Pacific Islander	Married (including common law)	20	TX	N0	M1b	Alive or dead due to cancer	Dead (attributable to this cancer dx)	Yes	One primary only	Insured	Female
2012	189	Unknown	Not a paired site	8140/3: Adenocarcinoma, NOS	IV	IVA	0	None/Unknown	Yes	No radiation and/or cancer-directed surgery	999	0	98	8	Dead	88	White	Divorced	20	TX	N0	M1a	Alive or dead due to cancer	Dead (attributable to this cancer dx)	Yes	One primary only	Any Medicaid	Female
2012	180	Moderately differentiated; Grade II	Not a paired site	8140/3: Adenocarcinoma, NOS	IIIC	IIIB	40	None/Unknown	No/Unknown	No radiation and/or cancer-directed surgery	50	15	4	17	Dead	67	Asian or Pacific Islander	Married (including common law)	10	T3	N2a	M0	Alive or dead due to cancer	Dead (attributable to this cancer dx)	Yes	One primary only	Any Medicaid	Male
2012	209	Unknown	Not a paired site	8140/3: Adenocarcinoma, NOS	UNK Stage	IIIB	50	None/Unknown	Yes	No radiation and/or cancer-directed surgery	20	99	99	13	Dead	62	White	Married (including common law)	20	T3	N1NOS	M0	Alive or dead due to cancer	Dead (attributable to this cancer dx)	Yes	One primary only	Insured	Female
2012	187	Unknown	Not a paired site	8140/3: Adenocarcinoma, NOS	IV	IVA	0	None/Unknown	Yes	No radiation and/or cancer-directed surgery	35	0	98	17	Dead	68	Black	Divorced	10	TX	N1NOS	M1a	Alive or dead due to cancer	Dead (attributable to this cancer dx)	Yes	One primary only	Insured	Male
2012	182	Well differentiated; Grade I	Not a paired site	8140/3: Adenocarcinoma, NOS	IIA	IIA	40	None/Unknown	No/Unknown	No radiation and/or cancer-directed surgery	52	16	0	37	Alive	74	White	Unknown	10	T3	N0	M0	Alive or dead due to cancer	Alive or dead of other cause	Yes	One primary only	Insured	Female
2012	180	Undifferentiated; anaplastic; Grade IV	Not a paired site	8140/3: Adenocarcinoma, NOS	IIIC	IIIC	30	None/Unknown	Yes	No radiation and/or cancer-directed surgery	35	18	7	17	Dead	50	White	Single (never married)	10	T4a	N2b	M0	Alive or dead due to cancer	Dead (attributable to this cancer dx)	Yes	One primary only	Insured	Male
2012	199	Moderately differentiated; Grade II	Not a paired site	8140/3: Adenocarcinoma, NOS	IV	IVA	30	None/Unknown	Yes	No radiation and/or cancer-directed surgery	21	16	0	39	Alive	38	Asian or Pacific Islander	Single (never married)	10	T4a	N0	M1a	Alive or dead due to cancer	Alive or dead of other cause	Yes	One primary only	Insured	Female
2012	180	Moderately differentiated; Grade II	Not a paired site	8140/3: Adenocarcinoma, NOS	IV	IVA	40	None/Unknown	Yes	No radiation and/or cancer-directed surgery	112	30	1	13	Dead	74	White	Widowed	10	T4a	N1a	M1a	Alive or dead due to cancer	Dead (attributable to this cancer dx)	Yes	One primary only	Insured/No specifics	Female
2012	180	Moderately differentiated; Grade II	Not a paired site	8140/3: Adenocarcinoma, NOS	I	I	30	None/Unknown	No/Unknown	No radiation and/or cancer-directed surgery	999	19	0	22	Dead	53	White	Married (including common law)	10	T2	N0	M0	Alive or dead due to cancer	Dead (attributable to this cancer dx)	Yes	One primary only	Any Medicaid	Male
2012	209	Moderately differentiated; Grade II	Not a paired site	8140/3: Adenocarcinoma, NOS	IV	IVB	30	Beam radiation	Yes	Radiation after surgery	50	0	98	39	Dead	43	Asian or Pacific Islander	Married (including common law)	20	T1	N1NOS	M1b	Alive or dead due to cancer	Dead (attributable to this cancer dx)	Yes	One primary only	Insured	Female
2012	189	Moderately differentiated; Grade II	Not a paired site	8140/3: Adenocarcinoma, NOS	IV	IVB	40	None/Unknown	Yes	No radiation and/or cancer-directed surgery	92	10	5	18	Dead	47	White	Married (including common law)	10	TX	N2a	M1b	Alive or dead due to cancer	Dead (attributable to this cancer dx)	Yes	One primary only	Insured/No specifics	Female
2012	182	Undifferentiated; anaplastic; Grade IV	Right - origin of primary	8263/3: Adenocarcinoma in tubulovillous adenoma	IV	IVA	41	None/Unknown	Yes	No radiation and/or cancer-directed surgery	30	22	1	36	Alive	38	White	Married (including common law)	10	T3	N1a	M1a	Alive or dead due to cancer	Alive or dead of other cause	Yes	One primary only	Insured	Female
2012	180	Unknown	Not a paired site	8140/3: Adenocarcinoma, NOS	IV	IVB	0	None/Unknown	Yes	No radiation and/or cancer-directed surgery	50	0	98	29	Dead	86	Black	Married (including common law)	10	TX	N1NOS	M1b	Alive or dead due to cancer	Dead (attributable to this cancer dx)	Yes	One primary only	Insured	Male
2011	186	Moderately differentiated; Grade II	Not a paired site	8140/3: Adenocarcinoma, NOS	IV	IVA	40	None/Unknown	Yes	No radiation and/or cancer-directed surgery	38	20	6	23	Dead	82	White	Married (including common law)	20	T3	N2a	M1a	N/A not first tumor	N/A not first tumor	Yes	2nd of 2 or more primaries	Insured/No specifics	Female
2012	199	Moderately differentiated; Grade II	Not a paired site	8140/3: Adenocarcinoma, NOS	IIB	IIB	30	None/Unknown	Yes	No radiation and/or cancer-directed surgery	999	20	0	37	Alive	45	White	Single (never married)	20	T4a	N0	M0	Alive or dead due to cancer	Alive or dead of other cause	Yes	One primary only	Any Medicaid	Male
2012	209	Unknown	Not a paired site	8140/3: Adenocarcinoma, NOS	IIA	IIA	0	Beam radiation	Yes	No radiation and/or cancer-directed surgery	50	0	98	37	Alive	60	White	Widowed	20	T3	N0	M0	Alive or dead due to cancer	Alive or dead of other cause	Yes	One primary only	Insured	Female
2012	182	Poorly differentiated; Grade III	Not a paired site	8140/3: Adenocarcinoma, NOS	IV	IVB	40	None/Unknown	Yes	No radiation and/or cancer-directed surgery	32	19	0	19	Dead	85	White	Married (including common law)	10	T4a	N0	M1b	Alive or dead due to cancer	Dead (attributable to this cancer dx)	Yes	One primary only	Insured	Male
2012	189	Unknown	Not a paired site	8140/3: Adenocarcinoma, NOS	IV	IVB	0	None/Unknown	Yes	No radiation and/or cancer-directed surgery	999	0	98	8	Dead	31	Asian or Pacific Islander	Married (including common law)	20	TX	NX	M1b	Alive or dead due to cancer	Dead (attributable to this cancer dx)	Yes	One primary only	Insured	Female
2011	199	Moderately differentiated; Grade II	Not a paired site	8210/3: Adenocarcinoma in adenomatous polyp	IV	IVB	30	None/Unknown	No/Unknown	No radiation and/or cancer-directed surgery	50	17	9	32	Dead	72	White	Married (including common law)	20	T4a	N2b	M1b	Alive or dead due to cancer	Dead (attributable to this cancer dx)	Yes	One primary only	Insured/No specifics	Male
2011	183	Well differentiated; Grade I	Not a paired site	8010/3: Carcinoma, NOS	IIIB	IIIB	40	None/Unknown	No/Unknown	No radiation and/or cancer-directed surgery	42	24	1	35	Dead	86	White	Widowed	20	T4a	N1a	M0	Alive or dead due to cancer	Dead (attributable to this cancer dx)	Yes	One primary only	Any Medicaid	Female
2012	182	Moderately differentiated; Grade II	Not a paired site	8263/3: Adenocarcinoma in tubulovillous adenoma	IIIC	IIIB	40	None/Unknown	Yes	No radiation and/or cancer-directed surgery	80	33	7	47	Alive	43	White	Married (including common law)	10	T2	N2b	M0	Alive or dead due to cancer	Alive or dead of other cause	Yes	One primary only	Insured	Female
2012	182	Unknown	Not a paired site	8140/3: Adenocarcinoma, NOS	IV	IVA	90	Beam radiation	Yes	Radiation after surgery	42	0	98	46	Alive	60	White	Married (including common law)	20	T3	N1NOS	M1a	Alive or dead due to cancer	Alive or dead of other cause	Yes	One primary only	Insured/No specifics	Female
2012	182	Moderately differentiated; Grade II	Not a paired site	8140/3: Adenocarcinoma, NOS	IIA	IIA	30	None/Unknown	No/Unknown	No radiation and/or cancer-directed surgery	55	30	0	25	Dead	91	White	Widowed	20	T3	N0	M0	N/A not first tumor	N/A not first tumor	Yes	2nd of 2 or more primaries	Insured	Female
2011	184	Moderately differentiated; Grade II	Not a paired site	8140/3: Adenocarcinoma, NOS	IV	IVB	41	None/Unknown	No/Unknown	No radiation and/or cancer-directed surgery	35	6	5	9	Dead	81	White	Married (including common law)	20	T4a	N2a	M1b	N/A not first tumor	N/A not first tumor	Yes	2nd of 2 or more primaries	Insured	Female
2010	189	Moderately differentiated; Grade II	Not a paired site	8140/3: Adenocarcinoma, NOS	IV	IVA	40	None/Unknown	Yes	No radiation and/or cancer-directed surgery	999	44	1	38	Dead	84	White	Single (never married)	20	T1	N1a	M1a	N/A not first tumor	N/A not first tumor	Yes	2nd of 2 or more primaries	Insured	Male
2010	187	Poorly differentiated; Grade III	Not a paired site	8140/3: Adenocarcinoma, NOS	IIIA	IIIA	40	None/Unknown	No/Unknown	No radiation and/or cancer-directed surgery	44	20	1	28	Dead	92	White	Widowed	10	T2	N1a	M0	N/A not first tumor	N/A not first tumor	No	2nd of 2 or more primaries	Insured	Female
2010	180	Moderately differentiated; Grade II	Not a paired site	8140/3: Adenocarcinoma, NOS	IIA	IIA	40	None/Unknown	No/Unknown	No radiation and/or cancer-directed surgery	41	13	0	67	Alive	84	White	Widowed	10	T3	N0	M0	N/A not first tumor	N/A not first tumor	Yes	4th of 4 or more primaries	Insured	Female
2012	187	Moderately differentiated; Grade II	Not a paired site	8140/3: Adenocarcinoma, NOS	IIIB	IIIB	30	None/Unknown	Yes	No radiation and/or cancer-directed surgery	30	12	1	43	Alive	80	White	Widowed	20	T4a	N1NOS	M0	N/A not first tumor	N/A not first tumor	Yes	2nd of 2 or more primaries	Insured	Female
2011	182	Moderately differentiated; Grade II	Not a paired site	8140/3: Adenocarcinoma, NOS	IIA	IIA	40	None/Unknown	No/Unknown	No radiation and/or cancer-directed surgery	33	55	0	51	Alive	77	White	Married (including common law)	20	T3	N0	M0	Alive or dead due to cancer	Alive or dead of other cause	Yes	One primary only	Insured	Male
2012	182	Moderately differentiated; Grade II	Not a paired site	8480/3: Mucinous adenocarcinoma	IIIC	IIIB	40	None/Unknown	No/Unknown	No radiation and/or cancer-directed surgery	45	23	4	44	Alive	79	White	Unknown	10	T2	N2a	M0	N/A not first tumor	N/A not first tumor	Yes	3rd of 3 or more primaries	Insurance status unknown	Male
2012	182	Moderately differentiated; Grade II	Not a paired site	8140/3: Adenocarcinoma, NOS	IV	IVA	30	None/Unknown	Yes	No radiation and/or cancer-directed surgery	999	0	98	47	Alive	80	White	Married (including common law)	20	TX	N0	M1a	N/A not first tumor	N/A not first tumor	No	3rd of 3 or more primaries	Insured	Male
2012	209	Moderately differentiated; Grade II	Not a paired site	8140/3: Adenocarcinoma, NOS	IV	IVA	0	None/Unknown	Yes	No radiation and/or cancer-directed surgery	999	0	98	46	Alive	80	White	Married (including common law)	20	T1	N0	M1a	N/A not first tumor	N/A not first tumor	No	5th of 5 or more primaries	Insured	Male
2011	182	Moderately differentiated; Grade II	Not a paired site	8140/3: Adenocarcinoma, NOS	IIIB	IIIB	40	None/Unknown	Yes	No radiation and/or cancer-directed surgery	41	22	1	48	Alive	74	White	Married (including common law)	10	T4a	N1a	M0	N/A not first tumor	N/A not first tumor	Yes	3rd of 3 or more primaries	Insurance status unknown	Female
2010	187	Moderately differentiated; Grade II	Not a paired site	8140/3: Adenocarcinoma, NOS	IIIB	IIIB	30	None/Unknown	No/Unknown	No radiation and/or cancer-directed surgery	50	38	2	63	Alive	76	White	Widowed	20	T3	N1b	M0	N/A not first tumor	N/A not first tumor	No	2nd of 2 or more primaries	Insured/No specifics	Female
2012	184	Unknown	Not a paired site	8140/3: Adenocarcinoma, NOS	IIA	IIA	50	None/Unknown	No/Unknown	No radiation and/or cancer-directed surgery	56	42	0	39	Alive	78	White	Unknown	20	T3	N0	M0	N/A not first tumor	N/A not first tumor	No	3rd of 3 or more primaries	Insurance status unknown	Female
2012	186	Undifferentiated; anaplastic; Grade IV	Not a paired site	8140/3: Adenocarcinoma, NOS	IIIB	IIIB	50	None/Unknown	No/Unknown	No radiation and/or cancer-directed surgery	47	42	1	39	Alive	78	White	Widowed	20	T3	N1a	M0	N/A not first tumor	N/A not first tumor	No	4th of 4 or more primaries	Insured	Female
2011	180	Moderately differentiated; Grade II	Not a paired site	8140/3: Adenocarcinoma, NOS	IV	IVA	40	None/Unknown	No/Unknown	No radiation and/or cancer-directed surgery	30	17	1	25	Dead	88	White	Married (including common law)	20	T3	N1a	M1a	N/A not first tumor	N/A not first tumor	Yes	3rd of 3 or more primaries	Insured	Male
2012	184	Well differentiated; Grade I	Left - origin of primary	8140/3: Adenocarcinoma, NOS	IIA	IIA	30	None/Unknown	No/Unknown	No radiation and/or cancer-directed surgery	25	20	0	42	Alive	88	White	Widowed	20	T3	N0	M0	N/A not first tumor	N/A not first tumor	Yes	2nd of 2 or more primaries	Insured	Male
2012	199	Well differentiated; Grade I	Not a paired site	8210/3: Adenocarcinoma in adenomatous polyp	IV	IVA	0	None/Unknown	Yes	No radiation and/or cancer-directed surgery	70	0	98	22	Dead	73	White	Single (never married)	20	T3	N1a	M1a	N/A not first tumor	N/A not first tumor	Yes	2nd of 2 or more primaries	Insured	Male
2011	209	Well differentiated; Grade I	Not a paired site	8140/3: Adenocarcinoma, NOS	IIA	IIA	30	None/Unknown	No/Unknown	No radiation and/or cancer-directed surgery	50	33	0	18	Dead	84	White	Married (including common law)	20	T3	N0	M0	N/A not first tumor	N/A not first tumor	Yes	2nd of 2 or more primaries	Insured	Male
2012	209	Moderately differentiated; Grade II	Not a paired site	8210/3: Adenocarcinoma in adenomatous polyp	IV	IVA	30	None/Unknown	Yes	No radiation and/or cancer-directed surgery	50	25	6	31	Dead	52	White	Married (including common law)	20	T4a	N2a	M1a	N/A not first tumor	N/A not first tumor	Yes	2nd of 2 or more primaries	Insured	Female
2012	180	Moderately differentiated; Grade II	Not a paired site	8140/3: Adenocarcinoma, NOS	IIA	IIA	40	None/Unknown	No/Unknown	No radiation and/or cancer-directed surgery	60	33	0	38	Alive	56	White	Married (including common law)	20	T3	N0	M0	N/A not first tumor	N/A not first tumor	Yes	3rd of 3 or more primaries	Insured	Male
2010	184	Moderately differentiated; Grade II	Not a paired site	8140/3: Adenocarcinoma, NOS	IIA	IIA	30	None/Unknown	No/Unknown	No radiation and/or cancer-directed surgery	33	12	0	68	Alive	83	White	Married (including common law)	20	T3	N0	M0	N/A not first tumor	N/A not first tumor	Yes	2nd of 2 or more primaries	Insured	Male
2012	209	Moderately differentiated; Grade II	Not a paired site	8140/3: Adenocarcinoma, NOS	IIA	IIA	30	Beam radiation	Yes	Radiation prior to surgery	35	24	0	7	Dead	74	White	Married (including common law)	20	T3	N0	M0	N/A not first tumor	N/A not first tumor	Yes	7th of 7 or more primaries	Insured	Male
2012	209	Poorly differentiated; Grade III	Not a paired site	8140/3: Adenocarcinoma, NOS	IV	IVB	30	None/Unknown	Yes	No radiation and/or cancer-directed surgery	64	1	0	29	Dead	43	White	Married (including common law)	10	T3	N0	M1b	N/A not first tumor	N/A not first tumor	Yes	2nd of 2 or more primaries	Insured	Female
2010	180	Poorly differentiated; Grade III	Not a paired site	8140/3: Adenocarcinoma, NOS	IIA	IIA	40	None/Unknown	No/Unknown	No radiation and/or cancer-directed surgery	58	15	0	34	Dead	84	White	Married (including common law)	20	T3	N0	M0	N/A not first tumor	N/A not first tumor	Yes	3rd of 3 or more primaries	Insured	Female
2011	182	Well differentiated; Grade I	Not a paired site	8480/3: Mucinous adenocarcinoma	IIA	IIA	30	None/Unknown	No/Unknown	No radiation and/or cancer-directed surgery	145	19	0	54	Alive	71	White	Married (including common law)	20	T3	N0	M0	N/A not first tumor	N/A not first tumor	Yes	3rd of 3 or more primaries	Any Medicaid	Female
2010	189	Poorly differentiated; Grade III	Not a paired site	8255/3: Adenocarcinoma with mixed subtypes	IV	IVA	41	None/Unknown	Yes	No radiation and/or cancer-directed surgery	90	17	2	9	Dead	75	White	Married (including common law)	20	T4b	N1b	M1a	N/A not first tumor	N/A not first tumor	Yes	2nd of 2 or more primaries	Insured	Female
2010	209	Poorly differentiated; Grade III	Not a paired site	8480/3: Mucinous adenocarcinoma	IIIB	IIIB	60	Beam radiation	Yes	Radiation after surgery	40	24	2	50	Dead	85	White	Widowed	20	T3	N1b	M0	N/A not first tumor	N/A not first tumor	Yes	2nd of 2 or more primaries	Insured	Male
2010	182	Moderately differentiated; Grade II	Not a paired site	8140/3: Adenocarcinoma, NOS	IIA	IIA	30	None/Unknown	No/Unknown	No radiation and/or cancer-directed surgery	30	14	0	60	Alive	79	White	Married (including common law)	20	T3	N0	M0	N/A not first tumor	N/A not first tumor	Yes	2nd of 2 or more primaries	Insured	Female
2010	187	Moderately differentiated; Grade II	Not a paired site	8140/3: Adenocarcinoma, NOS	IIA	IIA	30	None/Unknown	No/Unknown	No radiation and/or cancer-directed surgery	21	22	0	68	Alive	87	White	Married (including common law)	20	T3	N0	M0	N/A not first tumor	N/A not first tumor	Yes	2nd of 2 or more primaries	Insured	Female
2012	209	Poorly differentiated; Grade III	Not a paired site	8140/3: Adenocarcinoma, NOS	IIIB	IIIB	30	None/Unknown	Yes	No radiation and/or cancer-directed surgery	999	18	3	40	Alive	46	White	Married (including common law)	20	T3	N1NOS	M0	N/A not first tumor	N/A not first tumor	Yes	2nd of 2 or more primaries	Insurance status unknown	Male
2011	209	Moderately differentiated; Grade II	Not a paired site	8140/3: Adenocarcinoma, NOS	IIIA	IIIA	30	Beam radiation	Yes	Radiation prior to surgery	24	9	2	48	Alive	57	White	Married (including common law)	20	T2	N1b	M0	N/A not first tumor	N/A not first tumor	Yes	2nd of 2 or more primaries	Insured	Male
2011	186	Poorly differentiated; Grade III	Not a paired site	8480/3: Mucinous adenocarcinoma	IV	IVA	40	None/Unknown	Yes	No radiation and/or cancer-directed surgery	999	24	21	19	Dead	66	White	Married (including common law)	10	T4a	N2b	M1a	N/A not first tumor	N/A not first tumor	No	3rd of 3 or more primaries	Insurance status unknown	Female
2011	180	Poorly differentiated; Grade III	Not a paired site	8560/3: Adenosquamous carcinoma	IV	IVB	40	None/Unknown	Yes	No radiation and/or cancer-directed surgery	35	18	5	8	Dead	78	White	Married (including common law)	20	T4a	N2a	M1b	N/A not first tumor	N/A not first tumor	Yes	2nd of 2 or more primaries	Insured	Male
2012	189	Well differentiated; Grade I	Not a paired site	8140/3: Adenocarcinoma, NOS	IIIC	IIIC	40	None/Unknown	Yes	No radiation and/or cancer-directed surgery	999	35	9	43	Alive	77	White	Married (including common law)	20	T4a	N2b	M0	N/A not first tumor	N/A not first tumor	Yes	2nd of 2 or more primaries	Any Medicaid	Male
2011	187	Moderately differentiated; Grade II	Not a paired site	8140/3: Adenocarcinoma, NOS	IIIB	IIIB	30	None/Unknown	Yes	No radiation and/or cancer-directed surgery	35	12	1	39	Dead	86	White	Widowed	10	T3	N1a	M0	N/A not first tumor	N/A not first tumor	Yes	2nd of 2 or more primaries	Insured	Female
2011	180	Moderately differentiated; Grade II	Not a paired site	8140/3: Adenocarcinoma, NOS	IV	IVA	40	None/Unknown	Yes	No radiation and/or cancer-directed surgery	40	11	1	20	Dead	90	Black	Widowed	20	T4a	N1a	M1a	N/A not first tumor	N/A not first tumor	Yes	2nd of 2 or more primaries	Insured	Male
2011	209	Unknown	Not a paired site	8140/3: Adenocarcinoma, NOS	IIIC	IIIB	30	None/Unknown	Yes	No radiation and/or cancer-directed surgery	19	16	5	59	Alive	64	White	Married (including common law)	20	T3	N2a	M0	N/A not first tumor	N/A not first tumor	Yes	3rd of 3 or more primaries	Insured	Male
2010	187	Poorly differentiated; Grade III	Not a paired site	8140/3: Adenocarcinoma, NOS	IV	IVA	30	None/Unknown	Yes	No radiation and/or cancer-directed surgery	40	9	5	35	Dead	79	White	Married (including common law)	20	T3	N2a	M1a	N/A not first tumor	N/A not first tumor	Yes	2nd of 2 or more primaries	Insured	Male
2010	187	Moderately differentiated; Grade II	Not a paired site	8140/3: Adenocarcinoma, NOS	IV	IVA	30	None/Unknown	Yes	No radiation and/or cancer-directed surgery	42	24	4	32	Dead	78	White	Married (including common law)	10	T3	N2a	M1a	N/A not first tumor	N/A not first tumor	Yes	2nd of 2 or more primaries	Insured	Male
2011	180	Moderately differentiated; Grade II	Not a paired site	8140/3: Adenocarcinoma, NOS	IV	IVA	40	None/Unknown	Yes	No radiation and/or cancer-directed surgery	55	23	4	17	Dead	88	White	Widowed	10	T3	N2a	M1a	N/A not first tumor	N/A not first tumor	Yes	2nd of 2 or more primaries	Insured/No specifics	Female
2011	184	Moderately differentiated; Grade II	Not a paired site	8480/3: Mucinous adenocarcinoma	IV	IVNOS	40	None/Unknown	Yes	No radiation and/or cancer-directed surgery	60	25	10	25	Dead	83	White	Married (including common law)	20	T3	N2b	M1NOS	N/A not first tumor	N/A not first tumor	Yes	2nd of 2 or more primaries	Insured/No specifics	Female
2012	180	Moderately differentiated; Grade II	Not a paired site	8140/3: Adenocarcinoma, NOS	IV	IVB	0	None/Unknown	Yes	No radiation and/or cancer-directed surgery	999	0	98	27	Dead	74	Black	Married (including common law)	10	TX	NX	M1b	N/A not first tumor	N/A not first tumor	Yes	2nd of 2 or more primaries	Insured	Male
2012	189	Unknown	Not a paired site	8140/3: Adenocarcinoma, NOS	IV	IVA	0	None/Unknown	No/Unknown	No radiation and/or cancer-directed surgery	999	0	98	5	Dead	74	White	Married (including common law)	20	TX	NX	M1a	N/A not first tumor	N/A not first tumor	Yes	2nd of 2 or more primaries	Insured	Male
2011	209	Well differentiated; Grade I	Not a paired site	8263/3: Adenocarcinoma in tubulovillous adenoma	0	0	26	None/Unknown	No/Unknown	No radiation and/or cancer-directed surgery	999	0	98	48	Dead	78	White	Married (including common law)	10	Tis	N0	M0	N/A not first tumor	N/A not first tumor	Yes	3rd of 3 or more primaries	Insured	Male
2010	184	Moderately differentiated; Grade II	Not a paired site	8480/3: Mucinous adenocarcinoma	IIIA	IIIA	30	None/Unknown	No/Unknown	No radiation and/or cancer-directed surgery	40	14	1	71	Alive	84	White	Married (including common law)	20	T2	N1a	M0	N/A not first tumor	N/A not first tumor	No	3rd of 3 or more primaries	Insured	Female
2010	199	Moderately differentiated; Grade II	Not a paired site	8140/3: Adenocarcinoma, NOS	I	I	30	None/Unknown	No/Unknown	No radiation and/or cancer-directed surgery	25	15	0	66	Alive	82	White	Single (never married)	20	T2	N0	M0	N/A not first tumor	N/A not first tumor	Yes	2nd of 2 or more primaries	Insured	Female
2010	182	Moderately differentiated; Grade II	Not a paired site	8140/3: Adenocarcinoma, NOS	UNK Stage	UNK Stage	0	None/Unknown	Yes	No radiation and/or cancer-directed surgery	70	0	98	12	Dead	92	White	Unknown	20	T1	NX	M0	N/A not first tumor	N/A not first tumor	Yes	3rd of 3 or more primaries	Insured/No specifics	Male
2011	182	Poorly differentiated; Grade III	Not a paired site	8140/3: Adenocarcinoma, NOS	IIIC	IIIC	40	None/Unknown	Yes	No radiation and/or cancer-directed surgery	45	21	8	53	Alive	70	White	Married (including common law)	20	T3	N2b	M0	N/A not first tumor	N/A not first tumor	Yes	2nd of 2 or more primaries	Insured	Female
2011	182	Poorly differentiated; Grade III	Not a paired site	8255/3: Adenocarcinoma with mixed subtypes	IV	IVB	40	None/Unknown	Yes	No radiation and/or cancer-directed surgery	50	18	17	15	Dead	72	White	Married (including common law)	10	T4b	N2b	M1b	N/A not first tumor	N/A not first tumor	Yes	2nd of 2 or more primaries	Insured/No specifics	Female
2011	209	Moderately differentiated; Grade II	Not a paired site	8140/3: Adenocarcinoma, NOS	IIIC	IIIC	30	None/Unknown	No/Unknown	No radiation and/or cancer-directed surgery	55	16	12	51	Alive	85	White	Married (including common law)	20	T3	N2b	M0	N/A not first tumor	N/A not first tumor	Yes	2nd of 2 or more primaries	Insured/No specifics	Male
2010	184	Moderately differentiated; Grade II	Not a paired site	8140/3: Adenocarcinoma, NOS	IIB	IIC	30	None/Unknown	No/Unknown	No radiation and/or cancer-directed surgery	30	16	0	41	Dead	67	White	Married (including common law)	20	T4b	N0	M0	N/A not first tumor	N/A not first tumor	Yes	2nd of 2 or more primaries	Insured	Male
2011	199	Poorly differentiated; Grade III	Not a paired site	8140/3: Adenocarcinoma, NOS	IV	IVB	30	None/Unknown	Yes	No radiation and/or cancer-directed surgery	20	24	0	49	Dead	45	Black	Single (never married)	20	T3	N1c	M1b	N/A not first tumor	N/A not first tumor	Yes	2nd of 2 or more primaries	Insured	Female
2012	184	Moderately differentiated; Grade II	Not a paired site	8140/3: Adenocarcinoma, NOS	IV	IVA	40	None/Unknown	Yes	No radiation and/or cancer-directed surgery	40	39	3	42	Alive	69	White	Single (never married)	20	T4a	N1NOS	M1a	N/A not first tumor	N/A not first tumor	Yes	2nd of 2 or more primaries	Any Medicaid	Male
2010	180	Well differentiated; Grade I	Not a paired site	8210/3: Adenocarcinoma in adenomatous polyp	I	I	40	None/Unknown	No/Unknown	No radiation and/or cancer-directed surgery	7	23	0	69	Alive	51	White	Married (including common law)	20	T1	N0	M0	Alive or dead due to cancer	Alive or dead of other cause	Yes	One primary only	Insured	Female
2010	186	Well differentiated; Grade I	Not a paired site	8140/3: Adenocarcinoma, NOS	IV	IVB	0	None/Unknown	Yes	No radiation and/or cancer-directed surgery	999	0	98	60	Alive	61	Black	Divorced	10	TX	N0	M1b	N/A not first tumor	N/A not first tumor	Yes	2nd of 2 or more primaries	Any Medicaid	Female
2012	187	Poorly differentiated; Grade III	Not a paired site	8490/3: Signet ring cell carcinoma	IV	IVA	30	None/Unknown	Yes	No radiation and/or cancer-directed surgery	20	14	0	20	Dead	62	White	Married (including common law)	20	T4a	N0	M1a	N/A not first tumor	N/A not first tumor	Yes	2nd of 2 or more primaries	Insured	Male
2011	185	Moderately differentiated; Grade II	Not a paired site	8140/3: Adenocarcinoma, NOS	IIA	IIA	40	None/Unknown	No/Unknown	No radiation and/or cancer-directed surgery	55	20	0	48	Alive	87	White	Married (including common law)	20	T3	N0	M0	N/A not first tumor	N/A not first tumor	Yes	2nd of 2 or more primaries	Insured	Male
2012	209	Poorly differentiated; Grade III	Not a paired site	8574/3: Adenocarcinoma with neuroendocrine differentiation	IIIC	IIIB	50	None/Unknown	Yes	No radiation and/or cancer-directed surgery	32	14	5	37	Alive	77	White	Married (including common law)	10	T2	N2a	M0	N/A not first tumor	N/A not first tumor	Yes	2nd of 2 or more primaries	Insured	Male
2010	186	Poorly differentiated; Grade III	Not a paired site	8140/3: Adenocarcinoma, NOS	IIIA	IIIA	30	None/Unknown	Yes	No radiation and/or cancer-directed surgery	45	15	2	64	Alive	70	White	Married (including common law)	20	T2	N1b	M0	N/A not first tumor	N/A not first tumor	Yes	2nd of 2 or more primaries	Insured	Male
2010	209	Moderately differentiated; Grade II	Not a paired site	8140/3: Adenocarcinoma, NOS	IV	IVA	0	Beam radiation	Yes	No radiation and/or cancer-directed surgery	999	0	98	13	Dead	64	White	Divorced	20	T3	N0	M1a	N/A not first tumor	N/A not first tumor	Yes	2nd of 2 or more primaries	Insured	Male
2011	209	Moderately differentiated; Grade II	Not a paired site	8140/3: Adenocarcinoma, NOS	IIA	IIA	30	Beam radiation	Yes	Radiation prior to surgery	999	1	0	58	Alive	65	White	Married (including common law)	10	T3	N0	M0	N/A not first tumor	N/A not first tumor	Yes	2nd of 2 or more primaries	Insured	Male
2011	187	Moderately differentiated; Grade II	Not a paired site	8140/3: Adenocarcinoma, NOS	IV	IVB	40	None/Unknown	Yes	No radiation and/or cancer-directed surgery	32	18	1	50	Alive	82	White	Single (never married)	10	T4a	N1a	M1b	N/A not first tumor	N/A not first tumor	No	2nd of 2 or more primaries	Insured/No specifics	Male
2011	187	Moderately differentiated; Grade II	Not a paired site	8140/3: Adenocarcinoma, NOS	I	I	30	None/Unknown	Yes	No radiation and/or cancer-directed surgery	55	19	0	58	Alive	69	White	Divorced	20	T2	N0	M0	N/A not first tumor	N/A not first tumor	Yes	2nd of 2 or more primaries	Insured/No specifics	Male
2012	182	Poorly differentiated; Grade III	Not a paired site	8140/3: Adenocarcinoma, NOS	IIA	IIA	40	None/Unknown	No/Unknown	No radiation and/or cancer-directed surgery	65	15	0	40	Alive	86	White	Divorced	20	T3	N0	M0	N/A not first tumor	N/A not first tumor	Yes	2nd of 2 or more primaries	Insured	Female
2010	182	Moderately differentiated; Grade II	Not a paired site	8140/3: Adenocarcinoma, NOS	IIA	IIA	40	None/Unknown	No/Unknown	No radiation and/or cancer-directed surgery	55	21	0	70	Alive	64	White	Divorced	20	T3	N0	M0	Alive or dead due to cancer	Alive or dead of other cause	Yes	One primary only	Insured	Male
2010	186	Well differentiated; Grade I	Not a paired site	8140/3: Adenocarcinoma, NOS	IV	IVB	40	None/Unknown	Yes	No radiation and/or cancer-directed surgery	70	0	98	13	Dead	62	White	Married (including common law)	20	T4a	N0	M1b	Alive or dead due to cancer	Dead (attributable to this cancer dx)	Yes	One primary only	Insured/No specifics	Female
2010	199	Moderately differentiated; Grade II	Not a paired site	8140/3: Adenocarcinoma, NOS	IIA	IIA	30	None/Unknown	No/Unknown	No radiation and/or cancer-directed surgery	60	15	0	65	Alive	62	White	Married (including common law)	20	T3	N0	M0	Alive or dead due to cancer	Alive or dead of other cause	Yes	One primary only	Insured	Female
2010	189	Unknown	Not a paired site	8140/3: Adenocarcinoma, NOS	IV	IVA	0	None/Unknown	Yes	No radiation and/or cancer-directed surgery	999	0	98	11	Dead	65	White	Single (never married)	20	TX	N0	M1a	Alive or dead due to cancer	Dead (attributable to this cancer dx)	Yes	One primary only	Any Medicaid	Male
2010	183	Moderately differentiated; Grade II	Not a paired site	8140/3: Adenocarcinoma, NOS	IV	IVA	0	None/Unknown	Yes	No radiation and/or cancer-directed surgery	999	0	98	5	Dead	56	White	Single (never married)	10	T1	N0	M1a	Alive or dead due to cancer	Dead (attributable to this cancer dx)	Yes	One primary only	Insurance status unknown	Male
2010	209	Well differentiated; Grade I	Not a paired site	8140/3: Adenocarcinoma, NOS	IIA	IIA	50	Beam radiation	Yes	Radiation prior to surgery	50	19	0	27	Dead	67	White	Married (including common law)	20	T3	N0	M0	Alive or dead due to cancer	Dead (attributable to this cancer dx)	Yes	One primary only	Insured	Female
2010	182	Moderately differentiated; Grade II	Not a paired site	8140/3: Adenocarcinoma, NOS	IIA	IIA	30	None/Unknown	No/Unknown	No radiation and/or cancer-directed surgery	60	6	0	11	Dead	92	White	Widowed	20	T3	N0	M0	Alive or dead due to cancer	Dead (attributable to this cancer dx)	Yes	One primary only	Insured	Female
2010	183	Moderately differentiated; Grade II	Not a paired site	8140/3: Adenocarcinoma, NOS	IV	IVB	0	None/Unknown	Yes	No radiation and/or cancer-directed surgery	999	0	98	18	Dead	84	White	Widowed	10	TX	N1NOS	M1b	Alive or dead due to cancer	Dead (attributable to this cancer dx)	Yes	One primary only	Insured	Female
2010	180	Moderately differentiated; Grade II	Not a paired site	8140/3: Adenocarcinoma, NOS	IIA	IIA	30	None/Unknown	No/Unknown	No radiation and/or cancer-directed surgery	32	21	0	69	Alive	88	White	Widowed	10	T3	N0	M0	Alive or dead due to cancer	Alive or dead of other cause	Yes	One primary only	Insured	Female
2010	180	Moderately differentiated; Grade II	Not a paired site	8480/3: Mucinous adenocarcinoma	IV	IVA	40	None/Unknown	Yes	No radiation and/or cancer-directed surgery	110	20	1	4	Dead	92	White	Single (never married)	10	T3	N1a	M1a	Alive or dead due to cancer	Dead (attributable to this cancer dx)	Yes	One primary only	Insured	Female
2010	182	Moderately differentiated; Grade II	Not a paired site	8140/3: Adenocarcinoma, NOS	I	I	40	None/Unknown	No/Unknown	No radiation and/or cancer-directed surgery	25	26	0	69	Alive	80	White	Single (never married)	20	T2	N0	M0	Alive or dead due to cancer	Alive or dead of other cause	Yes	One primary only	Insured	Male
2010	186	Moderately differentiated; Grade II	Not a paired site	8140/3: Adenocarcinoma, NOS	IV	IVA	0	None/Unknown	Yes	No radiation and/or cancer-directed surgery	80	0	98	9	Dead	53	White	Married (including common law)	20	T3	N2NOS	M1a	Alive or dead due to cancer	Dead (attributable to this cancer dx)	Yes	1st of 2 or more primaries	Insured	Male
2010	186	Moderately differentiated; Grade II	Not a paired site	8140/3: Adenocarcinoma, NOS	IV	IVA	0	None/Unknown	Yes	No radiation and/or cancer-directed surgery	999	0	98	25	Dead	72	White	Unknown	10	TX	N0	M1a	Alive or dead due to cancer	Dead (attributable to this cancer dx)	Yes	One primary only	Insurance status unknown	Female
2010	180	Poorly differentiated; Grade III	Not a paired site	8140/3: Adenocarcinoma, NOS	IV	IVA	40	None/Unknown	Yes	No radiation and/or cancer-directed surgery	32	17	2	30	Dead	44	White	Married (including common law)	10	T4a	N1NOS	M1a	Alive or dead due to cancer	Dead (attributable to this cancer dx)	Yes	One primary only	Insured/No specifics	Female
2010	183	Moderately differentiated; Grade II	Not a paired site	8263/3: Adenocarcinoma in tubulovillous adenoma	IIIB	IIIB	40	None/Unknown	No/Unknown	No radiation and/or cancer-directed surgery	100	22	0	38	Dead	74	White	Widowed	10	T4a	N1c	M0	Alive or dead due to cancer	Dead (attributable to this cancer dx)	Yes	One primary only	Insured	Female
2010	199	Unknown	Not a paired site	8140/3: Adenocarcinoma, NOS	IV	IVB	0	None/Unknown	Yes	No radiation and/or cancer-directed surgery	40	0	98	6	Dead	81	White	Widowed	20	TX	N1NOS	M1b	Alive or dead due to cancer	Dead (attributable to this cancer dx)	Yes	One primary only	Insured	Female
2010	187	Undifferentiated; anaplastic; Grade IV	Not a paired site	8480/3: Mucinous adenocarcinoma	IV	IVB	41	None/Unknown	Yes	No radiation and/or cancer-directed surgery	95	25	6	66	Alive	72	White	Married (including common law)	20	T4b	N2a	M1b	Alive or dead due to cancer	Alive or dead of other cause	Yes	One primary only	Insured	Male
2010	189	Unknown	Not a paired site	8140/3: Adenocarcinoma, NOS	IV	IVB	0	None/Unknown	Yes	No radiation and/or cancer-directed surgery	999	0	98	8	Dead	57	White	Married (including common law)	20	TX	NX	M1b	Alive or dead due to cancer	Dead (attributable to this cancer dx)	Yes	One primary only	Insured/No specifics	Female
2010	182	Poorly differentiated; Grade III	Not a paired site	8140/3: Adenocarcinoma, NOS	IV	IVB	40	None/Unknown	Yes	No radiation and/or cancer-directed surgery	78	7	0	4	Dead	73	White	Married (including common law)	10	T4a	N0	M1b	Dead (attributable to causes other than this cancer dx)	Alive or dead of other cause	Yes	1st of 2 or more primaries	Insured/No specifics	Female
2010	184	Moderately differentiated; Grade II	Not a paired site	8140/3: Adenocarcinoma, NOS	IIA	IIA	30	None/Unknown	No/Unknown	No radiation and/or cancer-directed surgery	57	25	0	66	Alive	58	White	Divorced	10	T3	N0	M0	Alive or dead due to cancer	Alive or dead of other cause	Yes	One primary only	Any Medicaid	Female
2010	182	Moderately differentiated; Grade II	Not a paired site	8140/3: Adenocarcinoma, NOS	IV	IVB	40	None/Unknown	Yes	No radiation and/or cancer-directed surgery	80	25	18	17	Dead	72	White	Widowed	10	T3	N2b	M1b	Alive or dead due to cancer	Dead (attributable to this cancer dx)	Yes	One primary only	Insured/No specifics	Female
2010	187	Moderately differentiated; Grade II	Not a paired site	8140/3: Adenocarcinoma, NOS	IV	IVA	40	None/Unknown	Yes	No radiation and/or cancer-directed surgery	40	19	6	48	Dead	42	White	Married (including common law)	10	T3	N2a	M1a	Alive or dead due to cancer	Dead (attributable to this cancer dx)	Yes	One primary only	Insured	Male
2010	187	Moderately differentiated; Grade II	Not a paired site	8140/3: Adenocarcinoma, NOS	IV	IVA	0	None/Unknown	Yes	No radiation and/or cancer-directed surgery	40	0	98	24	Dead	67	Black	Widowed	10	T1	N0	M1a	Alive or dead due to cancer	Dead (attributable to this cancer dx)	Yes	One primary only	Uninsured	Male
2010	186	Moderately differentiated; Grade II	Not a paired site	8140/3: Adenocarcinoma, NOS	IIA	IIA	30	None/Unknown	No/Unknown	No radiation and/or cancer-directed surgery	78	7	0	4	Alive	70	White	Married (including common law)	20	T3	N0	M0	Alive or dead due to cancer	Alive or dead of other cause	Yes	One primary only	Insured	Female
2010	184	Moderately differentiated; Grade II	Not a paired site	8480/3: Mucinous adenocarcinoma	IIA	IIA	40	None/Unknown	No/Unknown	No radiation and/or cancer-directed surgery	98	16	0	63	Alive	89	White	Married (including common law)	20	T3	N0	M0	Alive or dead due to cancer	Alive or dead of other cause	Yes	One primary only	Insured	Male
2010	187	Moderately differentiated; Grade II	Not a paired site	8140/3: Adenocarcinoma, NOS	IV	IVA	0	None/Unknown	No/Unknown	No radiation and/or cancer-directed surgery	999	0	98	9	Dead	72	White	Single (never married)	20	TX	N0	M1a	Alive or dead due to cancer	Dead (attributable to this cancer dx)	Yes	One primary only	Insured	Female
2010	187	Poorly differentiated; Grade III	Not a paired site	8140/3: Adenocarcinoma, NOS	IV	IVA	30	None/Unknown	Yes	No radiation and/or cancer-directed surgery	18	12	3	37	Dead	79	White	Married (including common law)	20	T3	N1b	M1a	Alive or dead due to cancer	Dead (attributable to this cancer dx)	Yes	One primary only	Insured	Male
2010	182	Moderately differentiated; Grade II	Not a paired site	8140/3: Adenocarcinoma, NOS	IIA	IIA	40	None/Unknown	No/Unknown	No radiation and/or cancer-directed surgery	25	35	0	42	Dead	75	White	Widowed	20	T3	N0	M0	Dead (attributable to causes other than this cancer dx)	Alive or dead of other cause	Yes	1st of 2 or more primaries	Insured/No specifics	Female
2010	187	Poorly differentiated; Grade III	Not a paired site	8140/3: Adenocarcinoma, NOS	IIIB	IIIC	40	None/Unknown	No/Unknown	No radiation and/or cancer-directed surgery	65	28	1	64	Alive	83	White	Widowed	20	T4b	N1a	M0	Alive or dead due to cancer	Alive or dead of other cause	Yes	One primary only	Any Medicaid	Female
2010	182	Moderately differentiated; Grade II	Not a paired site	8263/3: Adenocarcinoma in tubulovillous adenoma	IIIC	IIIC	30	None/Unknown	No/Unknown	No radiation and/or cancer-directed surgery	35	16	7	7	Dead	74	White	Married (including common law)	20	T3	N2b	M0	Dead (attributable to causes other than this cancer dx)	Alive or dead of other cause	Yes	One primary only	Insured	Female
2010	187	Moderately differentiated; Grade II	Not a paired site	8140/3: Adenocarcinoma, NOS	IIA	IIA	30	None/Unknown	Yes	No radiation and/or cancer-directed surgery	85	20	0	64	Alive	62	White	Married (including common law)	20	T3	N0	M0	Alive or dead due to cancer	Alive or dead of other cause	Yes	One primary only	Insured	Male
2010	187	Moderately differentiated; Grade II	Not a paired site	8140/3: Adenocarcinoma, NOS	IIB	IIC	30	None/Unknown	Yes	No radiation and/or cancer-directed surgery	105	20	0	63	Alive	68	White	Married (including common law)	10	T4b	N0	M0	Alive or dead due to cancer	Alive or dead of other cause	Yes	1st of 2 or more primaries	Insured/No specifics	Female
2010	180	Moderately differentiated; Grade II	Not a paired site	8140/3: Adenocarcinoma, NOS	IIA	IIA	40	None/Unknown	No/Unknown	No radiation and/or cancer-directed surgery	22	29	0	69	Alive	82	White	Divorced	10	T3	N0	M0	Alive or dead due to cancer	Alive or dead of other cause	Yes	One primary only	Insured/No specifics	Female
2010	182	Moderately differentiated; Grade II	Not a paired site	8210/3: Adenocarcinoma in adenomatous polyp	I	I	30	None/Unknown	No/Unknown	No radiation and/or cancer-directed surgery	3	14	0	51	Dead	75	White	Divorced	20	T1	N0	M0	N/A not first tumor	N/A not first tumor	Yes	2nd of 2 or more primaries	Insured	Female
2010	187	Moderately differentiated; Grade II	Not a paired site	8140/3: Adenocarcinoma, NOS	IV	IVB	30	None/Unknown	Yes	No radiation and/or cancer-directed surgery	30	19	4	11	Dead	81	White	Married (including common law)	10	T3	N2a	M1b	Alive or dead due to cancer	Dead (attributable to this cancer dx)	Yes	One primary only	Any Medicaid	Female
2010	186	Moderately differentiated; Grade II	Not a paired site	8263/3: Adenocarcinoma in tubulovillous adenoma	I	I	50	None/Unknown	No/Unknown	No radiation and/or cancer-directed surgery	10	38	0	66	Alive	67	White	Married (including common law)	10	T1	N0	M0	Alive or dead due to cancer	Alive or dead of other cause	Yes	One primary only	Insured	Male
2010	182	Moderately differentiated; Grade II	Not a paired site	8140/3: Adenocarcinoma, NOS	I	I	30	None/Unknown	No/Unknown	No radiation and/or cancer-directed surgery	22	27	0	61	Alive	82	White	Widowed	20	T1	N0	M0	Alive or dead due to cancer	Alive or dead of other cause	Yes	One primary only	Insured	Female
2010	187	Poorly differentiated; Grade III	Not a paired site	8140/3: Adenocarcinoma, NOS	IIA	IIA	30	None/Unknown	No/Unknown	No radiation and/or cancer-directed surgery	52	26	0	65	Alive	50	White	Married (including common law)	20	T3	N0	M0	Alive or dead due to cancer	Alive or dead of other cause	Yes	One primary only	Insured	Male
2010	187	Well differentiated; Grade I	Not a paired site	8210/3: Adenocarcinoma in adenomatous polyp	I	I	40	None/Unknown	No/Unknown	No radiation and/or cancer-directed surgery	5	5	0	63	Alive	65	White	Widowed	20	T1	N0	M0	Alive or dead due to cancer	Alive or dead of other cause	Yes	1st of 2 or more primaries	Insured	Male
2010	182	Moderately differentiated; Grade II	Not a paired site	8140/3: Adenocarcinoma, NOS	IIIC	IIIB	30	None/Unknown	Yes	No radiation and/or cancer-directed surgery	50	38	6	67	Alive	49	White	Single (never married)	10	T3	N2a	M0	Alive or dead due to cancer	Alive or dead of other cause	Yes	One primary only	Insured	Male
2010	187	Poorly differentiated; Grade III	Not a paired site	8490/3: Signet ring cell carcinoma	IIB	IIC	70	None/Unknown	No/Unknown	No radiation and/or cancer-directed surgery	70	26	0	60	Alive	78	White	Widowed	20	T4b	N0	M0	Alive or dead due to cancer	Alive or dead of other cause	Yes	One primary only	Insured/No specifics	Female
2010	182	Well differentiated; Grade I	Not a paired site	8480/3: Mucinous adenocarcinoma	I	I	30	None/Unknown	No/Unknown	No radiation and/or cancer-directed surgery	53	15	0	70	Alive	75	White	Married (including common law)	10	T2	N0	M0	N/A not first tumor	N/A not first tumor	Yes	2nd of 2 or more primaries	Insured	Male
2010	183	Poorly differentiated; Grade III	Not a paired site	8480/3: Mucinous adenocarcinoma	IIA	IIA	40	None/Unknown	No/Unknown	No radiation and/or cancer-directed surgery	62	17	0	61	Alive	84	White	Widowed	10	T3	N0	M0	Alive or dead due to cancer	Alive or dead of other cause	Yes	One primary only	Insured/No specifics	Male
2010	187	Moderately differentiated; Grade II	Not a paired site	8480/3: Mucinous adenocarcinoma	IIA	IIA	40	None/Unknown	No/Unknown	No radiation and/or cancer-directed surgery	55	9	0	60	Dead	69	White	Married (including common law)	10	T3	N0	M0	Dead (attributable to causes other than this cancer dx)	Alive or dead of other cause	Yes	One primary only	Insured/No specifics	Male
2010	187	Moderately differentiated; Grade II	Not a paired site	8140/3: Adenocarcinoma, NOS	I	I	30	None/Unknown	No/Unknown	No radiation and/or cancer-directed surgery	26	19	0	63	Alive	80	White	Divorced	20	T2	N0	M0	Alive or dead due to cancer	Alive or dead of other cause	Yes	One primary only	Insured	Female
2010	185	Moderately differentiated; Grade II	Not a paired site	8480/3: Mucinous adenocarcinoma	I	I	40	None/Unknown	No/Unknown	No radiation and/or cancer-directed surgery	9	7	0	66	Alive	57	Black	Separated	10	T1	N0	M0	Alive or dead due to cancer	Alive or dead of other cause	Yes	One primary only	Any Medicaid	Male
2010	180	Well differentiated; Grade I	Not a paired site	8140/3: Adenocarcinoma, NOS	IV	IVB	40	None/Unknown	Yes	No radiation and/or cancer-directed surgery	70	27	5	35	Dead	49	White	Divorced	20	T3	N2a	M1b	Alive or dead due to cancer	Dead (attributable to this cancer dx)	Yes	One primary only	Any Medicaid	Male
2010	209	Moderately differentiated; Grade II	Not a paired site	8140/3: Adenocarcinoma, NOS	IV	IVA	0	None/Unknown	Yes	No radiation and/or cancer-directed surgery	999	0	98	33	Dead	62	White	Divorced	20	TX	NX	M1a	Alive or dead due to cancer	Dead (attributable to this cancer dx)	Yes	One primary only	Any Medicaid	Male
2010	187	Moderately differentiated; Grade II	Not a paired site	8140/3: Adenocarcinoma, NOS	IV	IVB	0	None/Unknown	Yes	No radiation and/or cancer-directed surgery	999	0	98	11	Dead	84	White	Widowed	10	TX	N0	M1b	Dead (attributable to causes other than this cancer dx)	Alive or dead of other cause	Yes	One primary only	Insured	Male
2010	182	Poorly differentiated; Grade III	Not a paired site	8140/3: Adenocarcinoma, NOS	IV	IVA	40	None/Unknown	Yes	No radiation and/or cancer-directed surgery	30	14	6	24	Dead	76	White	Married (including common law)	10	T4a	N2a	M1a	Alive or dead due to cancer	Dead (attributable to this cancer dx)	Yes	One primary only	Insured	Male
2010	187	Unknown	Not a paired site	8140/3: Adenocarcinoma, NOS	IV	IVB	0	None/Unknown	Yes	No radiation and/or cancer-directed surgery	999	0	98	6	Dead	59	White	Widowed	20	TX	N0	M1b	Alive or dead due to cancer	Dead (attributable to this cancer dx)	Yes	One primary only	Any Medicaid	Female
2010	199	Poorly differentiated; Grade III	Not a paired site	8140/3: Adenocarcinoma, NOS	IIIB	IIIB	30	Beam radiation	Yes	Radiation before and after surgery	65	20	1	64	Alive	27	White	Single (never married)	20	T3	N1a	M0	Alive or dead due to cancer	Alive or dead of other cause	Yes	One primary only	Any Medicaid	Male
2010	187	Poorly differentiated; Grade III	Not a paired site	8140/3: Adenocarcinoma, NOS	IV	IVA	0	None/Unknown	Yes	No radiation and/or cancer-directed surgery	999	0	98	24	Dead	49	White	Single (never married)	10	T1	N0	M1a	Alive or dead due to cancer	Dead (attributable to this cancer dx)	Yes	One primary only	Insured	Male
2010	186	Moderately differentiated; Grade II	Not a paired site	8140/3: Adenocarcinoma, NOS	IV	IVA	40	None/Unknown	Yes	No radiation and/or cancer-directed surgery	50	12	4	61	Alive	72	White	Married (including common law)	20	T3	N2a	M1a	N/A not first tumor	N/A not first tumor	Yes	2nd of 2 or more primaries	Insured	Male
2010	180	Unknown	Not a paired site	8140/3: Adenocarcinoma, NOS	IV	IVB	0	None/Unknown	Yes	No radiation and/or cancer-directed surgery	999	0	98	18	Dead	71	White	Widowed	10	T3	N0	M1b	Alive or dead due to cancer	Dead (attributable to this cancer dx)	Yes	One primary only	Insured	Female
2010	182	Moderately differentiated; Grade II	Not a paired site	8140/3: Adenocarcinoma, NOS	IV	IVB	0	None/Unknown	Yes	No radiation and/or cancer-directed surgery	999	0	98	5	Dead	59	White	Single (never married)	10	TX	N0	M1b	Alive or dead due to cancer	Dead (attributable to this cancer dx)	Yes	One primary only	Insured/No specifics	Male
2010	185	Moderately differentiated; Grade II	Not a paired site	8140/3: Adenocarcinoma, NOS	IV	IVA	30	None/Unknown	Yes	No radiation and/or cancer-directed surgery	999	14	0	43	Dead	59	White	Divorced	20	TX	N0	M1a	Alive or dead due to cancer	Dead (attributable to this cancer dx)	Yes	One primary only	Insured	Female
2010	180	Poorly differentiated; Grade III	Not a paired site	8490/3: Signet ring cell carcinoma	IV	IVB	0	None/Unknown	No/Unknown	No radiation and/or cancer-directed surgery	999	0	98	29	Dead	53	White	Married (including common law)	20	T1	N0	M1b	Alive or dead due to cancer	Dead (attributable to this cancer dx)	Yes	One primary only	Insured	Female
2010	209	Well differentiated; Grade I	Not a paired site	8140/3: Adenocarcinoma, NOS	IIIC	IIIC	0	Beam radiation	Yes	No radiation and/or cancer-directed surgery	86	0	98	7	Dead	79	White	Married (including common law)	20	T4b	N2NOS	M0	Alive or dead due to cancer	Dead (attributable to this cancer dx)	Yes	One primary only	Insured	Female
2010	199	Well differentiated; Grade I	Not a paired site	8140/3: Adenocarcinoma, NOS	IIA	IIA	30	None/Unknown	No/Unknown	No radiation and/or cancer-directed surgery	55	16	0	35	Dead	90	White	Widowed	20	T3	N0	M0	Dead (attributable to causes other than this cancer dx)	Alive or dead of other cause	Yes	One primary only	Insured/No specifics	Female
2010	186	Poorly differentiated; Grade III	Not a paired site	8480/3: Mucinous adenocarcinoma	IV	IVB	41	None/Unknown	Yes	No radiation and/or cancer-directed surgery	38	16	9	14	Dead	44	Black	Divorced	10	T4a	N2b	M1b	Alive or dead due to cancer	Dead (attributable to this cancer dx)	Yes	One primary only	Any Medicaid	Female
2010	186	Moderately differentiated; Grade II	Not a paired site	8140/3: Adenocarcinoma, NOS	IV	IVA	40	None/Unknown	Yes	No radiation and/or cancer-directed surgery	25	7	1	62	Alive	68	White	Married (including common law)	10	T4a	N1a	M1a	Alive or dead due to cancer	Alive or dead of other cause	Yes	One primary only	Insured	Female
2010	209	Moderately differentiated; Grade II	Not a paired site	8140/3: Adenocarcinoma, NOS	IIIB	IIIB	30	Beam radiation	Yes	Radiation after surgery	32	20	1	64	Alive	69	White	Married (including common law)	20	T4a	N1a	M0	Alive or dead due to cancer	Alive or dead of other cause	Yes	One primary only	Insured	Male
2010	187	Poorly differentiated; Grade III	Not a paired site	8490/3: Signet ring cell carcinoma	IV	IVA	40	None/Unknown	No/Unknown	No radiation and/or cancer-directed surgery	35	17	17	4	Dead	52	White	Single (never married)	20	T4a	N2b	M1a	Alive or dead due to cancer	Dead (attributable to this cancer dx)	Yes	One primary only	Insured	Female
2010	182	Unknown	Not a paired site	8140/3: Adenocarcinoma, NOS	IV	IVB	0	Beam radiation	Yes	Radiation after surgery	999	0	98	14	Dead	38	Black	Married (including common law)	20	TX	N0	M1b	Alive or dead due to cancer	Dead (attributable to this cancer dx)	Yes	One primary only	Insured	Male
2010	180	Moderately differentiated; Grade II	Not a paired site	8480/3: Mucinous adenocarcinoma	IIIB	IIIB	30	None/Unknown	Yes	No radiation and/or cancer-directed surgery	45	22	1	65	Alive	78	White	Married (including common law)	20	T3	N1a	M0	Alive or dead due to cancer	Alive or dead of other cause	Yes	One primary only	Any Medicaid	Female
2010	209	Moderately differentiated; Grade II	Not a paired site	8210/3: Adenocarcinoma in adenomatous polyp	IIA	IIA	50	Beam radiation	Yes	Radiation after surgery	56	15	0	61	Alive	69	White	Widowed	20	T3	N0	M0	Alive or dead due to cancer	Alive or dead of other cause	Yes	One primary only	Insured	Female
2010	209	Moderately differentiated; Grade II	Not a paired site	8140/3: Adenocarcinoma, NOS	IV	IVA	0	Beam radiation	No/Unknown	No radiation and/or cancer-directed surgery	40	0	98	21	Dead	62	Black	Married (including common law)	20	T1	N0	M1a	Alive or dead due to cancer	Dead (attributable to this cancer dx)	Yes	One primary only	Insured/No specifics	Female
2010	180	Moderately differentiated; Grade II	Not a paired site	8140/3: Adenocarcinoma, NOS	IV	IVB	0	None/Unknown	Yes	No radiation and/or cancer-directed surgery	999	0	98	38	Dead	57	White	Single (never married)	20	TX	N1NOS	M1b	Alive or dead due to cancer	Dead (attributable to this cancer dx)	Yes	One primary only	Insured	Male
2011	180	Moderately differentiated; Grade II	Not a paired site	8210/3: Adenocarcinoma in adenomatous polyp	I	I	41	None/Unknown	No/Unknown	No radiation and/or cancer-directed surgery	22	16	0	59	Alive	73	White	Widowed	20	T1	N0	M0	N/A not first tumor	N/A not first tumor	Yes	2nd of 2 or more primaries	Insured	Female
2012	180	Moderately differentiated; Grade II	Not a paired site	8140/3: Adenocarcinoma, NOS	IV	IVB	40	None/Unknown	Yes	No radiation and/or cancer-directed surgery	50	6	6	4	Dead	69	White	Widowed	20	T4a	N2a	M1b	N/A not first tumor	N/A not first tumor	Yes	3rd of 3 or more primaries	Insured	Male
2010	180	Moderately differentiated; Grade II	Not a paired site	8263/3: Adenocarcinoma in tubulovillous adenoma	I	I	40	None/Unknown	No/Unknown	No radiation and/or cancer-directed surgery	10	29	0	44	Alive	64	White	Divorced	10	T1	N0	M0	Alive or dead due to cancer	Alive or dead of other cause	Yes	One primary only	Any Medicaid	Female
2010	184	Poorly differentiated; Grade III	Not a paired site	8140/3: Adenocarcinoma, NOS	IIIB	IIIB	30	None/Unknown	No/Unknown	No radiation and/or cancer-directed surgery	40	24	1	38	Dead	75	White	Married (including common law)	20	T4a	N1a	M0	Alive or dead due to cancer	Dead (attributable to this cancer dx)	Yes	One primary only	Insured	Female
2010	180	Well differentiated; Grade I	Not a paired site	8140/3: Adenocarcinoma, NOS	IIIC	IIIC	40	None/Unknown	Yes	No radiation and/or cancer-directed surgery	50	25	5	65	Alive	40	White	Married (including common law)	20	T4a	N2a	M0	Alive or dead due to cancer	Alive or dead of other cause	Yes	One primary only	Insured	Male
2010	182	Moderately differentiated; Grade II	Not a paired site	8140/3: Adenocarcinoma, NOS	IV	IVA	40	None/Unknown	Yes	No radiation and/or cancer-directed surgery	999	18	11	18	Dead	79	White	Married (including common law)	20	T3	N2b	M1a	Alive or dead due to cancer	Dead (attributable to this cancer dx)	Yes	One primary only	Insured	Male
2010	187	Unknown	Not a paired site	8263/3: Adenocarcinoma in tubulovillous adenoma	IV	IVA	32	None/Unknown	Yes	No radiation and/or cancer-directed surgery	27	14	1	61	Alive	49	White	Divorced	20	T2	N1a	M1a	Alive or dead due to cancer	Alive or dead of other cause	Yes	One primary only	Insured	Female
2010	187	Poorly differentiated; Grade III	Not a paired site	8140/3: Adenocarcinoma, NOS	IIIC	IIIC	40	None/Unknown	Yes	No radiation and/or cancer-directed surgery	25	15	8	40	Dead	64	Black	Separated	20	T4a	N2b	M0	Dead (attributable to causes other than this cancer dx)	Alive or dead of other cause	Yes	1st of 2 or more primaries	Any Medicaid	Female
2010	180	Moderately differentiated; Grade II	Not a paired site	8140/3: Adenocarcinoma, NOS	IV	IVA	40	None/Unknown	Yes	No radiation and/or cancer-directed surgery	40	19	6	51	Dead	62	White	Married (including common law)	10	T4a	N2a	M1a	Alive or dead due to cancer	Dead (attributable to this cancer dx)	Yes	One primary only	Insured/No specifics	Female
2010	199	Poorly differentiated; Grade III	Not a paired site	8140/3: Adenocarcinoma, NOS	IV	IVNOS	50	Beam radiation	Yes	Radiation prior to surgery	250	8	2	18	Dead	50	White	Single (never married)	20	T4b	N1b	M1NOS	Alive or dead due to cancer	Dead (attributable to this cancer dx)	Yes	One primary only	Insured	Male
2010	187	Moderately differentiated; Grade II	Not a paired site	8140/3: Adenocarcinoma, NOS	IV	IVA	30	None/Unknown	Yes	No radiation and/or cancer-directed surgery	55	18	1	62	Alive	63	White	Married (including common law)	20	T4a	N1a	M1a	Alive or dead due to cancer	Alive or dead of other cause	Yes	One primary only	Insured	Male
2010	184	Moderately differentiated; Grade II	Not a paired site	8140/3: Adenocarcinoma, NOS	IV	IVA	41	None/Unknown	Yes	No radiation and/or cancer-directed surgery	45	18	0	35	Dead	50	White	Married (including common law)	10	T4b	N1c	M1a	Alive or dead due to cancer	Dead (attributable to this cancer dx)	Yes	One primary only	Insured	Female
2010	209	Moderately differentiated; Grade II	Not a paired site	8140/3: Adenocarcinoma, NOS	IV	IVA	0	None/Unknown	Yes	No radiation and/or cancer-directed surgery	999	0	98	59	Dead	59	White	Divorced	20	T1	N0	M1a	Alive or dead due to cancer	Dead (attributable to this cancer dx)	Yes	One primary only	Any Medicaid	Male
2010	187	Moderately differentiated; Grade II	Not a paired site	8140/3: Adenocarcinoma, NOS	IIIB	IIIB	40	None/Unknown	Yes	No radiation and/or cancer-directed surgery	72	20	2	36	Dead	80	White	Married (including common law)	20	T3	N1b	M0	Alive or dead due to cancer	Dead (attributable to this cancer dx)	Yes	One primary only	Insured	Male
2010	187	Poorly differentiated; Grade III	Not a paired site	8140/3: Adenocarcinoma, NOS	IV	IVB	61	None/Unknown	No/Unknown	No radiation and/or cancer-directed surgery	60	10	0	19	Dead	71	Black	Widowed	10	T4a	N0	M1b	Alive or dead due to cancer	Dead (attributable to this cancer dx)	Yes	One primary only	Insured	Female
2012	187	Moderately differentiated; Grade II	Not a paired site	8140/3: Adenocarcinoma, NOS	IV	IVA	0	None/Unknown	Yes	No radiation and/or cancer-directed surgery	80	0	98	27	Dead	72	White	Married (including common law)	20	TX	NX	M1a	N/A not first tumor	N/A not first tumor	Yes	2nd of 2 or more primaries	Insured	Male
2010	180	Moderately differentiated; Grade II	Not a paired site	8140/3: Adenocarcinoma, NOS	IIIB	IIIB	40	None/Unknown	Yes	No radiation and/or cancer-directed surgery	75	24	1	65	Alive	41	Black	Divorced	10	T4a	N1a	M0	Alive or dead due to cancer	Alive or dead of other cause	Yes	One primary only	Any Medicaid	Male
2010	187	Moderately differentiated; Grade II	Not a paired site	8140/3: Adenocarcinoma, NOS	IIIB	IIIB	30	None/Unknown	Yes	No radiation and/or cancer-directed surgery	65	34	2	4	Dead	73	White	Married (including common law)	10	T3	N1b	M0	Alive or dead due to cancer	Dead (attributable to this cancer dx)	Yes	One primary only	Insured/No specifics	Male
2010	189	Unknown	Not a paired site	8140/3: Adenocarcinoma, NOS	IV	IVNOS	0	None/Unknown	Yes	No radiation and/or cancer-directed surgery	0	0	98	24	Dead	67	White	Married (including common law)	10	T0	N1NOS	M1NOS	Alive or dead due to cancer	Dead (attributable to this cancer dx)	Yes	One primary only	Insured	Male
2010	180	Poorly differentiated; Grade III	Not a paired site	8140/3: Adenocarcinoma, NOS	IIA	IIA	40	None/Unknown	No/Unknown	No radiation and/or cancer-directed surgery	68	19	0	39	Dead	88	White	Widowed	20	T3	N0	M0	Alive or dead due to cancer	Dead (attributable to this cancer dx)	Yes	One primary only	Insured	Female
2010	184	Moderately differentiated; Grade II	Not a paired site	8140/3: Adenocarcinoma, NOS	IV	IVB	30	None/Unknown	Yes	No radiation and/or cancer-directed surgery	115	33	1	68	Alive	76	Black	Married (including common law)	20	T4b	N1a	M1b	Alive or dead due to cancer	Alive or dead of other cause	Yes	1st of 2 or more primaries	Insured	Female
2010	199	Poorly differentiated; Grade III	Not a paired site	8140/3: Adenocarcinoma, NOS	IV	IVB	90	None/Unknown	Yes	No radiation and/or cancer-directed surgery	999	0	98	11	Dead	52	White	Single (never married)	10	T4b	NX	M1b	Alive or dead due to cancer	Dead (attributable to this cancer dx)	Yes	One primary only	Any Medicaid	Male
2010	187	Moderately differentiated; Grade II	Not a paired site	8140/3: Adenocarcinoma, NOS	IV	IVB	0	None/Unknown	Yes	No radiation and/or cancer-directed surgery	50	0	98	63	Dead	68	White	Unknown	20	TX	N1NOS	M1b	Alive or dead due to cancer	Dead (attributable to this cancer dx)	Yes	One primary only	Insurance status unknown	Male
2010	182	Moderately differentiated; Grade II	Not a paired site	8480/3: Mucinous adenocarcinoma	IIIB	IIIB	40	None/Unknown	Yes	No radiation and/or cancer-directed surgery	50	73	1	63	Alive	33	White	Married (including common law)	10	T3	N1a	M0	Alive or dead due to cancer	Alive or dead of other cause	Yes	One primary only	Insured	Female
2010	186	Moderately differentiated; Grade II	Not a paired site	8140/3: Adenocarcinoma, NOS	IIA	IIA	30	None/Unknown	No/Unknown	No radiation and/or cancer-directed surgery	58	16	0	69	Alive	68	White	Divorced	20	T3	N0	M0	Alive or dead due to cancer	Alive or dead of other cause	Yes	One primary only	Insured	Female
2010	209	Moderately differentiated; Grade II	Not a paired site	8140/3: Adenocarcinoma, NOS	IIA	IIA	30	Beam radiation	Yes	Radiation prior to surgery	15	10	0	69	Alive	73	White	Single (never married)	20	T3	N0	M0	Alive or dead due to cancer	Alive or dead of other cause	Yes	One primary only	Insured	Female
2010	209	Moderately differentiated; Grade II	Not a paired site	8140/3: Adenocarcinoma, NOS	I	I	50	Beam radiation	Yes	Radiation prior to surgery	31	15	0	50	Dead	81	White	Married (including common law)	20	T2	N0	M0	Alive or dead due to cancer	Dead (attributable to this cancer dx)	Yes	One primary only	Insured	Male
2011	209	Moderately differentiated; Grade II	Not a paired site	8140/3: Adenocarcinoma, NOS	IIA	IIA	30	Beam radiation	Yes	Radiation after surgery	830	6	0	54	Alive	53	White	Married (including common law)	20	T3	N0	M0	Alive or dead due to cancer	Alive or dead of other cause	Yes	One primary only	Insurance status unknown	Male
2011	209	Moderately differentiated; Grade II	Not a paired site	8140/3: Adenocarcinoma, NOS	IIA	IIA	30	Beam radiation	Yes	Radiation after surgery	54	13	0	40	Dead	76	White	Married (including common law)	10	T3	N0	M0	N/A not first tumor	N/A not first tumor	Yes	2nd of 2 or more primaries	Insured	Male
2011	180	Moderately differentiated; Grade II	Not a paired site	8140/3: Adenocarcinoma, NOS	I	I	40	None/Unknown	No/Unknown	No radiation and/or cancer-directed surgery	25	8	0	8	Dead	62	White	Married (including common law)	20	T2	N0	M0	Dead (attributable to causes other than this cancer dx)	Alive or dead of other cause	Yes	1st of 2 or more primaries	Insured	Female
2011	187	Unknown	Not a paired site	8140/3: Adenocarcinoma, NOS	IV	IVB	0	None/Unknown	Yes	No radiation and/or cancer-directed surgery	30	0	98	9	Dead	39	White	Married (including common law)	20	TX	N0	M1b	Alive or dead due to cancer	Dead (attributable to this cancer dx)	Yes	One primary only	Insured	Female
2011	187	Moderately differentiated; Grade II	Not a paired site	8140/3: Adenocarcinoma, NOS	IV	IVA	32	None/Unknown	Yes	No radiation and/or cancer-directed surgery	40	12	1	25	Dead	60	White	Single (never married)	20	T4a	N1a	M1a	Alive or dead due to cancer	Dead (attributable to this cancer dx)	Yes	One primary only	Insured	Male
2011	184	Moderately differentiated; Grade II	Not a paired site	8140/3: Adenocarcinoma, NOS	IV	IVA	40	None/Unknown	Yes	No radiation and/or cancer-directed surgery	25	34	4	55	Alive	64	White	Married (including common law)	20	T3	N2a	M1a	Alive or dead due to cancer	Alive or dead of other cause	Yes	1st of 2 or more primaries	Insured	Female
2011	184	Poorly differentiated; Grade III	Not a paired site	8140/3: Adenocarcinoma, NOS	IV	IVA	30	None/Unknown	Yes	No radiation and/or cancer-directed surgery	60	39	7	9	Dead	72	White	Widowed	10	T3	N2b	M1a	Alive or dead due to cancer	Dead (attributable to this cancer dx)	Yes	One primary only	Insured	Male
2011	187	Poorly differentiated; Grade III	Not a paired site	8140/3: Adenocarcinoma, NOS	IV	IVA	30	None/Unknown	Yes	No radiation and/or cancer-directed surgery	580	19	6	37	Dead	53	Black	Married (including common law)	10	T3	N2a	M1a	Alive or dead due to cancer	Dead (attributable to this cancer dx)	Yes	One primary only	Insured	Male
2011	187	Moderately differentiated; Grade II	Not a paired site	8140/3: Adenocarcinoma, NOS	I	I	30	None/Unknown	No/Unknown	No radiation and/or cancer-directed surgery	25	5	0	36	Dead	83	White	Married (including common law)	20	T2	N0	M0	Dead (attributable to causes other than this cancer dx)	Alive or dead of other cause	Yes	One primary only	Insured	Female
2011	180	Moderately differentiated; Grade II	Not a paired site	8210/3: Adenocarcinoma in adenomatous polyp	I	I	30	None/Unknown	No/Unknown	No radiation and/or cancer-directed surgery	51	16	0	55	Alive	75	White	Married (including common law)	20	T1	N0	M0	Alive or dead due to cancer	Alive or dead of other cause	Yes	One primary only	Insured	Female
2011	187	Moderately differentiated; Grade II	Not a paired site	8210/3: Adenocarcinoma in adenomatous polyp	I	I	26	None/Unknown	No/Unknown	No radiation and/or cancer-directed surgery	14	0	98	31	Dead	80	White	Separated	20	T1	N0	M0	Dead (attributable to causes other than this cancer dx)	Alive or dead of other cause	Yes	One primary only	Any Medicaid	Male
2011	199	Moderately differentiated; Grade II	Not a paired site	8140/3: Adenocarcinoma, NOS	IV	IVB	0	None/Unknown	Yes	No radiation and/or cancer-directed surgery	999	0	98	24	Dead	54	White	Married (including common law)	20	TX	N1NOS	M1b	Alive or dead due to cancer	Dead (attributable to this cancer dx)	Yes	One primary only	Insured/No specifics	Male
2011	182	Unknown	Not a paired site	8140/3: Adenocarcinoma, NOS	I	I	30	None/Unknown	No/Unknown	No radiation and/or cancer-directed surgery	999	0	98	6	Alive	75	White	Unknown	20	T1	N0	M0	Alive or dead due to cancer	Alive or dead of other cause	Yes	One primary only	Uninsured	Female
2011	187	Moderately differentiated; Grade II	Not a paired site	8140/3: Adenocarcinoma, NOS	IIIC	IIIC	30	None/Unknown	Yes	No radiation and/or cancer-directed surgery	60	30	18	56	Alive	70	White	Single (never married)	20	T3	N2b	M0	Alive or dead due to cancer	Alive or dead of other cause	Yes	One primary only	Insured	Male
2011	182	Moderately differentiated; Grade II	Not a paired site	8140/3: Adenocarcinoma, NOS	IIA	IIA	40	None/Unknown	Yes	No radiation and/or cancer-directed surgery	40	21	0	5	Dead	78	White	Widowed	10	T3	N0	M0	Alive or dead due to cancer	Dead (attributable to this cancer dx)	Yes	One primary only	Insured/No specifics	Female
2011	209	Poorly differentiated; Grade III	Not a paired site	8140/3: Adenocarcinoma, NOS	IIIB	IIIC	70	Beam radiation	Yes	Radiation prior to surgery	70	22	1	52	Alive	43	White	Married (including common law)	10	T4b	N1a	M0	Alive or dead due to cancer	Alive or dead of other cause	Yes	One primary only	Insured	Female
2011	199	Moderately differentiated; Grade II	Not a paired site	8140/3: Adenocarcinoma, NOS	IV	IVA	30	None/Unknown	Yes	No radiation and/or cancer-directed surgery	45	17	3	25	Alive	26	Black	Married (including common law)	10	T3	N1b	M1a	Alive or dead due to cancer	Alive or dead of other cause	Yes	One primary only	Insured	Female
2010	182	Poorly differentiated; Grade III	Not a paired site	8140/3: Adenocarcinoma, NOS	IV	IVB	40	None/Unknown	Yes	No radiation and/or cancer-directed surgery	68	24	15	16	Dead	54	White	Married (including common law)	20	T4a	N2b	M1b	Alive or dead due to cancer	Dead (attributable to this cancer dx)	Yes	One primary only	Insured	Female
2011	209	Well differentiated; Grade I	Not a paired site	8210/3: Adenocarcinoma in adenomatous polyp	IV	IVB	0	Beam radiation	No/Unknown	Radiation after surgery	120	0	98	10	Dead	52	White	Single (never married)	20	T2	N0	M1b	Alive or dead due to cancer	Dead (attributable to this cancer dx)	Yes	One primary only	Uninsured	Female
2011	180	Moderately differentiated; Grade II	Not a paired site	8480/3: Mucinous adenocarcinoma	IIIB	IIIB	40	None/Unknown	Yes	No radiation and/or cancer-directed surgery	60	24	2	23	Dead	72	White	Widowed	10	T4a	N1b	M0	N/A not first tumor	N/A not first tumor	Yes	2nd of 2 or more primaries	Insured	Female
2011	187	Moderately differentiated; Grade II	Not a paired site	8140/3: Adenocarcinoma, NOS	IV	IVB	30	None/Unknown	Yes	No radiation and/or cancer-directed surgery	55	13	13	4	Dead	64	White	Married (including common law)	10	T4NOS	N2b	M1b	Alive or dead due to cancer	Dead (attributable to this cancer dx)	Yes	1st of 2 or more primaries	Insured/No specifics	Male
2011	209	Moderately differentiated; Grade II	Not a paired site	8140/3: Adenocarcinoma, NOS	IV	IVB	0	None/Unknown	Yes	No radiation and/or cancer-directed surgery	130	0	98	23	Dead	48	White	Married (including common law)	20	T3	N1a	M1b	Alive or dead due to cancer	Dead (attributable to this cancer dx)	Yes	One primary only	Insured	Female
2011	183	Poorly differentiated; Grade III	Not a paired site	8510/3: Medullary carcinoma, NOS	IV	IVB	30	None/Unknown	Yes	No radiation and/or cancer-directed surgery	80	28	11	4	Dead	80	White	Widowed	20	T4b	N2b	M1b	Alive or dead due to cancer	Dead (attributable to this cancer dx)	Yes	One primary only	Insured	Female
2011	209	Unknown	Not a paired site	8261/3: Adenocarcinoma in villous adenoma	IV	IVB	0	None/Unknown	Yes	No radiation and/or cancer-directed surgery	8	0	98	23	Dead	48	White	Divorced	20	TX	N0	M1b	Alive or dead due to cancer	Dead (attributable to this cancer dx)	Yes	One primary only	Insurance status unknown	Female
2011	187	Moderately differentiated; Grade II	Not a paired site	8140/3: Adenocarcinoma, NOS	IV	IVB	41	None/Unknown	No/Unknown	No radiation and/or cancer-directed surgery	25	17	14	12	Dead	51	White	Widowed	10	T4b	N2b	M1b	Alive or dead due to cancer	Dead (attributable to this cancer dx)	Yes	One primary only	Insured	Female
2011	199	Moderately differentiated; Grade II	Not a paired site	8140/3: Adenocarcinoma, NOS	IV	IVB	31	Beam radiation	Yes	Radiation after surgery	40	32	10	33	Dead	50	White	Divorced	20	T4b	N2b	M1b	Alive or dead due to cancer	Dead (attributable to this cancer dx)	Yes	One primary only	Insured	Male
2011	184	Poorly differentiated; Grade III	Not a paired site	8140/3: Adenocarcinoma, NOS	IV	IVA	32	None/Unknown	Yes	No radiation and/or cancer-directed surgery	120	51	2	14	Dead	47	White	Married (including common law)	20	T4a	N1b	M1a	Alive or dead due to cancer	Dead (attributable to this cancer dx)	Yes	One primary only	Insured/No specifics	Male
2011	182	Moderately differentiated; Grade II	Not a paired site	8140/3: Adenocarcinoma, NOS	IV	IVA	0	None/Unknown	Yes	No radiation and/or cancer-directed surgery	999	0	98	11	Dead	34	White	Married (including common law)	20	TX	N0	M1a	Alive or dead due to cancer	Dead (attributable to this cancer dx)	Yes	One primary only	Insured/No specifics	Male
2011	180	Moderately differentiated; Grade II	Not a paired site	8140/3: Adenocarcinoma, NOS	IV	IVA	26	None/Unknown	Yes	No radiation and/or cancer-directed surgery	50	0	98	43	Dead	65	White	Divorced	10	T1	N0	M1a	Alive or dead due to cancer	Dead (attributable to this cancer dx)	Yes	One primary only	Insured	Male
2011	180	Moderately differentiated; Grade II	Not a paired site	8140/3: Adenocarcinoma, NOS	IIB	IIB	40	None/Unknown	No/Unknown	No radiation and/or cancer-directed surgery	50	14	0	55	Alive	85	White	Single (never married)	20	T4a	N0	M0	Alive or dead due to cancer	Alive or dead of other cause	Yes	One primary only	Insured	Female
2011	182	Moderately differentiated; Grade II	Not a paired site	8140/3: Adenocarcinoma, NOS	IIIB	IIIB	40	None/Unknown	Yes	No radiation and/or cancer-directed surgery	52	23	3	56	Alive	47	White	Married (including common law)	20	T4a	N1b	M0	Alive or dead due to cancer	Alive or dead of other cause	Yes	One primary only	Insured	Male
2011	209	Poorly differentiated; Grade III	Not a paired site	8140/3: Adenocarcinoma, NOS	IIIB	IIIB	30	Beam radiation	Yes	Radiation prior to surgery	18	18	0	59	Alive	68	White	Single (never married)	10	T3	N1NOS	M0	Alive or dead due to cancer	Alive or dead of other cause	Yes	One primary only	Insured	Male
2010	187	Moderately differentiated; Grade II	Not a paired site	8140/3: Adenocarcinoma, NOS	IIIB	IIIB	30	None/Unknown	Yes	No radiation and/or cancer-directed surgery	70	24	1	60	Alive	51	White	Single (never married)	20	T4a	N1a	M0	Alive or dead due to cancer	Alive or dead of other cause	Yes	1st of 2 or more primaries	Any Medicaid	Female
2011	186	Moderately differentiated; Grade II	Not a paired site	8140/3: Adenocarcinoma, NOS	IIIB	IIIB	30	None/Unknown	Yes	No radiation and/or cancer-directed surgery	30	20	1	56	Alive	60	Black	Married (including common law)	20	T3	N1a	M0	Alive or dead due to cancer	Alive or dead of other cause	Yes	One primary only	Insured	Female
2011	209	Moderately differentiated; Grade II	Not a paired site	8140/3: Adenocarcinoma, NOS	IV	IVB	30	None/Unknown	Yes	No radiation and/or cancer-directed surgery	70	2	1	8	Dead	37	White	Married (including common law)	20	T3	N1NOS	M1b	Dead (attributable to causes other than this cancer dx)	Alive or dead of other cause	Yes	1st of 2 or more primaries	Insured	Female
2011	183	Moderately differentiated; Grade II	Not a paired site	8140/3: Adenocarcinoma, NOS	IIIC	IIIC	40	None/Unknown	Yes	No radiation and/or cancer-directed surgery	60	22	11	16	Dead	74	White	Divorced	20	T4a	N2b	M0	Alive or dead due to cancer	Dead (attributable to this cancer dx)	Yes	One primary only	Any Medicaid	Female
2011	187	Moderately differentiated; Grade II	Not a paired site	8140/3: Adenocarcinoma, NOS	IV	IVB	30	None/Unknown	Yes	No radiation and/or cancer-directed surgery	40	0	98	17	Dead	40	White	Married (including common law)	20	T2	N0	M1b	Alive or dead due to cancer	Dead (attributable to this cancer dx)	Yes	One primary only	Insured	Female
2011	183	Moderately differentiated; Grade II	Not a paired site	8140/3: Adenocarcinoma, NOS	IV	IVA	40	None/Unknown	Yes	No radiation and/or cancer-directed surgery	44	10	2	21	Dead	75	White	Married (including common law)	10	T3	N1b	M1a	Alive or dead due to cancer	Dead (attributable to this cancer dx)	Yes	One primary only	Insured	Male
2011	199	Moderately differentiated; Grade II	Not a paired site	8140/3: Adenocarcinoma, NOS	IV	IVA	30	None/Unknown	No/Unknown	No radiation and/or cancer-directed surgery	999	16	4	26	Dead	88	Black	Married (including common law)	10	T3	N2a	M1a	Alive or dead due to cancer	Dead (attributable to this cancer dx)	Yes	One primary only	Any Medicaid	Male
2011	182	Moderately differentiated; Grade II	Not a paired site	8140/3: Adenocarcinoma, NOS	IIA	IIA	40	None/Unknown	No/Unknown	No radiation and/or cancer-directed surgery	60	13	0	54	Alive	53	Unknown	Married (including common law)	10	T3	N0	M0	Alive or dead due to cancer	Alive or dead of other cause	Yes	One primary only	Insured	Male
2011	184	Unknown	Not a paired site	8263/3: Adenocarcinoma in tubulovillous adenoma	IV	IVA	30	None/Unknown	No/Unknown	No radiation and/or cancer-directed surgery	85	14	12	12	Dead	50	Black	Single (never married)	10	T3	N2b	M1a	Alive or dead due to cancer	Dead (attributable to this cancer dx)	Yes	One primary only	Any Medicaid	Female
2011	187	Poorly differentiated; Grade III	Not a paired site	8140/3: Adenocarcinoma, NOS	IV	IVB	0	None/Unknown	Yes	No radiation and/or cancer-directed surgery	999	0	98	6	Dead	76	White	Single (never married)	10	T1	N1NOS	M1b	Alive or dead due to cancer	Dead (attributable to this cancer dx)	Yes	One primary only	Insured/No specifics	Male
2011	180	Moderately differentiated; Grade II	Not a paired site	8480/3: Mucinous adenocarcinoma	IV	IVB	40	None/Unknown	Yes	No radiation and/or cancer-directed surgery	37	24	0	24	Dead	56	White	Married (including common law)	20	T3	N0	M1b	Alive or dead due to cancer	Dead (attributable to this cancer dx)	Yes	One primary only	Insured	Female
2011	182	Moderately differentiated; Grade II	Not a paired site	8140/3: Adenocarcinoma, NOS	IIIA	IIIA	0	None/Unknown	Yes	No radiation and/or cancer-directed surgery	999	95	95	21	Dead	52	Black	Widowed	10	T1	N1NOS	M0	Alive or dead due to cancer	Dead (attributable to this cancer dx)	Yes	One primary only	Insured	Female
2011	187	Moderately differentiated; Grade II	Not a paired site	8140/3: Adenocarcinoma, NOS	IV	IVB	30	None/Unknown	Yes	No radiation and/or cancer-directed surgery	65	31	2	51	Alive	84	White	Widowed	20	T3	N1b	M1b	Alive or dead due to cancer	Alive or dead of other cause	Yes	One primary only	Insured	Female
2011	187	Poorly differentiated; Grade III	Not a paired site	8140/3: Adenocarcinoma, NOS	IV	IVA	40	None/Unknown	Yes	No radiation and/or cancer-directed surgery	85	19	5	34	Dead	65	White	Divorced	20	T4b	N2a	M1a	Alive or dead due to cancer	Dead (attributable to this cancer dx)	Yes	One primary only	Insured/No specifics	Female
2011	209	Unknown	Not a paired site	8490/3: Signet ring cell carcinoma	IIIC	IIIC	50	Beam radiation	Yes	Radiation prior to surgery	95	14	10	56	Alive	48	Black	Divorced	20	T4b	N2b	M0	Alive or dead due to cancer	Alive or dead of other cause	Yes	One primary only	Any Medicaid	Male
2011	187	Moderately differentiated; Grade II	Not a paired site	8140/3: Adenocarcinoma, NOS	IV	IVA	0	None/Unknown	Yes	No radiation and/or cancer-directed surgery	999	0	98	11	Dead	46	Black	Divorced	10	TX	N0	M1a	Alive or dead due to cancer	Dead (attributable to this cancer dx)	Yes	One primary only	Any Medicaid	Female
2011	187	Moderately differentiated; Grade II	Not a paired site	8140/3: Adenocarcinoma, NOS	IIIB	IIIC	30	None/Unknown	Yes	No radiation and/or cancer-directed surgery	55	31	1	59	Alive	49	White	Married (including common law)	20	T4b	N1a	M0	Alive or dead due to cancer	Alive or dead of other cause	Yes	One primary only	Insured	Female
2011	182	Poorly differentiated; Grade III	Not a paired site	8140/3: Adenocarcinoma, NOS	I	I	30	None/Unknown	No/Unknown	No radiation and/or cancer-directed surgery	26	35	0	53	Alive	59	White	Married (including common law)	10	T1	N0	M0	Alive or dead due to cancer	Alive or dead of other cause	Yes	One primary only	Insured/No specifics	Male
2011	187	Poorly differentiated; Grade III	Not a paired site	8140/3: Adenocarcinoma, NOS	IV	IVA	30	None/Unknown	Yes	No radiation and/or cancer-directed surgery	32	29	7	10	Dead	64	Black	Single (never married)	20	T4a	N2b	M1a	Alive or dead due to cancer	Dead (attributable to this cancer dx)	Yes	One primary only	Any Medicaid	Female
2011	199	Moderately differentiated; Grade II	Not a paired site	8140/3: Adenocarcinoma, NOS	IIIC	IIIC	66	None/Unknown	Yes	No radiation and/or cancer-directed surgery	55	71	8	15	Dead	30	White	Married (including common law)	10	T4a	N2b	M0	N/A not first tumor	N/A not first tumor	Yes	2nd of 2 or more primaries	Insured	Female
2011	182	Poorly differentiated; Grade III	Not a paired site	8140/3: Adenocarcinoma, NOS	IIA	IIA	40	None/Unknown	No/Unknown	No radiation and/or cancer-directed surgery	55	26	0	45	Dead	91	White	Widowed	20	T3	N0	M0	Dead (attributable to causes other than this cancer dx)	Alive or dead of other cause	Yes	One primary only	Insured	Female
2011	182	Well differentiated; Grade I	Not a paired site	8263/3: Adenocarcinoma in tubulovillous adenoma	IIA	IIA	30	None/Unknown	No/Unknown	No radiation and/or cancer-directed surgery	12	21	0	53	Alive	63	White	Married (including common law)	20	T3	N0	M0	Alive or dead due to cancer	Alive or dead of other cause	Yes	One primary only	Insured/No specifics	Male
2011	182	Well differentiated; Grade I	Not a paired site	8140/3: Adenocarcinoma, NOS	IIA	IIA	40	None/Unknown	No/Unknown	No radiation and/or cancer-directed surgery	72	32	0	52	Dead	74	White	Married (including common law)	10	T3	N0	M0	Dead (attributable to causes other than this cancer dx)	Alive or dead of other cause	Yes	One primary only	Insured	Male
2011	180	Poorly differentiated; Grade III	Not a paired site	8140/3: Adenocarcinoma, NOS	IIA	IIA	30	None/Unknown	No/Unknown	No radiation and/or cancer-directed surgery	65	20	0	55	Alive	70	White	Divorced	20	T3	N0	M0	Alive or dead due to cancer	Alive or dead of other cause	Yes	One primary only	Insured/No specifics	Female
2011	182	Moderately differentiated; Grade II	Not a paired site	8140/3: Adenocarcinoma, NOS	I	I	30	None/Unknown	No/Unknown	No radiation and/or cancer-directed surgery	38	28	0	55	Alive	84	White	Widowed	20	T2	N0	M0	Alive or dead due to cancer	Alive or dead of other cause	Yes	One primary only	Insured	Female
2011	187	Moderately differentiated; Grade II	Not a paired site	8140/3: Adenocarcinoma, NOS	IIIB	IIIB	30	Beam radiation	Yes	Radiation after surgery	33	16	1	40	Dead	86	White	Widowed	20	T3	N1a	M0	Dead (attributable to causes other than this cancer dx)	Alive or dead of other cause	Yes	1st of 2 or more primaries	Insured	Male
2011	184	Moderately differentiated; Grade II	Not a paired site	8140/3: Adenocarcinoma, NOS	IV	IVA	30	None/Unknown	Yes	No radiation and/or cancer-directed surgery	55	53	3	55	Alive	31	Black	Married (including common law)	20	T3	N1b	M1a	Alive or dead due to cancer	Alive or dead of other cause	Yes	One primary only	Insured	Male
2011	182	Moderately differentiated; Grade II	Not a paired site	8140/3: Adenocarcinoma, NOS	I	I	30	None/Unknown	No/Unknown	No radiation and/or cancer-directed surgery	25	19	0	53	Alive	72	White	Married (including common law)	20	T2	N0	M0	Alive or dead due to cancer	Alive or dead of other cause	Yes	One primary only	Insured	Male
2011	199	Moderately differentiated; Grade II	Not a paired site	8140/3: Adenocarcinoma, NOS	IIB	IIB	30	Beam radiation	Yes	Radiation after surgery	30	7	0	55	Alive	48	Asian or Pacific Islander	Married (including common law)	10	T4a	N0	M0	Alive or dead due to cancer	Alive or dead of other cause	Yes	One primary only	Insured	Female
2011	182	Moderately differentiated; Grade II	Not a paired site	8210/3: Adenocarcinoma in adenomatous polyp	I	I	40	None/Unknown	No/Unknown	No radiation and/or cancer-directed surgery	3	16	0	57	Alive	64	White	Divorced	20	T1	N0	M0	Alive or dead due to cancer	Alive or dead of other cause	Yes	One primary only	Insured/No specifics	Male
2011	180	Moderately differentiated; Grade II	Not a paired site	8140/3: Adenocarcinoma, NOS	IV	IVA	40	None/Unknown	Yes	No radiation and/or cancer-directed surgery	70	25	10	36	Dead	28	White	Married (including common law)	10	T3	N2b	M1a	Alive or dead due to cancer	Dead (attributable to this cancer dx)	Yes	One primary only	Insured	Female
2011	187	Well differentiated; Grade I	Not a paired site	8140/3: Adenocarcinoma, NOS	IIA	IIA	40	None/Unknown	No/Unknown	No radiation and/or cancer-directed surgery	60	32	0	54	Alive	76	White	Widowed	20	T3	N0	M0	Alive or dead due to cancer	Alive or dead of other cause	Yes	One primary only	Insured	Female
2011	209	Poorly differentiated; Grade III	Not a paired site	8261/3: Adenocarcinoma in villous adenoma	IV	IVB	0	None/Unknown	Yes	No radiation and/or cancer-directed surgery	999	0	98	13	Dead	67	White	Married (including common law)	20	T3	N1NOS	M1b	Alive or dead due to cancer	Dead (attributable to this cancer dx)	Yes	One primary only	Insured/No specifics	Female
2011	180	Moderately differentiated; Grade II	Not a paired site	8140/3: Adenocarcinoma, NOS	IIIC	IIIC	30	None/Unknown	Yes	No radiation and/or cancer-directed surgery	90	15	7	52	Alive	64	White	Married (including common law)	10	T3	N2b	M0	Alive or dead due to cancer	Alive or dead of other cause	Yes	1st of 2 or more primaries	Insured/No specifics	Female
2011	184	Moderately differentiated; Grade II	Not a paired site	8140/3: Adenocarcinoma, NOS	IIIC	IIIC	30	None/Unknown	Yes	No radiation and/or cancer-directed surgery	35	15	7	52	Alive	64	White	Married (including common law)	10	T3	N2b	M0	N/A not first tumor	N/A not first tumor	No	2nd of 2 or more primaries	Insured/No specifics	Female
2011	183	Moderately differentiated; Grade II	Not a paired site	8140/3: Adenocarcinoma, NOS	IIIB	IIIB	30	None/Unknown	Yes	No radiation and/or cancer-directed surgery	48	20	2	49	Dead	63	White	Married (including common law)	20	T3	N1b	M0	Alive or dead due to cancer	Dead (attributable to this cancer dx)	Yes	One primary only	Insured	Male
2011	184	Moderately differentiated; Grade II	Not a paired site	8140/3: Adenocarcinoma, NOS	IIIA	IIIA	40	None/Unknown	No/Unknown	No radiation and/or cancer-directed surgery	30	20	1	43	Dead	86	White	Widowed	20	T2	N1a	M0	Dead (attributable to causes other than this cancer dx)	Alive or dead of other cause	Yes	One primary only	Any Medicaid	Female
2011	209	Poorly differentiated; Grade III	Not a paired site	8140/3: Adenocarcinoma, NOS	IIA	IIA	50	Beam radiation	Yes	Radiation prior to surgery	999	3	0	51	Alive	76	White	Married (including common law)	20	T3	N0	M0	Alive or dead due to cancer	Alive or dead of other cause	Yes	One primary only	Insured	Male
2011	180	Moderately differentiated; Grade II	Not a paired site	8140/3: Adenocarcinoma, NOS	IIIC	IIIC	40	None/Unknown	Yes	No radiation and/or cancer-directed surgery	60	34	9	33	Dead	55	White	Married (including common law)	10	T3	N2b	M0	Alive or dead due to cancer	Dead (attributable to this cancer dx)	Yes	One primary only	Insured	Male
2011	182	Moderately differentiated; Grade II	Not a paired site	8140/3: Adenocarcinoma, NOS	I	I	30	None/Unknown	No/Unknown	No radiation and/or cancer-directed surgery	25	15	0	50	Alive	93	White	Married (including common law)	20	T1	N0	M0	Alive or dead due to cancer	Alive or dead of other cause	Yes	One primary only	Insured/No specifics	Female
2011	209	Poorly differentiated; Grade III	Not a paired site	8140/3: Adenocarcinoma, NOS	IIIC	IIIC	50	Beam radiation	Yes	Radiation after surgery	65	28	18	21	Dead	67	White	Married (including common law)	20	T3	N2b	M0	Alive or dead due to cancer	Dead (attributable to this cancer dx)	Yes	1st of 2 or more primaries	Insured/No specifics	Male
2012	182	Moderately differentiated; Grade II	Not a paired site	8263/3: Adenocarcinoma in tubulovillous adenoma	IIIB	IIIB	30	None/Unknown	No/Unknown	No radiation and/or cancer-directed surgery	38	34	9	12	Dead	67	White	Unknown	10	T3	N1NOS	M0	N/A not first tumor	N/A not first tumor	Yes	2nd of 2 or more primaries	Insured	Male
2011	180	Moderately differentiated; Grade II	Not a paired site	8140/3: Adenocarcinoma, NOS	IIIB	IIIB	30	None/Unknown	Yes	No radiation and/or cancer-directed surgery	38	21	2	57	Alive	64	White	Widowed	20	T3	N1b	M0	Alive or dead due to cancer	Alive or dead of other cause	Yes	One primary only	Insured/No specifics	Male
2011	182	Moderately differentiated; Grade II	Not a paired site	8140/3: Adenocarcinoma, NOS	IIB	IIC	41	None/Unknown	Yes	No radiation and/or cancer-directed surgery	80	12	0	22	Dead	78	White	Married (including common law)	20	T4b	N0	M0	Alive or dead due to cancer	Dead (attributable to this cancer dx)	Yes	One primary only	Insured/No specifics	Male
2011	180	Moderately differentiated; Grade II	Not a paired site	8140/3: Adenocarcinoma, NOS	IIIB	IIIB	40	None/Unknown	No/Unknown	No radiation and/or cancer-directed surgery	40	14	2	28	Dead	84	White	Married (including common law)	20	T3	N1b	M0	Alive or dead due to cancer	Dead (attributable to this cancer dx)	Yes	One primary only	Insured	Male
2011	182	Well differentiated; Grade I	Not a paired site	8140/3: Adenocarcinoma, NOS	I	I	40	None/Unknown	No/Unknown	No radiation and/or cancer-directed surgery	17	19	0	49	Alive	50	White	Married (including common law)	20	T1	N0	M0	Alive or dead due to cancer	Alive or dead of other cause	Yes	One primary only	Insured	Female
2011	209	Moderately differentiated; Grade II	Not a paired site	8140/3: Adenocarcinoma, NOS	IIIB	IIIB	30	Beam radiation	Yes	Radiation prior to surgery	51	15	0	50	Alive	39	White	Married (including common law)	20	T3	N1NOS	M0	Alive or dead due to cancer	Alive or dead of other cause	Yes	One primary only	Insured	Male
2011	183	Well differentiated; Grade I	Not a paired site	8140/3: Adenocarcinoma, NOS	IIA	IIA	30	None/Unknown	No/Unknown	No radiation and/or cancer-directed surgery	19	7	0	49	Alive	73	White	Widowed	20	T3	N0	M0	Alive or dead due to cancer	Alive or dead of other cause	Yes	One primary only	Insured	Male
2012	184	Poorly differentiated; Grade III	Right - origin of primary	8140/3: Adenocarcinoma, NOS	IIIB	IIIB	30	None/Unknown	No/Unknown	No radiation and/or cancer-directed surgery	22	26	2	46	Alive	64	White	Married (including common law)	10	T3	N1b	M0	N/A not first tumor	N/A not first tumor	Yes	2nd of 2 or more primaries	Insured	Female
2012	182	Poorly differentiated; Grade III	Not a paired site	8140/3: Adenocarcinoma, NOS	IIIB	IIIB	30	None/Unknown	Yes	No radiation and/or cancer-directed surgery	22	26	2	45	Alive	64	White	Married (including common law)	10	T3	N1b	M0	N/A not first tumor	N/A not first tumor	No	3rd of 3 or more primaries	Insured	Female
2011	187	Moderately differentiated; Grade II	Not a paired site	8140/3: Adenocarcinoma, NOS	IV	IVA	30	None/Unknown	Yes	No radiation and/or cancer-directed surgery	123	18	0	50	Alive	64	White	Widowed	20	T4a	N0	M1a	Alive or dead due to cancer	Alive or dead of other cause	Yes	One primary only	Insured	Male
2011	186	Moderately differentiated; Grade II	Not a paired site	8140/3: Adenocarcinoma, NOS	IIB	IIB	40	None/Unknown	No/Unknown	No radiation and/or cancer-directed surgery	50	19	0	25	Dead	79	White	Married (including common law)	10	T4a	N0	M0	Alive or dead due to cancer	Dead (attributable to this cancer dx)	Yes	One primary only	Insured	Male
2011	187	Moderately differentiated; Grade II	Not a paired site	8140/3: Adenocarcinoma, NOS	IIIA	IIIA	30	None/Unknown	No/Unknown	No radiation and/or cancer-directed surgery	33	18	1	46	Dead	74	White	Widowed	20	T1	N1a	M0	N/A not first tumor	N/A not first tumor	Yes	2nd of 2 or more primaries	Insured	Male
2011	187	Moderately differentiated; Grade II	Not a paired site	8140/3: Adenocarcinoma, NOS	IV	IVA	30	None/Unknown	Yes	No radiation and/or cancer-directed surgery	50	22	0	50	Alive	77	American Indian/Alaska Native	Divorced	10	T4a	N0	M1a	Alive or dead due to cancer	Alive or dead of other cause	Yes	One primary only	Any Medicaid	Female
2011	182	Moderately differentiated; Grade II	Not a paired site	8140/3: Adenocarcinoma, NOS	IIA	IIA	40	None/Unknown	No/Unknown	No radiation and/or cancer-directed surgery	45	27	0	6	Dead	76	White	Married (including common law)	20	T3	N0	M0	Dead (attributable to causes other than this cancer dx)	Alive or dead of other cause	Yes	1st of 2 or more primaries	Insured	Female
2011	187	Moderately differentiated; Grade II	Not a paired site	8140/3: Adenocarcinoma, NOS	IIIC	IIIB	30	None/Unknown	Yes	No radiation and/or cancer-directed surgery	25	17	4	49	Alive	58	White	Married (including common law)	20	T3	N2a	M0	Alive or dead due to cancer	Alive or dead of other cause	Yes	One primary only	Insured	Male
2011	180	Moderately differentiated; Grade II	Not a paired site	8140/3: Adenocarcinoma, NOS	IIA	IIA	30	None/Unknown	No/Unknown	No radiation and/or cancer-directed surgery	28	21	0	49	Alive	59	White	Married (including common law)	20	T3	N0	M0	Alive or dead due to cancer	Alive or dead of other cause	Yes	One primary only	Insured/No specifics	Male
2011	187	Unknown	Not a paired site	8140/3: Adenocarcinoma, NOS	IV	IVA	0	None/Unknown	Yes	No radiation and/or cancer-directed surgery	60	0	98	9	Dead	85	White	Married (including common law)	20	TX	N1NOS	M1a	Alive or dead due to cancer	Dead (attributable to this cancer dx)	Yes	One primary only	Insured/No specifics	Female
2011	180	Poorly differentiated; Grade III	Not a paired site	8480/3: Mucinous adenocarcinoma	IIA	IIA	40	None/Unknown	No/Unknown	No radiation and/or cancer-directed surgery	85	50	0	50	Alive	82	White	Widowed	20	T3	N0	M0	Alive or dead due to cancer	Alive or dead of other cause	Yes	One primary only	Insured/No specifics	Female
2011	182	Moderately differentiated; Grade II	Not a paired site	8140/3: Adenocarcinoma, NOS	I	I	30	None/Unknown	No/Unknown	No radiation and/or cancer-directed surgery	999	30	0	59	Alive	78	White	Divorced	20	T1	N0	M0	Alive or dead due to cancer	Alive or dead of other cause	Yes	One primary only	Insured	Male
2011	180	Moderately differentiated; Grade II	Not a paired site	8140/3: Adenocarcinoma, NOS	IV	IVA	40	None/Unknown	Yes	No radiation and/or cancer-directed surgery	10	33	31	45	Dead	50	White	Married (including common law)	10	T3	N2b	M1a	Alive or dead due to cancer	Dead (attributable to this cancer dx)	Yes	1st of 2 or more primaries	Insured	Male
2011	199	Unknown	Not a paired site	8140/3: Adenocarcinoma, NOS	IV	IVA	0	Beam radiation	Yes	No radiation and/or cancer-directed surgery	999	0	98	10	Dead	61	White	Married (including common law)	10	TX	N0	M1a	N/A not first tumor	N/A not first tumor	No	2nd of 2 or more primaries	Insurance status unknown	Male
2011	180	Moderately differentiated; Grade II	Not a paired site	8140/3: Adenocarcinoma, NOS	IV	IVA	40	None/Unknown	Yes	No radiation and/or cancer-directed surgery	69	12	4	53	Alive	52	Black	Married (including common law)	10	T3	N2a	M1a	Alive or dead due to cancer	Alive or dead of other cause	Yes	One primary only	Any Medicaid	Male
2011	187	Moderately differentiated; Grade II	Not a paired site	8140/3: Adenocarcinoma, NOS	IV	IVA	0	None/Unknown	Yes	No radiation and/or cancer-directed surgery	51	0	98	42	Dead	53	White	Married (including common law)	20	T1	N0	M1a	Alive or dead due to cancer	Dead (attributable to this cancer dx)	Yes	One primary only	Insured	Female
2011	187	Poorly differentiated; Grade III	Not a paired site	8140/3: Adenocarcinoma, NOS	IV	IVB	30	None/Unknown	Yes	No radiation and/or cancer-directed surgery	30	23	21	23	Dead	58	White	Married (including common law)	20	T4a	N2b	M1b	Alive or dead due to cancer	Dead (attributable to this cancer dx)	Yes	One primary only	Insured	Male
2011	209	Moderately differentiated; Grade II	Not a paired site	8140/3: Adenocarcinoma, NOS	IV	IVB	0	None/Unknown	Yes	No radiation and/or cancer-directed surgery	999	0	98	21	Dead	47	White	Divorced	10	T3	N1NOS	M1b	Alive or dead due to cancer	Dead (attributable to this cancer dx)	Yes	One primary only	Insured	Male
2011	186	Moderately differentiated; Grade II	Not a paired site	8140/3: Adenocarcinoma, NOS	IV	IVB	40	None/Unknown	Yes	No radiation and/or cancer-directed surgery	62	16	1	31	Dead	67	White	Married (including common law)	10	T4b	N1a	M1b	Alive or dead due to cancer	Dead (attributable to this cancer dx)	Yes	One primary only	Insured/No specifics	Male
2011	187	Poorly differentiated; Grade III	Not a paired site	8140/3: Adenocarcinoma, NOS	IV	IVB	0	None/Unknown	Yes	No radiation and/or cancer-directed surgery	50	0	98	55	Alive	41	White	Married (including common law)	20	TX	N1a	M1b	Alive or dead due to cancer	Alive or dead of other cause	Yes	One primary only	Insured	Male
2011	209	Poorly differentiated; Grade III	Not a paired site	8140/3: Adenocarcinoma, NOS	IIIC	IIIC	50	Beam radiation	Yes	Radiation prior to surgery	35	17	8	52	Dead	40	White	Married (including common law)	10	T3	N2b	M0	Alive or dead due to cancer	Dead (attributable to this cancer dx)	Yes	One primary only	Insured	Male
2011	199	Moderately differentiated; Grade II	Not a paired site	8140/3: Adenocarcinoma, NOS	IV	IVA	0	None/Unknown	Yes	No radiation and/or cancer-directed surgery	999	0	98	5	Dead	73	White	Widowed	10	TX	N0	M1a	Alive or dead due to cancer	Dead (attributable to this cancer dx)	Yes	1st of 2 or more primaries	Any Medicaid	Female
2011	182	Moderately differentiated; Grade II	Not a paired site	8263/3: Adenocarcinoma in tubulovillous adenoma	I	I	28	None/Unknown	No/Unknown	No radiation and/or cancer-directed surgery	9	0	98	4	Dead	73	White	Widowed	10	T1	N0	M0	N/A not first tumor	N/A not first tumor	Yes	2nd of 2 or more primaries	Any Medicaid	Female
2011	180	Moderately differentiated; Grade II	Not a paired site	8140/3: Adenocarcinoma, NOS	IV	IVA	40	None/Unknown	Yes	No radiation and/or cancer-directed surgery	55	16	0	50	Alive	54	White	Married (including common law)	10	T3	N0	M1a	Alive or dead due to cancer	Alive or dead of other cause	Yes	1st of 2 or more primaries	Insured	Male
2011	182	Moderately differentiated; Grade II	Not a paired site	8210/3: Adenocarcinoma in adenomatous polyp	I	I	40	None/Unknown	No/Unknown	No radiation and/or cancer-directed surgery	10	16	0	49	Alive	54	White	Married (including common law)	10	T1	N0	M0	N/A not first tumor	N/A not first tumor	No	2nd of 2 or more primaries	Insured	Male
2011	184	Moderately differentiated; Grade II	Not a paired site	8140/3: Adenocarcinoma, NOS	IIIB	IIIB	40	None/Unknown	Yes	No radiation and/or cancer-directed surgery	37	28	2	50	Alive	41	White	Divorced	20	T3	N1b	M0	Alive or dead due to cancer	Alive or dead of other cause	Yes	One primary only	Any Medicaid	Male
2011	184	Poorly differentiated; Grade III	Not a paired site	8255/3: Adenocarcinoma with mixed subtypes	IIIB	IIIB	41	None/Unknown	Yes	No radiation and/or cancer-directed surgery	155	29	1	28	Dead	67	White	Married (including common law)	20	T4a	N1a	M0	Dead (attributable to causes other than this cancer dx)	Alive or dead of other cause	Yes	One primary only	Insured	Male
2011	184	Poorly differentiated; Grade III	Not a paired site	8140/3: Adenocarcinoma, NOS	IV	IVB	40	None/Unknown	Yes	No radiation and/or cancer-directed surgery	75	20	3	21	Dead	83	White	Married (including common law)	20	T4a	N1b	M1b	Alive or dead due to cancer	Dead (attributable to this cancer dx)	Yes	One primary only	Insured	Male
2011	186	Moderately differentiated; Grade II	Not a paired site	8140/3: Adenocarcinoma, NOS	IV	IVA	30	None/Unknown	Yes	No radiation and/or cancer-directed surgery	50	30	3	20	Dead	55	White	Married (including common law)	10	T4a	N1b	M1a	Alive or dead due to cancer	Dead (attributable to this cancer dx)	Yes	One primary only	Insured	Male
2011	180	Moderately differentiated; Grade II	Not a paired site	8140/3: Adenocarcinoma, NOS	IV	IVB	40	None/Unknown	Yes	No radiation and/or cancer-directed surgery	80	18	0	59	Alive	65	White	Married (including common law)	10	T3	N0	M1b	Alive or dead due to cancer	Alive or dead of other cause	Yes	One primary only	Insured	Male
2011	187	Poorly differentiated; Grade III	Not a paired site	8560/3: Adenosquamous carcinoma	IV	IVB	70	None/Unknown	Yes	No radiation and/or cancer-directed surgery	38	24	3	55	Alive	79	White	Married (including common law)	20	T4b	N1b	M1b	Alive or dead due to cancer	Alive or dead of other cause	Yes	One primary only	Insured	Female
2011	180	Poorly differentiated; Grade III	Not a paired site	8140/3: Adenocarcinoma, NOS	IV	IVA	30	None/Unknown	Yes	No radiation and/or cancer-directed surgery	55	36	0	21	Dead	81	White	Divorced	20	T3	N0	M1a	Alive or dead due to cancer	Dead (attributable to this cancer dx)	Yes	One primary only	Any Medicaid	Female
2011	199	Poorly differentiated; Grade III	Not a paired site	8140/3: Adenocarcinoma, NOS	IV	IVB	30	None/Unknown	Yes	No radiation and/or cancer-directed surgery	60	22	8	8	Dead	67	White	Married (including common law)	10	T3	N2b	M1b	Alive or dead due to cancer	Dead (attributable to this cancer dx)	Yes	One primary only	Insured	Male
2011	209	Moderately differentiated; Grade II	Not a paired site	8140/3: Adenocarcinoma, NOS	IIIB	IIIB	40	None/Unknown	No/Unknown	No radiation and/or cancer-directed surgery	55	38	3	39	Dead	55	White	Married (including common law)	10	T3	N1b	M0	Alive or dead due to cancer	Dead (attributable to this cancer dx)	Yes	One primary only	Insurance status unknown	Male
2011	183	Moderately differentiated; Grade II	Not a paired site	8140/3: Adenocarcinoma, NOS	UNK Stage	UNK Stage	0	None/Unknown	No/Unknown	No radiation and/or cancer-directed surgery	999	0	98	14	Dead	89	White	Divorced	20	TX	N0	M0	Alive or dead due to cancer	Dead (attributable to this cancer dx)	Yes	One primary only	Any Medicaid	Male
2011	184	Well differentiated; Grade I	Not a paired site	8480/3: Mucinous adenocarcinoma	IIA	IIA	40	None/Unknown	No/Unknown	No radiation and/or cancer-directed surgery	65	4	0	37	Dead	83	White	Married (including common law)	20	T3	N0	M0	Dead (attributable to causes other than this cancer dx)	Alive or dead of other cause	Yes	One primary only	Insured	Male
2011	187	Moderately differentiated; Grade II	Not a paired site	8140/3: Adenocarcinoma, NOS	IIIC	IIIA	30	None/Unknown	No/Unknown	No radiation and/or cancer-directed surgery	25	20	6	58	Alive	62	White	Married (including common law)	10	T1	N2a	M0	Alive or dead due to cancer	Alive or dead of other cause	Yes	One primary only	Insured	Male
2011	187	Moderately differentiated; Grade II	Not a paired site	8140/3: Adenocarcinoma, NOS	IV	IVA	30	None/Unknown	Yes	No radiation and/or cancer-directed surgery	45	22	4	57	Alive	66	White	Divorced	10	T3	N2a	M1a	Alive or dead due to cancer	Alive or dead of other cause	Yes	One primary only	Any Medicaid	Female
2011	187	Moderately differentiated; Grade II	Not a paired site	8140/3: Adenocarcinoma, NOS	IIA	IIA	40	None/Unknown	No/Unknown	No radiation and/or cancer-directed surgery	85	19	0	56	Alive	46	White	Single (never married)	20	T3	N0	M0	Alive or dead due to cancer	Alive or dead of other cause	Yes	One primary only	Any Medicaid	Male
2011	209	Poorly differentiated; Grade III	Not a paired site	8480/3: Mucinous adenocarcinoma	IIA	IIA	30	Beam radiation	Yes	Radiation prior to surgery	999	11	0	59	Alive	55	White	Married (including common law)	10	T3	N0	M0	Alive or dead due to cancer	Alive or dead of other cause	Yes	One primary only	Insured	Male
2011	180	Poorly differentiated; Grade III	Not a paired site	8255/3: Adenocarcinoma with mixed subtypes	IIIC	IIIB	40	None/Unknown	No/Unknown	No radiation and/or cancer-directed surgery	38	18	4	49	Dead	51	White	Married (including common law)	20	T3	N2a	M0	Alive or dead due to cancer	Dead (attributable to this cancer dx)	Yes	One primary only	Insured	Male
2011	185	Moderately differentiated; Grade II	Not a paired site	8140/3: Adenocarcinoma, NOS	IV	IVB	40	None/Unknown	Yes	No radiation and/or cancer-directed surgery	90	20	5	19	Dead	64	White	Divorced	20	T4b	N2a	M1b	Alive or dead due to cancer	Dead (attributable to this cancer dx)	Yes	One primary only	Insured	Male
2011	184	Moderately differentiated; Grade II	Not a paired site	8140/3: Adenocarcinoma, NOS	I	I	40	None/Unknown	No/Unknown	No radiation and/or cancer-directed surgery	50	13	0	58	Alive	78	White	Married (including common law)	10	T2	N0	M0	Alive or dead due to cancer	Alive or dead of other cause	Yes	One primary only	Insured	Male
2011	187	Unknown	Not a paired site	8255/3: Adenocarcinoma with mixed subtypes	IIA	IIA	40	None/Unknown	Yes	No radiation and/or cancer-directed surgery	35	29	0	58	Alive	37	White	Married (including common law)	20	T3	N0	M0	Alive or dead due to cancer	Alive or dead of other cause	Yes	One primary only	Insured	Male
2011	184	Moderately differentiated; Grade II	Not a paired site	8140/3: Adenocarcinoma, NOS	I	I	40	None/Unknown	No/Unknown	No radiation and/or cancer-directed surgery	999	51	0	58	Alive	68	White	Married (including common law)	20	T1	N0	M0	N/A not first tumor	N/A not first tumor	Yes	2nd of 2 or more primaries	Insured/No specifics	Male
2011	182	Well differentiated; Grade I	Not a paired site	8140/3: Adenocarcinoma, NOS	IIIB	IIIB	30	None/Unknown	Yes	No radiation and/or cancer-directed surgery	67	30	4	55	Alive	69	White	Married (including common law)	20	T3	N1NOS	M0	Alive or dead due to cancer	Alive or dead of other cause	Yes	One primary only	Insured	Female
2011	180	Well differentiated; Grade I	Not a paired site	8140/3: Adenocarcinoma, NOS	IV	IVA	40	None/Unknown	Yes	No radiation and/or cancer-directed surgery	37	17	5	38	Dead	81	White	Married (including common law)	10	T4a	N2a	M1a	Alive or dead due to cancer	Dead (attributable to this cancer dx)	Yes	One primary only	Any Medicaid	Male
2011	182	Moderately differentiated; Grade II	Not a paired site	8140/3: Adenocarcinoma, NOS	I	I	40	None/Unknown	No/Unknown	No radiation and/or cancer-directed surgery	50	22	0	34	Dead	91	White	Widowed	10	T2	N0	M0	Dead (attributable to causes other than this cancer dx)	Alive or dead of other cause	Yes	One primary only	Insured/No specifics	Female
2011	189	Moderately differentiated; Grade II	Not a paired site	8480/3: Mucinous adenocarcinoma	IIB	IIB	40	None/Unknown	No/Unknown	No radiation and/or cancer-directed surgery	40	13	0	34	Dead	91	White	Widowed	20	T4a	N0	M0	Dead (attributable to causes other than this cancer dx)	Alive or dead of other cause	Yes	One primary only	Insured/No specifics	Male
2011	187	Moderately differentiated; Grade II	Not a paired site	8140/3: Adenocarcinoma, NOS	I	I	26	None/Unknown	No/Unknown	No radiation and/or cancer-directed surgery	50	0	98	49	Dead	84	White	Widowed	10	T1	N0	M0	Dead (attributable to causes other than this cancer dx)	Alive or dead of other cause	Yes	One primary only	Insured/No specifics	Female
2011	187	Moderately differentiated; Grade II	Not a paired site	8140/3: Adenocarcinoma, NOS	IIIB	IIIB	30	None/Unknown	No/Unknown	No radiation and/or cancer-directed surgery	80	26	3	26	Alive	59	White	Married (including common law)	20	T4a	N1b	M0	Alive or dead due to cancer	Alive or dead of other cause	Yes	One primary only	Any Medicaid	Female
2011	199	Moderately differentiated; Grade II	Not a paired site	8140/3: Adenocarcinoma, NOS	IIIB	IIIB	30	Beam radiation	Yes	Radiation prior to surgery	30	15	0	54	Alive	53	White	Divorced	10	T4a	N1NOS	M0	Alive or dead due to cancer	Alive or dead of other cause	Yes	One primary only	Insured	Female
2011	182	Poorly differentiated; Grade III	Not a paired site	8140/3: Adenocarcinoma, NOS	IIIC	IIIB	40	None/Unknown	Yes	No radiation and/or cancer-directed surgery	50	18	5	16	Dead	51	White	Married (including common law)	20	T3	N2a	M0	Alive or dead due to cancer	Dead (attributable to this cancer dx)	Yes	One primary only	Uninsured	Male
2011	182	Moderately differentiated; Grade II	Not a paired site	8140/3: Adenocarcinoma, NOS	I	I	40	None/Unknown	No/Unknown	No radiation and/or cancer-directed surgery	20	14	0	53	Alive	77	White	Married (including common law)	20	T1	N0	M0	Alive or dead due to cancer	Alive or dead of other cause	Yes	One primary only	Insured/No specifics	Female
2011	182	Poorly differentiated; Grade III	Not a paired site	8140/3: Adenocarcinoma, NOS	IV	IVA	32	None/Unknown	Yes	No radiation and/or cancer-directed surgery	130	37	0	51	Alive	40	Black	Single (never married)	20	T4a	N0	M1a	Alive or dead due to cancer	Alive or dead of other cause	Yes	One primary only	Insured	Female
2011	184	Moderately differentiated; Grade II	Not a paired site	8140/3: Adenocarcinoma, NOS	I	I	27	None/Unknown	No/Unknown	No radiation and/or cancer-directed surgery	80	0	98	10	Dead	97	White	Widowed	20	T1	N0	M0	Alive or dead due to cancer	Dead (attributable to this cancer dx)	Yes	One primary only	Insured	Female
2011	187	Moderately differentiated; Grade II	Not a paired site	8140/3: Adenocarcinoma, NOS	IIIA	IIIA	30	None/Unknown	Yes	No radiation and/or cancer-directed surgery	30	16	1	54	Alive	66	White	Widowed	20	T2	N1a	M0	Alive or dead due to cancer	Alive or dead of other cause	Yes	One primary only	Insured/No specifics	Female
2011	182	Poorly differentiated; Grade III	Not a paired site	8140/3: Adenocarcinoma, NOS	IV	IVA	40	None/Unknown	Yes	No radiation and/or cancer-directed surgery	110	52	15	17	Dead	83	White	Widowed	20	T3	N2b	M1a	Dead (missing/unknown COD)	Dead (missing/unknown COD)	Yes	One primary only	Any Medicaid	Female
2011	186	Moderately differentiated; Grade II	Not a paired site	8140/3: Adenocarcinoma, NOS	IIA	IIA	30	None/Unknown	No/Unknown	No radiation and/or cancer-directed surgery	40	40	0	51	Alive	45	White	Divorced	20	T3	N0	M0	Alive or dead due to cancer	Alive or dead of other cause	Yes	One primary only	Insured	Female
2011	180	Moderately differentiated; Grade II	Not a paired site	8140/3: Adenocarcinoma, NOS	IIIC	IIIC	40	None/Unknown	Yes	No radiation and/or cancer-directed surgery	55	21	8	21	Dead	53	White	Married (including common law)	10	T4a	N2b	M0	Alive or dead due to cancer	Dead (attributable to this cancer dx)	Yes	One primary only	Insured	Female
2011	180	Moderately differentiated; Grade II	Not a paired site	8480/3: Mucinous adenocarcinoma	IIIB	IIIC	40	None/Unknown	Yes	No radiation and/or cancer-directed surgery	150	22	1	49	Dead	69	White	Married (including common law)	10	T4b	N1a	M0	Alive or dead due to cancer	Dead (attributable to this cancer dx)	Yes	One primary only	Insured/No specifics	Female
2011	199	Moderately differentiated; Grade II	Not a paired site	8263/3: Adenocarcinoma in tubulovillous adenoma	0	0	26	None/Unknown	No/Unknown	No radiation and/or cancer-directed surgery	999	0	98	52	Alive	64	White	Married (including common law)	10	Tis	N0	M0	Alive or dead due to cancer	Alive or dead of other cause	Yes	One primary only	Insured	Female
2011	209	Well differentiated; Grade I	Not a paired site	8140/3: Adenocarcinoma, NOS	IV	IVB	0	None/Unknown	Yes	No radiation and/or cancer-directed surgery	999	0	98	38	Dead	78	White	Married (including common law)	10	TX	N0	M1b	Alive or dead due to cancer	Dead (attributable to this cancer dx)	Yes	One primary only	Insured/No specifics	Male
2011	209	Moderately differentiated; Grade II	Not a paired site	8140/3: Adenocarcinoma, NOS	IIB	IIC	0	Beam radiation	Yes	No radiation and/or cancer-directed surgery	50	0	98	14	Dead	86	White	Married (including common law)	10	T4b	N0	M0	Alive or dead due to cancer	Dead (attributable to this cancer dx)	Yes	One primary only	Insured	Male
2011	187	Moderately differentiated; Grade II	Not a paired site	8140/3: Adenocarcinoma, NOS	I	I	40	None/Unknown	No/Unknown	No radiation and/or cancer-directed surgery	18	14	0	54	Alive	83	White	Married (including common law)	20	T2	N0	M0	Alive or dead due to cancer	Alive or dead of other cause	Yes	One primary only	Insured	Female
2011	182	Unknown	Not a paired site	8263/3: Adenocarcinoma in tubulovillous adenoma	IV	IVA	0	None/Unknown	Yes	No radiation and/or cancer-directed surgery	999	0	98	11	Dead	87	Black	Widowed	10	T1	N0	M1a	Dead (attributable to causes other than this cancer dx)	Alive or dead of other cause	Yes	One primary only	Insured	Female
2011	182	Poorly differentiated; Grade III	Not a paired site	8480/3: Mucinous adenocarcinoma	IIIC	IIIC	30	None/Unknown	Yes	No radiation and/or cancer-directed surgery	37	29	4	40	Dead	87	White	Married (including common law)	20	T4a	N2a	M0	Alive or dead due to cancer	Dead (attributable to this cancer dx)	Yes	One primary only	Insured	Female
2011	209	Moderately differentiated; Grade II	Not a paired site	8140/3: Adenocarcinoma, NOS	I	I	30	None/Unknown	No/Unknown	No radiation and/or cancer-directed surgery	36	9	0	54	Alive	48	White	Married (including common law)	20	T2	N0	M0	Alive or dead due to cancer	Alive or dead of other cause	Yes	One primary only	Insured	Female
2011	186	Poorly differentiated; Grade III	Not a paired site	8140/3: Adenocarcinoma, NOS	IIIC	IIIC	40	None/Unknown	No/Unknown	No radiation and/or cancer-directed surgery	45	20	16	9	Dead	57	White	Single (never married)	20	T4b	N2b	M0	Alive or dead due to cancer	Dead (attributable to this cancer dx)	Yes	One primary only	Insured	Male
2011	180	Moderately differentiated; Grade II	Not a paired site	8140/3: Adenocarcinoma, NOS	IIIB	IIIB	40	None/Unknown	Yes	No radiation and/or cancer-directed surgery	70	13	2	48	Alive	68	White	Married (including common law)	20	T4a	N1b	M0	Alive or dead due to cancer	Alive or dead of other cause	Yes	One primary only	Insured/No specifics	Female
2011	187	Moderately differentiated; Grade II	Not a paired site	8210/3: Adenocarcinoma in adenomatous polyp	I	I	30	None/Unknown	No/Unknown	No radiation and/or cancer-directed surgery	999	7	0	48	Alive	58	White	Single (never married)	20	T1	N0	M0	Alive or dead due to cancer	Alive or dead of other cause	Yes	One primary only	Any Medicaid	Female
2011	209	Moderately differentiated; Grade II	Not a paired site	8140/3: Adenocarcinoma, NOS	IIA	IIA	50	Beam radiation	Yes	Radiation prior to surgery	45	9	0	48	Alive	85	White	Single (never married)	10	T3	N0	M0	Alive or dead due to cancer	Alive or dead of other cause	Yes	One primary only	Insured	Male
2011	209	Moderately differentiated; Grade II	Not a paired site	8140/3: Adenocarcinoma, NOS	IV	IVB	0	Beam radiation	Yes	No radiation and/or cancer-directed surgery	40	0	98	35	Dead	46	White	Married (including common law)	10	T1	N0	M1b	Alive or dead due to cancer	Dead (attributable to this cancer dx)	Yes	One primary only	Any Medicaid	Male
2011	180	Moderately differentiated; Grade II	Not a paired site	8140/3: Adenocarcinoma, NOS	IV	IVA	40	None/Unknown	Yes	No radiation and/or cancer-directed surgery	55	21	0	52	Alive	62	White	Divorced	10	T3	N1c	M1a	Alive or dead due to cancer	Alive or dead of other cause	Yes	One primary only	Any Medicaid	Male
2011	199	Undifferentiated; anaplastic; Grade IV	Not a paired site	8255/3: Adenocarcinoma with mixed subtypes	IIIC	IIIC	30	None/Unknown	Yes	No radiation and/or cancer-directed surgery	999	53	45	11	Dead	54	American Indian/Alaska Native	Married (including common law)	20	T4a	N2b	M0	Alive or dead due to cancer	Dead (attributable to this cancer dx)	Yes	One primary only	Any Medicaid	Male
2011	183	Poorly differentiated; Grade III	Not a paired site	8010/3: Carcinoma, NOS	IV	IVB	0	None/Unknown	Yes	No radiation and/or cancer-directed surgery	67	0	98	4	Dead	66	White	Married (including common law)	20	TX	N1NOS	M1b	Alive or dead due to cancer	Dead (attributable to this cancer dx)	Yes	One primary only	Insured/No specifics	Male
2011	209	Poorly differentiated; Grade III	Not a paired site	8480/3: Mucinous adenocarcinoma	IV	IVB	30	None/Unknown	No/Unknown	No radiation and/or cancer-directed surgery	27	6	4	10	Dead	53	White	Married (including common law)	20	T3	N2a	M1b	Alive or dead due to cancer	Dead (attributable to this cancer dx)	Yes	One primary only	Insured	Male
2011	186	Well differentiated; Grade I	Not a paired site	8480/3: Mucinous adenocarcinoma	IV	IVA	40	None/Unknown	Yes	No radiation and/or cancer-directed surgery	65	36	1	34	Dead	61	White	Single (never married)	10	T3	N1a	M1a	Alive or dead due to cancer	Dead (attributable to this cancer dx)	Yes	One primary only	Any Medicaid	Male
2011	187	Moderately differentiated; Grade II	Not a paired site	8263/3: Adenocarcinoma in tubulovillous adenoma	IV	IVB	0	None/Unknown	Yes	No radiation and/or cancer-directed surgery	370	0	98	18	Dead	52	White	Married (including common law)	10	T1	N1NOS	M1b	Alive or dead due to cancer	Dead (attributable to this cancer dx)	Yes	One primary only	Insured	Female
2011	180	Poorly differentiated; Grade III	Not a paired site	8140/3: Adenocarcinoma, NOS	IV	IVB	0	None/Unknown	Yes	No radiation and/or cancer-directed surgery	999	0	98	26	Dead	47	White	Married (including common law)	20	T1	N1NOS	M1b	Alive or dead due to cancer	Dead (attributable to this cancer dx)	Yes	1st of 2 or more primaries	Insured	Female
2011	209	Poorly differentiated; Grade III	Not a paired site	8140/3: Adenocarcinoma, NOS	IV	IVB	0	None/Unknown	Yes	No radiation and/or cancer-directed surgery	999	0	98	26	Dead	47	White	Married (including common law)	20	T1	N0	M1b	N/A not first tumor	N/A not first tumor	Yes	2nd of 2 or more primaries	Insured	Female
2012	182	Moderately differentiated; Grade II	Not a paired site	8140/3: Adenocarcinoma, NOS	IV	IVA	40	None/Unknown	Yes	No radiation and/or cancer-directed surgery	999	98	97	39	Alive	69	Black	Widowed	10	T3	N1NOS	M1a	N/A not first tumor	N/A not first tumor	Yes	2nd of 2 or more primaries	Insured/No specifics	Female
2011	209	Moderately differentiated; Grade II	Not a paired site	8140/3: Adenocarcinoma, NOS	IV	IVB	0	None/Unknown	Yes	No radiation and/or cancer-directed surgery	21	0	98	35	Dead	47	White	Single (never married)	20	T3	N1NOS	M1b	Alive or dead due to cancer	Dead (attributable to this cancer dx)	Yes	One primary only	Any Medicaid	Female
2011	187	Well differentiated; Grade I	Not a paired site	8480/3: Mucinous adenocarcinoma	IIB	IIC	40	Beam radiation	Yes	Radiation prior to surgery	90	14	0	37	Dead	66	Black	Married (including common law)	10	T4b	N0	M0	N/A not first tumor	N/A not first tumor	Yes	2nd of 2 or more primaries	Insured	Female
2011	199	Moderately differentiated; Grade II	Not a paired site	8140/3: Adenocarcinoma, NOS	IIB	IIC	0	None/Unknown	Yes	No radiation and/or cancer-directed surgery	97	0	98	37	Dead	66	Black	Married (including common law)	20	T4b	N0	M0	N/A not first tumor	N/A not first tumor	Yes	3rd of 3 or more primaries	Insured	Female
2012	187	Moderately differentiated; Grade II	Not a paired site	8140/3: Adenocarcinoma, NOS	IV	IVNOS	0	None/Unknown	Yes	No radiation and/or cancer-directed surgery	999	0	98	8	Dead	73	White	Married (including common law)	10	T1	N0	M1NOS	N/A not first tumor	N/A not first tumor	Yes	2nd of 2 or more primaries	Insured/No specifics	Female
2011	182	Moderately differentiated; Grade II	Not a paired site	8140/3: Adenocarcinoma, NOS	IV	IVA	0	None/Unknown	Yes	No radiation and/or cancer-directed surgery	999	0	98	19	Dead	75	White	Married (including common law)	20	T1	N1NOS	M1a	Dead (attributable to causes other than this cancer dx)	Alive or dead of other cause	Yes	One primary only	Any Medicaid	Female
2011	180	Poorly differentiated; Grade III	Not a paired site	8140/3: Adenocarcinoma, NOS	IV	IVA	40	None/Unknown	No/Unknown	No radiation and/or cancer-directed surgery	45	12	3	16	Dead	84	White	Single (never married)	10	T4b	N1b	M1a	Alive or dead due to cancer	Dead (attributable to this cancer dx)	Yes	One primary only	Insured/No specifics	Male
2011	180	Well differentiated; Grade I	Not a paired site	8481/3: Mucin-producing adenocarcinoma	IV	IVA	40	None/Unknown	Yes	No radiation and/or cancer-directed surgery	60	17	4	38	Dead	69	Black	Single (never married)	10	T3	N2a	M1a	Alive or dead due to cancer	Dead (attributable to this cancer dx)	Yes	One primary only	Insured/No specifics	Male
2011	180	Poorly differentiated; Grade III	Not a paired site	8480/3: Mucinous adenocarcinoma	IIB	IIB	40	Beam radiation	Yes	Radiation after surgery	50	22	0	51	Alive	54	White	Married (including common law)	10	T4a	N0	M0	Alive or dead due to cancer	Alive or dead of other cause	Yes	One primary only	Insured/No specifics	Male
2011	180	Moderately differentiated; Grade II	Not a paired site	8480/3: Mucinous adenocarcinoma	IV	IVA	30	None/Unknown	Yes	No radiation and/or cancer-directed surgery	55	27	7	50	Alive	55	White	Married (including common law)	10	T3	N2b	M1a	Alive or dead due to cancer	Alive or dead of other cause	Yes	One primary only	Insured	Female
2011	209	Moderately differentiated; Grade II	Not a paired site	8210/3: Adenocarcinoma in adenomatous polyp	IV	IVB	0	None/Unknown	Yes	No radiation and/or cancer-directed surgery	60	0	98	22	Dead	53	White	Married (including common law)	10	T3	N1c	M1b	Alive or dead due to cancer	Dead (attributable to this cancer dx)	Yes	One primary only	Insured	Male
2011	184	Moderately differentiated; Grade II	Not a paired site	8480/3: Mucinous adenocarcinoma	IIIC	IIIC	40	None/Unknown	Yes	No radiation and/or cancer-directed surgery	70	62	4	15	Dead	42	Black	Single (never married)	10	T4b	N2a	M0	Alive or dead due to cancer	Dead (attributable to this cancer dx)	Yes	One primary only	Any Medicaid	Female
2011	209	Poorly differentiated; Grade III	Not a paired site	8140/3: Adenocarcinoma, NOS	IIIC	IIIA	30	Beam radiation	Yes	Radiation after surgery	23	25	4	49	Alive	61	White	Married (including common law)	20	T1	N2a	M0	Alive or dead due to cancer	Alive or dead of other cause	Yes	One primary only	Insurance status unknown	Female
2011	199	Moderately differentiated; Grade II	Not a paired site	8140/3: Adenocarcinoma, NOS	IV	IVB	0	Beam radiation	Yes	No radiation and/or cancer-directed surgery	999	99	99	14	Dead	37	White	Single (never married)	10	TX	NX	M1b	Alive or dead due to cancer	Dead (attributable to this cancer dx)	Yes	One primary only	Any Medicaid	Female
2011	182	Poorly differentiated; Grade III	Not a paired site	8140/3: Adenocarcinoma, NOS	IV	IVB	40	Refused	Yes	No radiation and/or cancer-directed surgery	60	15	2	53	Alive	71	White	Married (including common law)	10	T4b	N1b	M1b	Alive or dead due to cancer	Alive or dead of other cause	Yes	One primary only	Insured	Male
2011	199	Moderately differentiated; Grade II	Not a paired site	8480/3: Mucinous adenocarcinoma	IIIB	IIIB	30	None/Unknown	No/Unknown	No radiation and/or cancer-directed surgery	110	29	1	49	Alive	64	White	Divorced	20	T3	N1a	M0	Alive or dead due to cancer	Alive or dead of other cause	Yes	One primary only	Insured	Male
2012	182	Moderately differentiated; Grade II	Not a paired site	8140/3: Adenocarcinoma, NOS	I	I	40	None/Unknown	No/Unknown	No radiation and/or cancer-directed surgery	37	27	0	41	Alive	59	White	Married (including common law)	20	T2	N0	M0	N/A not first tumor	N/A not first tumor	Yes	2nd of 2 or more primaries	Insured/No specifics	Female
2011	180	Poorly differentiated; Grade III	Not a paired site	8140/3: Adenocarcinoma, NOS	IV	IVB	0	None/Unknown	Yes	No radiation and/or cancer-directed surgery	111	0	98	6	Dead	62	Black	Divorced	20	T4b	N0	M1b	Alive or dead due to cancer	Dead (attributable to this cancer dx)	Yes	One primary only	Insured/No specifics	Female
2011	180	Moderately differentiated; Grade II	Not a paired site	8140/3: Adenocarcinoma, NOS	IV	IVA	40	None/Unknown	Yes	No radiation and/or cancer-directed surgery	55	36	10	30	Dead	45	White	Married (including common law)	10	T3	N2b	M1a	Alive or dead due to cancer	Dead (attributable to this cancer dx)	Yes	One primary only	Insured	Male
2011	199	Unknown	Not a paired site	8490/3: Signet ring cell carcinoma	IV	IVB	0	None/Unknown	Yes	No radiation and/or cancer-directed surgery	999	0	98	17	Dead	68	White	Single (never married)	20	T4a	NX	M1b	Alive or dead due to cancer	Dead (attributable to this cancer dx)	Yes	One primary only	Insured	Female
2011	209	Moderately differentiated; Grade II	Not a paired site	8263/3: Adenocarcinoma in tubulovillous adenoma	IIIA	IIIA	30	Beam radiation	Yes	Radiation after surgery	999	40	1	50	Alive	37	White	Married (including common law)	20	T2	N1a	M0	Alive or dead due to cancer	Alive or dead of other cause	Yes	One primary only	Any Medicaid	Male
2010	180	Undifferentiated; anaplastic; Grade IV	Not a paired site	8480/3: Mucinous adenocarcinoma	IIIC	IIIC	40	None/Unknown	No/Unknown	No radiation and/or cancer-directed surgery	70	20	7	13	Alive	61	White	Married (including common law)	20	T4a	N2b	M0	Alive or dead due to cancer	Alive or dead of other cause	Yes	One primary only	Insured/No specifics	Male
2011	186	Moderately differentiated; Grade II	Not a paired site	8140/3: Adenocarcinoma, NOS	IIIB	IIIB	40	None/Unknown	Yes	No radiation and/or cancer-directed surgery	18	15	1	53	Alive	50	White	Widowed	20	T4a	N1a	M0	Alive or dead due to cancer	Alive or dead of other cause	Yes	One primary only	Any Medicaid	Female
2010	183	Moderately differentiated; Grade II	Not a paired site	8140/3: Adenocarcinoma, NOS	IIA	IIA	40	None/Unknown	No/Unknown	No radiation and/or cancer-directed surgery	90	28	0	65	Alive	61	White	Married (including common law)	20	T3	N0	M0	Alive or dead due to cancer	Alive or dead of other cause	Yes	One primary only	Insured/No specifics	Male
2011	187	Moderately differentiated; Grade II	Not a paired site	8140/3: Adenocarcinoma, NOS	IV	IVA	0	None/Unknown	Yes	No radiation and/or cancer-directed surgery	50	0	98	49	Dead	50	White	Married (including common law)	20	TX	N1a	M1a	Alive or dead due to cancer	Dead (attributable to this cancer dx)	Yes	One primary only	Insured	Female
2011	199	Poorly differentiated; Grade III	Not a paired site	8140/3: Adenocarcinoma, NOS	IIIB	IIIB	50	Beam radiation	Yes	Radiation after surgery	30	33	2	49	Alive	53	White	Married (including common law)	20	T3	N1b	M0	Alive or dead due to cancer	Alive or dead of other cause	Yes	One primary only	Insured	Female
2011	180	Well differentiated; Grade I	Not a paired site	8263/3: Adenocarcinoma in tubulovillous adenoma	IV	IVB	40	None/Unknown	Yes	No radiation and/or cancer-directed surgery	40	22	5	15	Dead	68	White	Married (including common law)	20	T4a	N2a	M1b	Alive or dead due to cancer	Dead (attributable to this cancer dx)	Yes	1st of 2 or more primaries	Insured	Male
2011	182	Unknown	Not a paired site	8140/3: Adenocarcinoma, NOS	IV	IVA	0	None/Unknown	No/Unknown	No radiation and/or cancer-directed surgery	29	0	98	6	Dead	69	White	Married (including common law)	20	T1	N0	M1a	Dead (missing/unknown COD)	Dead (missing/unknown COD)	Yes	One primary only	Uninsured	Female
2011	187	Well differentiated; Grade I	Not a paired site	8480/3: Mucinous adenocarcinoma	IIB	IIB	50	None/Unknown	No/Unknown	No radiation and/or cancer-directed surgery	60	16	0	50	Alive	60	White	Married (including common law)	20	T4a	N0	M0	Alive or dead due to cancer	Alive or dead of other cause	Yes	One primary only	Any Medicaid	Female
2011	209	Moderately differentiated; Grade II	Not a paired site	8140/3: Adenocarcinoma, NOS	IV	IVA	0	None/Unknown	Yes	No radiation and/or cancer-directed surgery	999	0	98	26	Dead	55	White	Married (including common law)	10	TX	N0	M1a	Alive or dead due to cancer	Dead (attributable to this cancer dx)	Yes	One primary only	Insured	Female
2011	209	Unknown	Not a paired site	8480/3: Mucinous adenocarcinoma	IV	IVA	30	None/Unknown	Yes	No radiation and/or cancer-directed surgery	63	0	98	49	Alive	48	White	Married (including common law)	10	T3	N0	M1a	Alive or dead due to cancer	Alive or dead of other cause	Yes	One primary only	Insured	Male
2011	180	Poorly differentiated; Grade III	Not a paired site	8140/3: Adenocarcinoma, NOS	IIIC	IIIC	50	None/Unknown	Yes	No radiation and/or cancer-directed surgery	28	90	17	57	Dead	78	White	Widowed	10	T4a	N2b	M0	Alive or dead due to cancer	Dead (attributable to this cancer dx)	Yes	1st of 2 or more primaries	Insured	Female
2011	187	Poorly differentiated; Grade III	Not a paired site	8140/3: Adenocarcinoma, NOS	IIIC	IIIC	50	None/Unknown	Yes	No radiation and/or cancer-directed surgery	22	90	17	56	Dead	78	White	Widowed	10	T4a	N2b	M0	N/A not first tumor	N/A not first tumor	No	2nd of 2 or more primaries	Insured	Female
2011	209	Well differentiated; Grade I	Not a paired site	8140/3: Adenocarcinoma, NOS	IV	IVA	0	None/Unknown	Yes	No radiation and/or cancer-directed surgery	999	0	98	28	Dead	43	White	Married (including common law)	20	T1	N1NOS	M1a	Alive or dead due to cancer	Dead (attributable to this cancer dx)	Yes	One primary only	Insured	Female
2011	180	Poorly differentiated; Grade III	Not a paired site	8140/3: Adenocarcinoma, NOS	IV	IVA	40	None/Unknown	No/Unknown	No radiation and/or cancer-directed surgery	50	24	6	9	Dead	85	White	Married (including common law)	10	T4b	N2a	M1a	Alive or dead due to cancer	Dead (attributable to this cancer dx)	Yes	One primary only	Insured	Female
2011	182	Poorly differentiated; Grade III	Not a paired site	8140/3: Adenocarcinoma, NOS	IIIB	IIIB	40	None/Unknown	No/Unknown	No radiation and/or cancer-directed surgery	60	22	2	4	Alive	65	White	Divorced	20	T4a	N1b	M0	Alive or dead due to cancer	Alive or dead of other cause	Yes	One primary only	Insured	Female
2011	184	Moderately differentiated; Grade II	Right - origin of primary	8140/3: Adenocarcinoma, NOS	IV	IVA	30	None/Unknown	No/Unknown	No radiation and/or cancer-directed surgery	25	1	0	33	Dead	50	Black	Married (including common law)	10	T3	N1c	M1a	Alive or dead due to cancer	Dead (attributable to this cancer dx)	Yes	One primary only	Insured	Male
2011	209	Moderately differentiated; Grade II	Not a paired site	8140/3: Adenocarcinoma, NOS	IIIB	IIIB	50	None/Unknown	No/Unknown	No radiation and/or cancer-directed surgery	70	20	3	44	Alive	70	White	Married (including common law)	10	T3	N1b	M0	Alive or dead due to cancer	Alive or dead of other cause	Yes	One primary only	Insured	Female
2012	209	Unknown	Not a paired site	8263/3: Adenocarcinoma in tubulovillous adenoma	I	I	30	None/Unknown	No/Unknown	No radiation and/or cancer-directed surgery	40	0	98	27	Dead	70	White	Married (including common law)	20	T1	N0	M0	N/A not first tumor	N/A not first tumor	Yes	2nd of 2 or more primaries	Insured/No specifics	Male
2012	185	Moderately differentiated; Grade II	Not a paired site	8140/3: Adenocarcinoma, NOS	I	I	40	None/Unknown	No/Unknown	No radiation and/or cancer-directed surgery	30	22	0	22	Dead	70	White	Married (including common law)	10	T2	N0	M0	N/A not first tumor	N/A not first tumor	Yes	3rd of 3 or more primaries	Insured	Male
2011	187	Moderately differentiated; Grade II	Not a paired site	8263/3: Adenocarcinoma in tubulovillous adenoma	I	I	30	None/Unknown	No/Unknown	No radiation and/or cancer-directed surgery	10	41	0	48	Alive	42	Unknown	Single (never married)	10	T1	N0	M0	Alive or dead due to cancer	Alive or dead of other cause	Yes	One primary only	Insured	Male
2011	187	Poorly differentiated; Grade III	Not a paired site	8140/3: Adenocarcinoma, NOS	IV	IVNOS	80	None/Unknown	Yes	No radiation and/or cancer-directed surgery	32	20	10	13	Dead	41	White	Married (including common law)	20	T4a	N2b	M1NOS	Alive or dead due to cancer	Dead (attributable to this cancer dx)	Yes	One primary only	Insured	Female
2011	199	Unknown	Not a paired site	8140/3: Adenocarcinoma, NOS	IV	IVB	0	None/Unknown	Yes	No radiation and/or cancer-directed surgery	999	0	98	34	Dead	57	White	Married (including common law)	20	T3	N0	M1b	Alive or dead due to cancer	Dead (attributable to this cancer dx)	Yes	One primary only	Insured/No specifics	Male
2011	209	Moderately differentiated; Grade II	Not a paired site	8140/3: Adenocarcinoma, NOS	IV	IVA	30	Beam radiation	Yes	Radiation prior to surgery	35	3	0	15	Dead	47	White	Single (never married)	20	T3	N0	M1a	Alive or dead due to cancer	Dead (attributable to this cancer dx)	Yes	One primary only	Any Medicaid	Female
2011	182	Poorly differentiated; Grade III	Not a paired site	8140/3: Adenocarcinoma, NOS	IV	IVA	30	None/Unknown	Yes	No radiation and/or cancer-directed surgery	35	13	0	28	Dead	59	White	Married (including common law)	10	T3	N0	M1a	Alive or dead due to cancer	Dead (attributable to this cancer dx)	Yes	1st of 2 or more primaries	Insured	Male
2011	209	Unknown	Not a paired site	8140/3: Adenocarcinoma, NOS	IV	IVB	0	None/Unknown	Yes	No radiation and/or cancer-directed surgery	80	0	98	11	Dead	42	White	Unknown	20	TX	N2a	M1b	Alive or dead due to cancer	Dead (attributable to this cancer dx)	Yes	One primary only	Insured/No specifics	Male
2011	180	Moderately differentiated; Grade II	Not a paired site	8140/3: Adenocarcinoma, NOS	IV	IVA	30	None/Unknown	Yes	No radiation and/or cancer-directed surgery	75	16	4	4	Dead	64	Black	Divorced	20	T3	N2a	M1a	Alive or dead due to cancer	Dead (attributable to this cancer dx)	Yes	One primary only	Any Medicaid	Female
2011	209	Moderately differentiated; Grade II	Not a paired site	8140/3: Adenocarcinoma, NOS	IV	IVB	0	None/Unknown	Yes	No radiation and/or cancer-directed surgery	30	0	98	26	Dead	47	White	Married (including common law)	10	T3	N1b	M1b	Alive or dead due to cancer	Dead (attributable to this cancer dx)	Yes	One primary only	Insured	Female
2012	187	Unknown	Not a paired site	8140/3: Adenocarcinoma, NOS	IV	IVB	30	None/Unknown	Yes	No radiation and/or cancer-directed surgery	999	0	98	20	Dead	59	White	Married (including common law)	20	T4b	N0	M1b	Alive or dead due to cancer	Dead (attributable to this cancer dx)	Yes	One primary only	Uninsured	Female
2011	199	Moderately differentiated; Grade II	Not a paired site	8140/3: Adenocarcinoma, NOS	IIIC	IIIC	30	Beam radiation	No/Unknown	Radiation after surgery	15	17	12	26	Dead	40	Black	Married (including common law)	20	T3	N2b	M0	Alive or dead due to cancer	Dead (attributable to this cancer dx)	Yes	One primary only	Insured	Male
2011	209	Moderately differentiated; Grade II	Not a paired site	8140/3: Adenocarcinoma, NOS	IV	IVB	0	None/Unknown	Yes	No radiation and/or cancer-directed surgery	999	0	98	6	Dead	68	White	Single (never married)	20	TX	N1NOS	M1b	N/A not first tumor	N/A not first tumor	Yes	2nd of 2 or more primaries	Insured	Female
2011	187	Poorly differentiated; Grade III	Not a paired site	8140/3: Adenocarcinoma, NOS	IV	IVB	0	None/Unknown	Yes	No radiation and/or cancer-directed surgery	100	0	98	10	Dead	72	Asian or Pacific Islander	Married (including common law)	10	T4b	NX	M1b	Alive or dead due to cancer	Dead (attributable to this cancer dx)	Yes	One primary only	Insured/No specifics	Female
2011	189	Unknown	Not a paired site	8140/3: Adenocarcinoma, NOS	IV	IVB	0	None/Unknown	Yes	No radiation and/or cancer-directed surgery	999	0	98	29	Dead	61	White	Unknown	10	TX	NX	M1b	Alive or dead due to cancer	Dead (attributable to this cancer dx)	Yes	One primary only	Insured	Female
2011	184	Poorly differentiated; Grade III	Not a paired site	8140/3: Adenocarcinoma, NOS	IV	IVA	50	None/Unknown	Yes	No radiation and/or cancer-directed surgery	75	32	2	52	Alive	53	White	Married (including common law)	10	T4a	N1b	M1a	Alive or dead due to cancer	Alive or dead of other cause	Yes	1st of 2 or more primaries	Insured	Male
2012	184	Poorly differentiated; Grade III	Not a paired site	8490/3: Signet ring cell carcinoma	IV	IVA	40	None/Unknown	Yes	No radiation and/or cancer-directed surgery	20	11	5	24	Dead	72	White	Widowed	20	T3	N2a	M1a	Alive or dead due to cancer	Dead (attributable to this cancer dx)	Yes	1st of 2 or more primaries	Insured	Female
2012	187	Well differentiated; Grade I	Not a paired site	8140/3: Adenocarcinoma, NOS	IV	IVA	40	None/Unknown	Yes	No radiation and/or cancer-directed surgery	35	10	4	43	Dead	60	White	Married (including common law)	20	T3	N2a	M1a	Dead (attributable to causes other than this cancer dx)	Alive or dead of other cause	Yes	One primary only	Any Medicaid	Male
2012	187	Moderately differentiated; Grade II	Not a paired site	8140/3: Adenocarcinoma, NOS	IV	IVB	0	None/Unknown	Yes	No radiation and/or cancer-directed surgery	999	0	98	30	Dead	76	White	Widowed	10	TX	NX	M1b	Alive or dead due to cancer	Dead (attributable to this cancer dx)	Yes	One primary only	Insured	Female
2012	184	Moderately differentiated; Grade II	Not a paired site	8140/3: Adenocarcinoma, NOS	IV	IVB	0	None/Unknown	Yes	No radiation and/or cancer-directed surgery	999	0	98	24	Dead	47	Black	Single (never married)	20	T3	N2NOS	M1b	Alive or dead due to cancer	Dead (attributable to this cancer dx)	Yes	One primary only	Insured	Male
2012	180	Moderately differentiated; Grade II	Not a paired site	8140/3: Adenocarcinoma, NOS	IV	IVB	32	None/Unknown	Yes	No radiation and/or cancer-directed surgery	40	11	4	40	Dead	45	White	Divorced	20	T3	N2a	M1b	Dead (attributable to causes other than this cancer dx)	Alive or dead of other cause	Yes	One primary only	Any Medicaid	Male
2012	180	Moderately differentiated; Grade II	Not a paired site	8140/3: Adenocarcinoma, NOS	IIA	IIA	30	None/Unknown	Yes	No radiation and/or cancer-directed surgery	107	36	0	47	Alive	50	Black	Single (never married)	20	T3	N0	M0	Alive or dead due to cancer	Alive or dead of other cause	Yes	One primary only	Any Medicaid	Female
2012	182	Moderately differentiated; Grade II	Not a paired site	8140/3: Adenocarcinoma, NOS	IIIA	IIIA	40	None/Unknown	Yes	No radiation and/or cancer-directed surgery	24	25	2	46	Alive	75	White	Married (including common law)	20	T2	N1b	M0	Alive or dead due to cancer	Alive or dead of other cause	Yes	One primary only	Insured	Male
2012	186	Moderately differentiated; Grade II	Not a paired site	8140/3: Adenocarcinoma, NOS	IV	IVNOS	30	None/Unknown	Yes	No radiation and/or cancer-directed surgery	75	26	0	44	Alive	80	White	Married (including common law)	10	T4b	N0	M1NOS	Alive or dead due to cancer	Alive or dead of other cause	Yes	One primary only	Insured	Female
2012	187	Moderately differentiated; Grade II	Not a paired site	8210/3: Adenocarcinoma in adenomatous polyp	IIIC	IIIC	40	None/Unknown	Yes	No radiation and/or cancer-directed surgery	115	59	4	44	Alive	47	White	Married (including common law)	20	T4b	N2a	M0	Alive or dead due to cancer	Alive or dead of other cause	Yes	One primary only	Insured/No specifics	Male
2012	180	Moderately differentiated; Grade II	Not a paired site	8490/3: Signet ring cell carcinoma	IIIC	IIIB	30	None/Unknown	Yes	No radiation and/or cancer-directed surgery	55	12	7	44	Alive	65	Black	Married (including common law)	10	T2	N2b	M0	Alive or dead due to cancer	Alive or dead of other cause	Yes	One primary only	Insured	Male
2012	180	Moderately differentiated; Grade II	Not a paired site	8140/3: Adenocarcinoma, NOS	IIA	IIA	30	None/Unknown	Yes	No radiation and/or cancer-directed surgery	72	23	0	27	Alive	52	Asian or Pacific Islander	Widowed	20	T3	N0	M0	Alive or dead due to cancer	Alive or dead of other cause	Yes	One primary only	Insured/No specifics	Male
2012	182	Poorly differentiated; Grade III	Not a paired site	8140/3: Adenocarcinoma, NOS	IIA	IIA	30	None/Unknown	No/Unknown	No radiation and/or cancer-directed surgery	45	16	0	47	Alive	65	White	Married (including common law)	20	T3	N0	M0	Alive or dead due to cancer	Alive or dead of other cause	Yes	One primary only	Insured	Male
2012	209	Unknown	Not a paired site	8140/3: Adenocarcinoma, NOS	I	I	50	Beam radiation	Yes	Radiation prior to surgery	30	12	0	25	Alive	66	White	Divorced	10	T2	N0	M0	Alive or dead due to cancer	Alive or dead of other cause	Yes	One primary only	Insured/No specifics	Male
2012	209	Moderately differentiated; Grade II	Not a paired site	8140/3: Adenocarcinoma, NOS	IIIB	IIIC	50	Beam radiation	Yes	Radiation prior to surgery	80	17	2	43	Alive	65	White	Divorced	20	T4b	N1b	M0	Alive or dead due to cancer	Alive or dead of other cause	Yes	One primary only	Insured/No specifics	Female
2012	180	Undifferentiated; anaplastic; Grade IV	Not a paired site	8210/3: Adenocarcinoma in adenomatous polyp	IV	IVB	30	None/Unknown	Yes	No radiation and/or cancer-directed surgery	35	13	5	7	Dead	86	White	Married (including common law)	10	T4b	N2a	M1b	N/A not first tumor	N/A not first tumor	Yes	2nd of 2 or more primaries	Insured	Male
2012	185	Moderately differentiated; Grade II	Not a paired site	8140/3: Adenocarcinoma, NOS	I	I	30	None/Unknown	No/Unknown	No radiation and/or cancer-directed surgery	30	14	0	46	Alive	75	White	Widowed	20	T2	N0	M0	Alive or dead due to cancer	Alive or dead of other cause	Yes	One primary only	Insured	Female
2012	209	Moderately differentiated; Grade II	Not a paired site	8140/3: Adenocarcinoma, NOS	I	I	60	None/Unknown	No/Unknown	No radiation and/or cancer-directed surgery	15	11	0	41	Alive	52	White	Single (never married)	20	T1	N0	M0	Alive or dead due to cancer	Alive or dead of other cause	Yes	One primary only	Any Medicaid	Female
2012	180	Moderately differentiated; Grade II	Not a paired site	8263/3: Adenocarcinoma in tubulovillous adenoma	IV	IVA	40	None/Unknown	No/Unknown	No radiation and/or cancer-directed surgery	40	25	2	4	Dead	87	White	Married (including common law)	10	T3	N1b	M1a	Alive or dead due to cancer	Dead (attributable to this cancer dx)	Yes	One primary only	Insured/No specifics	Male
2012	180	Moderately differentiated; Grade II	Not a paired site	8140/3: Adenocarcinoma, NOS	IIIB	IIIB	40	None/Unknown	No/Unknown	No radiation and/or cancer-directed surgery	52	32	2	39	Alive	58	White	Married (including common law)	10	T3	N1b	M0	Alive or dead due to cancer	Alive or dead of other cause	Yes	One primary only	Insured/No specifics	Male
2012	180	Moderately differentiated; Grade II	Not a paired site	8263/3: Adenocarcinoma in tubulovillous adenoma	IV	IVB	40	None/Unknown	Yes	No radiation and/or cancer-directed surgery	50	22	4	12	Dead	61	Black	Married (including common law)	20	T3	N2a	M1b	Alive or dead due to cancer	Dead (attributable to this cancer dx)	Yes	One primary only	Insured	Female
2012	180	Moderately differentiated; Grade II	Not a paired site	8210/3: Adenocarcinoma in adenomatous polyp	IV	IVA	40	None/Unknown	Yes	No radiation and/or cancer-directed surgery	37	45	6	39	Alive	52	Asian or Pacific Islander	Single (never married)	10	T3	N2a	M1a	Alive or dead due to cancer	Alive or dead of other cause	Yes	One primary only	Insured	Female
2012	180	Poorly differentiated; Grade III	Not a paired site	8140/3: Adenocarcinoma, NOS	IIIB	IIIB	40	None/Unknown	No/Unknown	No radiation and/or cancer-directed surgery	50	23	3	24	Dead	81	White	Widowed	10	T3	N1b	M0	Alive or dead due to cancer	Dead (attributable to this cancer dx)	Yes	One primary only	Insured	Female
2012	180	Unknown	Not a paired site	8140/3: Adenocarcinoma, NOS	IV	IVB	0	None/Unknown	Yes	No radiation and/or cancer-directed surgery	34	0	98	23	Dead	56	Black	Married (including common law)	10	TX	N1NOS	M1b	Alive or dead due to cancer	Dead (attributable to this cancer dx)	Yes	One primary only	Insured	Female
2012	187	Moderately differentiated; Grade II	Not a paired site	8140/3: Adenocarcinoma, NOS	IV	IVB	40	None/Unknown	Yes	No radiation and/or cancer-directed surgery	87	20	7	39	Dead	40	White	Single (never married)	10	T4a	N2b	M1b	Alive or dead due to cancer	Dead (attributable to this cancer dx)	Yes	One primary only	Any Medicaid	Female
2012	199	Poorly differentiated; Grade III	Not a paired site	8140/3: Adenocarcinoma, NOS	IV	IVB	30	None/Unknown	Yes	No radiation and/or cancer-directed surgery	22	29	22	17	Dead	49	White	Married (including common law)	20	T4a	N2b	M1b	Alive or dead due to cancer	Dead (attributable to this cancer dx)	Yes	1st of 2 or more primaries	Insured	Male
2012	187	Unknown	Not a paired site	8140/3: Adenocarcinoma, NOS	IV	IVB	0	None/Unknown	No/Unknown	No radiation and/or cancer-directed surgery	999	0	98	12	Dead	64	White	Married (including common law)	10	T4b	N0	M1b	Alive or dead due to cancer	Dead (attributable to this cancer dx)	Yes	One primary only	Insured	Female
2012	184	Poorly differentiated; Grade III	Not a paired site	8140/3: Adenocarcinoma, NOS	IV	IVB	40	None/Unknown	No/Unknown	No radiation and/or cancer-directed surgery	50	20	13	23	Dead	64	White	Married (including common law)	20	T4a	N2b	M1b	Alive or dead due to cancer	Dead (attributable to this cancer dx)	Yes	One primary only	Insured/No specifics	Female
2012	199	Moderately differentiated; Grade II	Not a paired site	8263/3: Adenocarcinoma in tubulovillous adenoma	IV	IVA	30	None/Unknown	Yes	No radiation and/or cancer-directed surgery	70	21	0	12	Dead	46	White	Married (including common law)	10	T4a	N1c	M1a	Alive or dead due to cancer	Dead (attributable to this cancer dx)	Yes	One primary only	Insured	Female
2012	209	Poorly differentiated; Grade III	Not a paired site	8140/3: Adenocarcinoma, NOS	IV	IVB	0	None/Unknown	Yes	No radiation and/or cancer-directed surgery	999	0	98	8	Dead	73	White	Married (including common law)	10	T1	N1NOS	M1b	Alive or dead due to cancer	Dead (attributable to this cancer dx)	Yes	One primary only	Insured	Female
2012	186	Moderately differentiated; Grade II	Not a paired site	8263/3: Adenocarcinoma in tubulovillous adenoma	IV	IVA	40	None/Unknown	No/Unknown	No radiation and/or cancer-directed surgery	40	63	0	38	Alive	55	White	Single (never married)	20	T3	N0	M1a	Alive or dead due to cancer	Alive or dead of other cause	Yes	One primary only	Insured	Female
2012	199	Moderately differentiated; Grade II	Not a paired site	8140/3: Adenocarcinoma, NOS	UNK Stage	UNK Stage	0	None/Unknown	No/Unknown	No radiation and/or cancer-directed surgery	40	0	98	21	Dead	80	White	Single (never married)	10	TX	NX	M0	Alive or dead due to cancer	Dead (attributable to this cancer dx)	Yes	One primary only	Insured	Female
2012	209	Moderately differentiated; Grade II	Not a paired site	8140/3: Adenocarcinoma, NOS	IV	IVB	0	None/Unknown	Yes	No radiation and/or cancer-directed surgery	999	0	98	36	Alive	35	White	Divorced	20	TX	N0	M1b	Alive or dead due to cancer	Alive or dead of other cause	Yes	One primary only	Insured	Female
2012	199	Moderately differentiated; Grade II	Not a paired site	8140/3: Adenocarcinoma, NOS	IIIA	IIIA	30	None/Unknown	No/Unknown	No radiation and/or cancer-directed surgery	20	17	1	38	Dead	70	White	Married (including common law)	10	T2	N1a	M0	Alive or dead due to cancer	Dead (attributable to this cancer dx)	Yes	One primary only	Insured	Male
2012	209	Moderately differentiated; Grade II	Not a paired site	8140/3: Adenocarcinoma, NOS	IIIB	IIIB	30	Beam radiation	Yes	Radiation prior to surgery	33	27	1	37	Dead	74	White	Divorced	20	T3	N1a	M0	Alive or dead due to cancer	Dead (attributable to this cancer dx)	Yes	One primary only	Any Medicaid	Female
2012	209	Unknown	Not a paired site	8140/3: Adenocarcinoma, NOS	IIA	IIA	0	Beam radiation	Yes	No radiation and/or cancer-directed surgery	999	0	98	6	Dead	67	White	Divorced	20	T3	N0	M0	Dead (attributable to causes other than this cancer dx)	Alive or dead of other cause	Yes	One primary only	Any Medicaid	Male
2012	209	Well differentiated; Grade I	Not a paired site	8210/3: Adenocarcinoma in adenomatous polyp	0	0	30	None/Unknown	No/Unknown	No radiation and/or cancer-directed surgery	10	0	98	39	Alive	46	White	Married (including common law)	20	Tis	N0	M0	Alive or dead due to cancer	Alive or dead of other cause	Yes	One primary only	Insured	Female
2012	182	Moderately differentiated; Grade II	Not a paired site	8140/3: Adenocarcinoma, NOS	IIIA	IIIA	40	None/Unknown	Yes	No radiation and/or cancer-directed surgery	28	19	1	38	Alive	54	White	Married (including common law)	20	T2	N1a	M0	Alive or dead due to cancer	Alive or dead of other cause	Yes	One primary only	Insured	Male
2012	186	Moderately differentiated; Grade II	Not a paired site	8140/3: Adenocarcinoma, NOS	IIIB	IIIB	40	None/Unknown	Yes	No radiation and/or cancer-directed surgery	50	14	3	44	Alive	55	Unknown	Single (never married)	10	T3	N1b	M0	Alive or dead due to cancer	Alive or dead of other cause	Yes	One primary only	Any Medicaid	Female
2012	180	Moderately differentiated; Grade II	Not a paired site	8140/3: Adenocarcinoma, NOS	IIB	IIB	40	None/Unknown	No/Unknown	No radiation and/or cancer-directed surgery	37	27	0	38	Alive	72	White	Married (including common law)	20	T4a	N0	M0	Alive or dead due to cancer	Alive or dead of other cause	Yes	One primary only	Insured	Female
2012	187	Poorly differentiated; Grade III	Not a paired site	8140/3: Adenocarcinoma, NOS	IV	IVA	30	None/Unknown	Yes	No radiation and/or cancer-directed surgery	35	12	9	43	Dead	72	White	Single (never married)	20	T4a	N1NOS	M1a	Alive or dead due to cancer	Dead (attributable to this cancer dx)	Yes	One primary only	Insured/No specifics	Female
2012	184	Poorly differentiated; Grade III	Not a paired site	8255/3: Adenocarcinoma with mixed subtypes	UNK Stage	IIIB	30	None/Unknown	Yes	No radiation and/or cancer-directed surgery	30	97	99	4	Dead	63	White	Married (including common law)	20	T3	N1c	M0	Alive or dead due to cancer	Dead (attributable to this cancer dx)	Yes	One primary only	Insured	Female
2012	182	Poorly differentiated; Grade III	Not a paired site	8263/3: Adenocarcinoma in tubulovillous adenoma	IIIC	IIIC	40	None/Unknown	Yes	No radiation and/or cancer-directed surgery	87	24	15	36	Alive	39	White	Unknown	10	T3	N2b	M0	Alive or dead due to cancer	Alive or dead of other cause	Yes	One primary only	Any Medicaid	Female
2012	209	Moderately differentiated; Grade II	Not a paired site	8140/3: Adenocarcinoma, NOS	I	I	30	None/Unknown	No/Unknown	No radiation and/or cancer-directed surgery	50	22	0	46	Alive	75	White	Married (including common law)	20	T2	N0	M0	Alive or dead due to cancer	Alive or dead of other cause	Yes	1st of 2 or more primaries	Insured	Male
2012	187	Well differentiated; Grade I	Not a paired site	8263/3: Adenocarcinoma in tubulovillous adenoma	I	I	28	None/Unknown	No/Unknown	No radiation and/or cancer-directed surgery	50	0	98	45	Alive	53	Black	Single (never married)	20	T1	N0	M0	Alive or dead due to cancer	Alive or dead of other cause	Yes	One primary only	Insured	Male
2012	186	Moderately differentiated; Grade II	Not a paired site	8140/3: Adenocarcinoma, NOS	IIB	IIC	41	None/Unknown	No/Unknown	No radiation and/or cancer-directed surgery	37	16	0	7	Dead	92	White	Widowed	20	T4b	N0	M0	Dead (attributable to causes other than this cancer dx)	Alive or dead of other cause	Yes	One primary only	Insured	Female
2012	182	Moderately differentiated; Grade II	Not a paired site	8140/3: Adenocarcinoma, NOS	IIB	IIC	41	None/Unknown	No/Unknown	No radiation and/or cancer-directed surgery	80	20	0	33	Alive	84	White	Married (including common law)	20	T4b	N0	M0	Alive or dead due to cancer	Alive or dead of other cause	Yes	One primary only	Insured	Male
2012	184	Moderately differentiated; Grade II	Not a paired site	8140/3: Adenocarcinoma, NOS	IIIB	IIIB	40	None/Unknown	Yes	No radiation and/or cancer-directed surgery	37	4	1	44	Alive	75	White	Married (including common law)	10	T4a	N1a	M0	Alive or dead due to cancer	Alive or dead of other cause	Yes	One primary only	Any Medicaid	Female
2012	187	Moderately differentiated; Grade II	Not a paired site	8263/3: Adenocarcinoma in tubulovillous adenoma	I	I	28	None/Unknown	No/Unknown	No radiation and/or cancer-directed surgery	999	0	98	38	Alive	51	White	Married (including common law)	20	T1	N0	M0	Alive or dead due to cancer	Alive or dead of other cause	Yes	One primary only	Insured	Male
2012	186	Moderately differentiated; Grade II	Not a paired site	8140/3: Adenocarcinoma, NOS	IIA	IIA	40	None/Unknown	No/Unknown	No radiation and/or cancer-directed surgery	55	21	0	40	Alive	47	White	Married (including common law)	20	T3	N0	M0	Alive or dead due to cancer	Alive or dead of other cause	Yes	One primary only	Insured	Male
2012	182	Moderately differentiated; Grade II	Not a paired site	8140/3: Adenocarcinoma, NOS	IIIB	IIIB	40	None/Unknown	Yes	No radiation and/or cancer-directed surgery	54	45	3	38	Alive	46	White	Married (including common law)	20	T3	N1b	M0	Alive or dead due to cancer	Alive or dead of other cause	Yes	One primary only	Insured	Female
2012	184	Poorly differentiated; Grade III	Not a paired site	8140/3: Adenocarcinoma, NOS	IIIB	IIIB	40	None/Unknown	No/Unknown	No radiation and/or cancer-directed surgery	40	53	2	44	Alive	42	White	Single (never married)	20	T3	N1b	M0	Alive or dead due to cancer	Alive or dead of other cause	Yes	One primary only	Insured	Male
2012	180	Moderately differentiated; Grade II	Not a paired site	8140/3: Adenocarcinoma, NOS	IIIB	IIIB	40	None/Unknown	Yes	No radiation and/or cancer-directed surgery	32	24	3	39	Alive	60	Unknown	Divorced	10	T4a	N1b	M0	Alive or dead due to cancer	Alive or dead of other cause	Yes	One primary only	Insured	Female
2012	187	Moderately differentiated; Grade II	Not a paired site	8210/3: Adenocarcinoma in adenomatous polyp	IIIA	IIIA	30	None/Unknown	No/Unknown	No radiation and/or cancer-directed surgery	13	18	1	44	Alive	50	White	Married (including common law)	10	T1	N1a	M0	Alive or dead due to cancer	Alive or dead of other cause	Yes	One primary only	Insured	Male
2012	180	Moderately differentiated; Grade II	Not a paired site	8480/3: Mucinous adenocarcinoma	IIIB	IIIC	41	None/Unknown	Yes	No radiation and/or cancer-directed surgery	117	21	3	11	Dead	54	White	Single (never married)	10	T4b	N1b	M0	Alive or dead due to cancer	Dead (attributable to this cancer dx)	Yes	One primary only	Insured	Male
2012	187	Moderately differentiated; Grade II	Not a paired site	8140/3: Adenocarcinoma, NOS	IIB	IIB	30	None/Unknown	Yes	No radiation and/or cancer-directed surgery	110	10	0	44	Alive	80	White	Widowed	20	T4a	N0	M0	Alive or dead due to cancer	Alive or dead of other cause	Yes	One primary only	Insured	Male
2012	209	Moderately differentiated; Grade II	Not a paired site	8140/3: Adenocarcinoma, NOS	IIIA	IIIA	50	Beam radiation	Yes	Radiation prior to surgery	33	12	1	45	Alive	50	White	Divorced	20	T2	N1a	M0	Alive or dead due to cancer	Alive or dead of other cause	Yes	One primary only	Any Medicaid	Female
2012	209	Moderately differentiated; Grade II	Not a paired site	8140/3: Adenocarcinoma, NOS	I	I	50	Beam radiation	Yes	Radiation prior to surgery	40	16	0	44	Alive	67	White	Married (including common law)	20	T2	N0	M0	Alive or dead due to cancer	Alive or dead of other cause	Yes	One primary only	Insured	Male
2012	209	Moderately differentiated; Grade II	Not a paired site	8140/3: Adenocarcinoma, NOS	IV	IVA	0	None/Unknown	No/Unknown	No radiation and/or cancer-directed surgery	74	0	98	25	Dead	65	White	Unmarried or Domestic Partner	20	T3	N2a	M1a	Alive or dead due to cancer	Dead (attributable to this cancer dx)	Yes	One primary only	Insured	Female
2012	180	Unknown	Not a paired site	8263/3: Adenocarcinoma in tubulovillous adenoma	IV	IVA	40	None/Unknown	No/Unknown	No radiation and/or cancer-directed surgery	65	19	9	4	Dead	83	White	Unknown	10	T4a	N2b	M1a	Alive or dead due to cancer	Dead (attributable to this cancer dx)	Yes	One primary only	Insured	Female
2012	209	Moderately differentiated; Grade II	Not a paired site	8263/3: Adenocarcinoma in tubulovillous adenoma	I	I	30	None/Unknown	No/Unknown	No radiation and/or cancer-directed surgery	5	2	0	47	Alive	56	White	Single (never married)	20	T1	N0	M0	Alive or dead due to cancer	Alive or dead of other cause	Yes	1st of 2 or more primaries	Insured	Male
2012	209	Moderately differentiated; Grade II	Not a paired site	8140/3: Adenocarcinoma, NOS	IV	IVA	0	None/Unknown	Yes	No radiation and/or cancer-directed surgery	999	0	98	37	Alive	69	White	Married (including common law)	20	TX	NX	M1a	Alive or dead due to cancer	Alive or dead of other cause	Yes	One primary only	Insured	Female
2012	209	Well differentiated; Grade I	Not a paired site	8140/3: Adenocarcinoma, NOS	I	I	30	None/Unknown	No/Unknown	No radiation and/or cancer-directed surgery	25	13	0	44	Alive	62	White	Married (including common law)	20	T2	N0	M0	Alive or dead due to cancer	Alive or dead of other cause	Yes	One primary only	Insured	Male
2012	180	Unknown	Not a paired site	8140/3: Adenocarcinoma, NOS	IV	IVNOS	0	None/Unknown	Yes	No radiation and/or cancer-directed surgery	999	0	98	12	Dead	63	White	Single (never married)	10	TX	N1NOS	M1NOS	Alive or dead due to cancer	Dead (attributable to this cancer dx)	Yes	One primary only	Insurance status unknown	Male
2012	209	Moderately differentiated; Grade II	Not a paired site	8140/3: Adenocarcinoma, NOS	IIB	IIC	0	Beam radiation	Yes	No radiation and/or cancer-directed surgery	999	0	98	37	Alive	50	Unknown	Married (including common law)	20	T4b	N0	M0	Alive or dead due to cancer	Alive or dead of other cause	Yes	One primary only	Any Medicaid	Female
2012	185	Poorly differentiated; Grade III	Not a paired site	8140/3: Adenocarcinoma, NOS	IV	IVA	30	None/Unknown	Yes	No radiation and/or cancer-directed surgery	62	17	1	20	Dead	62	White	Married (including common law)	10	T4a	N1a	M1a	Alive or dead due to cancer	Dead (attributable to this cancer dx)	Yes	One primary only	Insured	Male
2012	183	Moderately differentiated; Grade II	Not a paired site	8140/3: Adenocarcinoma, NOS	IIIA	IIIA	40	None/Unknown	Yes	No radiation and/or cancer-directed surgery	38	27	1	41	Alive	53	White	Single (never married)	20	T2	N1a	M0	N/A not first tumor	N/A not first tumor	No	2nd of 2 or more primaries	Insured	Female
2012	180	Moderately differentiated; Grade II	Not a paired site	8263/3: Adenocarcinoma in tubulovillous adenoma	I	I	28	None/Unknown	No/Unknown	No radiation and/or cancer-directed surgery	999	0	98	17	Dead	81	White	Widowed	20	T1	N0	M0	N/A not first tumor	N/A not first tumor	Yes	2nd of 2 or more primaries	Any Medicaid	Female
2012	187	Moderately differentiated; Grade II	Not a paired site	8140/3: Adenocarcinoma, NOS	IIIB	IIIC	40	None/Unknown	Yes	No radiation and/or cancer-directed surgery	90	41	2	29	Alive	49	Black	Single (never married)	20	T4b	N1b	M0	Alive or dead due to cancer	Alive or dead of other cause	Yes	One primary only	Insured	Female
2012	182	Unknown	Not a paired site	8140/3: Adenocarcinoma, NOS	IV	IVB	0	None/Unknown	Yes	No radiation and/or cancer-directed surgery	80	99	99	12	Dead	56	Black	Divorced	20	TX	N1NOS	M1b	Alive or dead due to cancer	Dead (attributable to this cancer dx)	Yes	One primary only	Insured	Male
2012	199	Poorly differentiated; Grade III	Not a paired site	8140/3: Adenocarcinoma, NOS	IV	IVB	30	None/Unknown	Yes	No radiation and/or cancer-directed surgery	100	20	0	33	Dead	44	Black	Unknown	10	T3	N0	M1b	Alive or dead due to cancer	Dead (attributable to this cancer dx)	Yes	One primary only	Insured/No specifics	Male
2012	182	Moderately differentiated; Grade II	Not a paired site	8263/3: Adenocarcinoma in tubulovillous adenoma	IV	IVA	40	None/Unknown	Yes	No radiation and/or cancer-directed surgery	115	32	1	47	Alive	71	White	Married (including common law)	10	T3	N1a	M1a	Alive or dead due to cancer	Alive or dead of other cause	Yes	1st of 2 or more primaries	Insured/No specifics	Male
2012	180	Moderately differentiated; Grade II	Not a paired site	8140/3: Adenocarcinoma, NOS	IIIB	IIIB	40	None/Unknown	No/Unknown	No radiation and/or cancer-directed surgery	115	3	1	46	Alive	71	White	Married (including common law)	10	T3	N1a	M0	N/A not first tumor	N/A not first tumor	No	2nd of 2 or more primaries	Insured	Male
2011	187	Unknown	Not a paired site	8140/3: Adenocarcinoma, NOS	IV	IVB	50	None/Unknown	Yes	No radiation and/or cancer-directed surgery	46	0	98	47	Dead	31	White	Unknown	10	TX	N1NOS	M1b	Alive or dead due to cancer	Dead (attributable to this cancer dx)	Yes	One primary only	Insurance status unknown	Male
2012	189	Unknown	Not a paired site	8140/3: Adenocarcinoma, NOS	IV	IVB	0	None/Unknown	Yes	No radiation and/or cancer-directed surgery	999	0	98	20	Dead	77	White	Single (never married)	10	TX	NX	M1b	Alive or dead due to cancer	Dead (attributable to this cancer dx)	Yes	One primary only	Any Medicaid	Female
2012	187	Poorly differentiated; Grade III	Not a paired site	8140/3: Adenocarcinoma, NOS	IV	IVB	32	None/Unknown	Yes	No radiation and/or cancer-directed surgery	65	16	16	17	Dead	68	White	Married (including common law)	20	T4b	N2b	M1b	Alive or dead due to cancer	Dead (attributable to this cancer dx)	Yes	One primary only	Insured	Male
2012	199	Poorly differentiated; Grade III	Not a paired site	8140/3: Adenocarcinoma, NOS	IV	IVA	30	None/Unknown	Yes	No radiation and/or cancer-directed surgery	62	22	5	13	Dead	76	Black	Divorced	20	T4a	N2a	M1a	Alive or dead due to cancer	Dead (attributable to this cancer dx)	Yes	One primary only	Insured/No specifics	Female
2012	182	Moderately differentiated; Grade II	Not a paired site	8140/3: Adenocarcinoma, NOS	IV	IVA	40	None/Unknown	No/Unknown	No radiation and/or cancer-directed surgery	60	23	2	21	Dead	58	Black	Unknown	20	T3	N1b	M1a	Alive or dead due to cancer	Dead (attributable to this cancer dx)	Yes	One primary only	Insured	Female
2012	209	Poorly differentiated; Grade III	Not a paired site	8140/3: Adenocarcinoma, NOS	IIA	IIA	50	Beam radiation	Yes	Radiation prior to surgery	60	9	0	37	Alive	57	White	Single (never married)	20	T3	N0	M0	Alive or dead due to cancer	Alive or dead of other cause	Yes	One primary only	Insured	Male
2012	199	Moderately differentiated; Grade II	Not a paired site	8140/3: Adenocarcinoma, NOS	IV	IVA	31	None/Unknown	Yes	No radiation and/or cancer-directed surgery	42	16	2	23	Dead	68	White	Married (including common law)	20	T3	N1b	M1a	Alive or dead due to cancer	Dead (attributable to this cancer dx)	Yes	One primary only	Insured	Female
2012	209	Unknown	Not a paired site	8140/3: Adenocarcinoma, NOS	IIIA	IIIA	0	Beam radiation	Yes	No radiation and/or cancer-directed surgery	999	0	98	45	Alive	49	White	Unknown	10	T2	N1NOS	M0	Alive or dead due to cancer	Alive or dead of other cause	Yes	One primary only	Insured	Male
2012	184	Poorly differentiated; Grade III	Not a paired site	8490/3: Signet ring cell carcinoma	IV	IVA	0	None/Unknown	Yes	No radiation and/or cancer-directed surgery	999	0	98	13	Dead	53	Black	Single (never married)	20	TX	N0	M1a	Alive or dead due to cancer	Dead (attributable to this cancer dx)	Yes	One primary only	Any Medicaid	Male
2012	187	Poorly differentiated; Grade III	Not a paired site	8480/3: Mucinous adenocarcinoma	IIIB	IIIB	30	None/Unknown	Yes	No radiation and/or cancer-directed surgery	41	9	2	34	Dead	70	White	Married (including common law)	20	T4a	N1b	M0	Alive or dead due to cancer	Dead (attributable to this cancer dx)	Yes	One primary only	Insured	Male
2012	180	Poorly differentiated; Grade III	Not a paired site	8255/3: Adenocarcinoma with mixed subtypes	IIIC	IIIC	40	None/Unknown	Yes	No radiation and/or cancer-directed surgery	60	24	8	39	Alive	54	White	Divorced	10	T3	N2b	M0	N/A not first tumor	N/A not first tumor	Yes	2nd of 2 or more primaries	Insured	Female
2012	184	Poorly differentiated; Grade III	Not a paired site	8140/3: Adenocarcinoma, NOS	IV	IVA	40	None/Unknown	Yes	No radiation and/or cancer-directed surgery	60	57	2	14	Dead	39	White	Married (including common law)	20	T4a	N1b	M1a	Alive or dead due to cancer	Dead (attributable to this cancer dx)	Yes	One primary only	Insured	Female
2012	209	Moderately differentiated; Grade II	Not a paired site	8140/3: Adenocarcinoma, NOS	IV	IVB	0	None/Unknown	No/Unknown	No radiation and/or cancer-directed surgery	70	0	98	19	Dead	55	White	Married (including common law)	10	T3	N0	M1b	Alive or dead due to cancer	Dead (attributable to this cancer dx)	Yes	One primary only	Insured	Female
2012	187	Moderately differentiated; Grade II	Not a paired site	8140/3: Adenocarcinoma, NOS	IIIB	IIIB	40	None/Unknown	Yes	No radiation and/or cancer-directed surgery	30	5	1	17	Dead	42	Asian or Pacific Islander	Married (including common law)	10	T4a	N1a	M0	Alive or dead due to cancer	Dead (attributable to this cancer dx)	Yes	One primary only	Insured	Male
2012	187	Moderately differentiated; Grade II	Not a paired site	8210/3: Adenocarcinoma in adenomatous polyp	IV	IVA	30	None/Unknown	Yes	No radiation and/or cancer-directed surgery	45	12	0	45	Alive	45	White	Single (never married)	10	T4a	N0	M1a	Alive or dead due to cancer	Alive or dead of other cause	Yes	1st of 2 or more primaries	Any Medicaid	Female
2012	209	Poorly differentiated; Grade III	Not a paired site	8140/3: Adenocarcinoma, NOS	IIIC	IIIC	30	Beam radiation	Yes	Radiation after surgery	100	16	15	46	Alive	60	Asian or Pacific Islander	Married (including common law)	20	T4a	N2b	M0	Alive or dead due to cancer	Alive or dead of other cause	Yes	One primary only	Any Medicaid	Male
2012	182	Poorly differentiated; Grade III	Not a paired site	8140/3: Adenocarcinoma, NOS	IV	IVA	40	None/Unknown	Yes	No radiation and/or cancer-directed surgery	20	40	0	45	Dead	48	White	Married (including common law)	10	T4b	N0	M1a	Alive or dead due to cancer	Dead (attributable to this cancer dx)	Yes	One primary only	Insured	Female
2012	187	Poorly differentiated; Grade III	Not a paired site	8140/3: Adenocarcinoma, NOS	IIIB	IIIB	30	None/Unknown	Yes	No radiation and/or cancer-directed surgery	40	13	2	37	Alive	60	White	Married (including common law)	10	T4a	N1b	M0	Alive or dead due to cancer	Alive or dead of other cause	Yes	One primary only	Insured	Male
2012	187	Moderately differentiated; Grade II	Not a paired site	8140/3: Adenocarcinoma, NOS	IV	IVA	40	Beam radiation	Yes	Radiation prior to surgery	25	26	5	27	Dead	50	White	Married (including common law)	20	T4a	N2a	M1a	Alive or dead due to cancer	Dead (attributable to this cancer dx)	Yes	One primary only	Insured	Female
2012	209	Moderately differentiated; Grade II	Not a paired site	8140/3: Adenocarcinoma, NOS	IIB	IIC	0	Beam radiation	Yes	No radiation and/or cancer-directed surgery	50	0	98	28	Dead	61	White	Single (never married)	20	T4b	N0	M0	Alive or dead due to cancer	Dead (attributable to this cancer dx)	Yes	One primary only	Any Medicaid	Male
2012	199	Poorly differentiated; Grade III	Not a paired site	8255/3: Adenocarcinoma with mixed subtypes	IV	IVB	30	None/Unknown	Yes	No radiation and/or cancer-directed surgery	45	2	0	20	Dead	59	White	Married (including common law)	20	T4b	N0	M1b	Alive or dead due to cancer	Dead (attributable to this cancer dx)	Yes	One primary only	Insured	Male
2012	180	Undifferentiated; anaplastic; Grade IV	Not a paired site	8480/3: Mucinous adenocarcinoma	IIIB	IIIB	40	None/Unknown	Yes	No radiation and/or cancer-directed surgery	55	30	1	45	Alive	54	White	Married (including common law)	10	T4a	N1a	M0	Alive or dead due to cancer	Alive or dead of other cause	Yes	One primary only	Insured	Female
2012	180	Moderately differentiated; Grade II	Not a paired site	8210/3: Adenocarcinoma in adenomatous polyp	IIIB	IIIB	40	None/Unknown	No/Unknown	No radiation and/or cancer-directed surgery	45	17	3	13	Dead	84	White	Divorced	10	T4a	N1b	M0	Alive or dead due to cancer	Dead (attributable to this cancer dx)	Yes	One primary only	Insured/No specifics	Female
2012	182	Moderately differentiated; Grade II	Not a paired site	8140/3: Adenocarcinoma, NOS	IV	IVB	40	None/Unknown	Yes	No radiation and/or cancer-directed surgery	70	31	11	7	Dead	82	White	Married (including common law)	10	T4a	N2b	M1b	Dead (missing/unknown COD)	Dead (missing/unknown COD)	Yes	One primary only	Insured	Male
2012	180	Poorly differentiated; Grade III	Not a paired site	8140/3: Adenocarcinoma, NOS	IIIB	IIIB	40	None/Unknown	No/Unknown	No radiation and/or cancer-directed surgery	23	32	1	5	Dead	67	White	Married (including common law)	20	T4a	N1a	M0	Alive or dead due to cancer	Dead (attributable to this cancer dx)	Yes	One primary only	Insured	Male
2012	183	Poorly differentiated; Grade III	Not a paired site	8140/3: Adenocarcinoma, NOS	IIIB	IIIB	40	None/Unknown	No/Unknown	No radiation and/or cancer-directed surgery	42	16	2	8	Dead	89	White	Widowed	20	T4a	N1b	M0	Alive or dead due to cancer	Dead (attributable to this cancer dx)	Yes	One primary only	Insured	Female
2012	182	Moderately differentiated; Grade II	Not a paired site	8140/3: Adenocarcinoma, NOS	IV	IVA	40	None/Unknown	No/Unknown	No radiation and/or cancer-directed surgery	40	16	0	24	Dead	60	Asian or Pacific Islander	Married (including common law)	20	T4a	N1c	M1a	Alive or dead due to cancer	Dead (attributable to this cancer dx)	Yes	One primary only	Insured	Male
2012	180	Poorly differentiated; Grade III	Not a paired site	8490/3: Signet ring cell carcinoma	IV	IVB	0	None/Unknown	Yes	No radiation and/or cancer-directed surgery	38	0	98	20	Dead	60	White	Married (including common law)	20	TX	N1b	M1b	Alive or dead due to cancer	Dead (attributable to this cancer dx)	Yes	One primary only	Insured	Male
2012	209	Moderately differentiated; Grade II	Not a paired site	8140/3: Adenocarcinoma, NOS	IV	IVB	20	None/Unknown	Yes	No radiation and/or cancer-directed surgery	55	0	98	32	Dead	55	White	Divorced	20	T4b	N0	M1b	Alive or dead due to cancer	Dead (attributable to this cancer dx)	Yes	One primary only	Insured	Female
2012	187	Poorly differentiated; Grade III	Not a paired site	8140/3: Adenocarcinoma, NOS	IIIB	IIIB	80	None/Unknown	Yes	No radiation and/or cancer-directed surgery	35	34	2	43	Alive	57	White	Married (including common law)	20	T3	N1b	M0	Alive or dead due to cancer	Alive or dead of other cause	Yes	One primary only	Insured	Male
2012	182	Moderately differentiated; Grade II	Not a paired site	8480/3: Mucinous adenocarcinoma	UNK Stage	IIIC	40	None/Unknown	Yes	No radiation and/or cancer-directed surgery	750	53	9	43	Alive	43	White	Married (including common law)	10	T4a	N2b	M0	Alive or dead due to cancer	Alive or dead of other cause	Yes	One primary only	Insured	Female
2012	209	Poorly differentiated; Grade III	Not a paired site	8140/3: Adenocarcinoma, NOS	IV	IVA	20	None/Unknown	No/Unknown	No radiation and/or cancer-directed surgery	70	0	98	14	Dead	38	Black	Married (including common law)	10	T3	N0	M1a	Alive or dead due to cancer	Dead (attributable to this cancer dx)	Yes	One primary only	Any Medicaid	Female
2012	180	Poorly differentiated; Grade III	Not a paired site	8140/3: Adenocarcinoma, NOS	IV	IVA	41	None/Unknown	Yes	No radiation and/or cancer-directed surgery	45	19	5	4	Dead	21	White	Single (never married)	10	T4a	N2a	M1a	Dead (missing/unknown COD)	Dead (missing/unknown COD)	Yes	One primary only	Insured	Male
2012	187	Moderately differentiated; Grade II	Not a paired site	8140/3: Adenocarcinoma, NOS	IIIB	IIIB	30	None/Unknown	Yes	No radiation and/or cancer-directed surgery	71	21	1	41	Alive	70	White	Married (including common law)	20	T4a	N1a	M0	Alive or dead due to cancer	Alive or dead of other cause	Yes	One primary only	Insured	Male
2012	209	Poorly differentiated; Grade III	Not a paired site	8140/3: Adenocarcinoma, NOS	IV	IVB	0	None/Unknown	Yes	No radiation and/or cancer-directed surgery	70	0	98	8	Dead	52	White	Divorced	10	T4b	N2NOS	M1b	Alive or dead due to cancer	Dead (attributable to this cancer dx)	Yes	One primary only	Any Medicaid	Female
2011	209	Poorly differentiated; Grade III	Not a paired site	8480/3: Mucinous adenocarcinoma	IV	IVB	70	None/Unknown	Yes	No radiation and/or cancer-directed surgery	75	38	3	26	Dead	59	White	Single (never married)	20	T4b	N1b	M1b	Alive or dead due to cancer	Dead (attributable to this cancer dx)	Yes	One primary only	Insured	Female
2011	180	Moderately differentiated; Grade II	Not a paired site	8140/3: Adenocarcinoma, NOS	IV	IVA	40	None/Unknown	No/Unknown	No radiation and/or cancer-directed surgery	30	10	2	4	Dead	82	White	Married (including common law)	10	T2	N1b	M1a	Alive or dead due to cancer	Dead (attributable to this cancer dx)	Yes	One primary only	Insured	Male
2012	182	Moderately differentiated; Grade II	Not a paired site	8140/3: Adenocarcinoma, NOS	IV	IVA	40	None/Unknown	No/Unknown	No radiation and/or cancer-directed surgery	45	25	10	15	Dead	65	White	Single (never married)	10	T4a	N2b	M1a	Alive or dead due to cancer	Dead (attributable to this cancer dx)	Yes	One primary only	Insured	Male
2012	182	Unknown	Not a paired site	8263/3: Adenocarcinoma in tubulovillous adenoma	IV	IVA	0	None/Unknown	Yes	No radiation and/or cancer-directed surgery	999	0	98	11	Dead	84	White	Widowed	20	T4b	N0	M1a	Alive or dead due to cancer	Dead (attributable to this cancer dx)	Yes	1st of 2 or more primaries	Insured	Male
2012	209	Unknown	Not a paired site	8263/3: Adenocarcinoma in tubulovillous adenoma	IV	IVA	0	None/Unknown	Yes	No radiation and/or cancer-directed surgery	999	0	98	11	Dead	84	White	Widowed	20	TX	N0	M1a	N/A not first tumor	N/A not first tumor	Yes	2nd of 2 or more primaries	Insured	Male
2012	182	Moderately differentiated; Grade II	Not a paired site	8480/3: Mucinous adenocarcinoma	IIA	IIA	40	None/Unknown	No/Unknown	No radiation and/or cancer-directed surgery	65	33	0	35	Dead	45	White	Single (never married)	20	T3	N0	M0	Dead (attributable to causes other than this cancer dx)	Alive or dead of other cause	Yes	One primary only	Insured	Male
2012	182	Moderately differentiated; Grade II	Not a paired site	8480/3: Mucinous adenocarcinoma	IIB	IIB	40	None/Unknown	No/Unknown	No radiation and/or cancer-directed surgery	45	17	0	44	Alive	63	White	Single (never married)	20	T4a	N0	M0	Alive or dead due to cancer	Alive or dead of other cause	Yes	One primary only	Insured	Male
2012	209	Well differentiated; Grade I	Not a paired site	8210/3: Adenocarcinoma in adenomatous polyp	IIA	IIA	30	Beam radiation	Yes	Radiation prior to surgery	999	16	0	43	Alive	63	White	Married (including common law)	10	T3	N0	M0	Alive or dead due to cancer	Alive or dead of other cause	Yes	1st of 2 or more primaries	Insured	Male
2012	180	Moderately differentiated; Grade II	Not a paired site	8140/3: Adenocarcinoma, NOS	IV	IVA	0	None/Unknown	No/Unknown	No radiation and/or cancer-directed surgery	50	0	98	21	Dead	88	White	Widowed	10	T1	N1a	M1a	Alive or dead due to cancer	Dead (attributable to this cancer dx)	Yes	One primary only	Insured	Female
2012	184	Moderately differentiated; Grade II	Not a paired site	8480/3: Mucinous adenocarcinoma	IV	IVNOS	41	None/Unknown	Yes	No radiation and/or cancer-directed surgery	999	21	1	31	Alive	54	White	Married (including common law)	10	T4b	N1a	M1NOS	Alive or dead due to cancer	Alive or dead of other cause	Yes	One primary only	Insured	Male
2012	199	Moderately differentiated; Grade II	Not a paired site	8140/3: Adenocarcinoma, NOS	IV	IVA	60	None/Unknown	Yes	No radiation and/or cancer-directed surgery	100	29	0	39	Alive	59	White	Married (including common law)	20	T4b	N0	M1a	Alive or dead due to cancer	Alive or dead of other cause	Yes	One primary only	Insurance status unknown	Male
2012	182	Moderately differentiated; Grade II	Not a paired site	8140/3: Adenocarcinoma, NOS	IV	IVA	80	None/Unknown	No/Unknown	No radiation and/or cancer-directed surgery	60	22	3	36	Alive	76	White	Married (including common law)	20	T4b	N1b	M1a	Alive or dead due to cancer	Alive or dead of other cause	Yes	One primary only	Insured	Female
2012	180	Moderately differentiated; Grade II	Not a paired site	8140/3: Adenocarcinoma, NOS	IIB	IIB	40	None/Unknown	No/Unknown	No radiation and/or cancer-directed surgery	30	21	0	13	Dead	81	White	Widowed	20	T4a	N0	M0	Dead (attributable to causes other than this cancer dx)	Alive or dead of other cause	Yes	One primary only	Insured	Female
2012	187	Moderately differentiated; Grade II	Not a paired site	8140/3: Adenocarcinoma, NOS	IIB	IIB	70	None/Unknown	Yes	No radiation and/or cancer-directed surgery	55	39	0	36	Alive	26	Unknown	Married (including common law)	10	T4a	N0	M0	Alive or dead due to cancer	Alive or dead of other cause	Yes	One primary only	Any Medicaid	Female
2011	199	Moderately differentiated; Grade II	Not a paired site	8480/3: Mucinous adenocarcinoma	IIIB	IIIC	80	None/Unknown	Yes	No radiation and/or cancer-directed surgery	60	11	1	22	Dead	37	Unknown	Divorced	20	T4b	N1a	M0	Alive or dead due to cancer	Dead (attributable to this cancer dx)	Yes	One primary only	Any Medicaid	Male
2012	187	Moderately differentiated; Grade II	Not a paired site	8140/3: Adenocarcinoma, NOS	IV	IVA	0	None/Unknown	No/Unknown	No radiation and/or cancer-directed surgery	999	0	98	17	Dead	35	White	Married (including common law)	20	TX	N0	M1a	Alive or dead due to cancer	Dead (attributable to this cancer dx)	Yes	One primary only	Insured/No specifics	Male
2012	182	Unknown	Not a paired site	8140/3: Adenocarcinoma, NOS	IV	IVB	0	None/Unknown	Yes	No radiation and/or cancer-directed surgery	999	0	98	20	Dead	70	White	Married (including common law)	20	T3	N1NOS	M1b	Alive or dead due to cancer	Dead (attributable to this cancer dx)	Yes	One primary only	Insured	Female
2012	209	Moderately differentiated; Grade II	Not a paired site	8140/3: Adenocarcinoma, NOS	IIIB	IIIC	27	Beam radiation	Yes	Radiation after surgery	70	0	98	30	Dead	66	White	Divorced	20	T4b	N1NOS	M0	Alive or dead due to cancer	Dead (attributable to this cancer dx)	Yes	One primary only	Insured/No specifics	Female
2012	180	Moderately differentiated; Grade II	Not a paired site	8255/3: Adenocarcinoma with mixed subtypes	IIA	IIA	30	None/Unknown	Yes	No radiation and/or cancer-directed surgery	42	13	0	39	Alive	65	White	Married (including common law)	20	T3	N0	M0	Alive or dead due to cancer	Alive or dead of other cause	Yes	One primary only	Insured/No specifics	Male
2012	209	Poorly differentiated; Grade III	Not a paired site	8140/3: Adenocarcinoma, NOS	IV	IVA	0	None/Unknown	Yes	No radiation and/or cancer-directed surgery	999	0	98	45	Alive	68	White	Single (never married)	20	T3	N0	M1a	Alive or dead due to cancer	Alive or dead of other cause	Yes	1st of 2 or more primaries	Insured	Male
2012	187	Moderately differentiated; Grade II	Not a paired site	8140/3: Adenocarcinoma, NOS	IIIC	IIIB	30	None/Unknown	Yes	No radiation and/or cancer-directed surgery	36	24	5	45	Alive	66	Black	Married (including common law)	20	T3	N2a	M0	Alive or dead due to cancer	Alive or dead of other cause	Yes	One primary only	Insured	Male
2012	187	Unknown	Not a paired site	8263/3: Adenocarcinoma in tubulovillous adenoma	0	0	30	None/Unknown	No/Unknown	No radiation and/or cancer-directed surgery	999	0	98	42	Alive	54	White	Married (including common law)	10	Tis	N0	M0	Alive or dead due to cancer	Alive or dead of other cause	Yes	One primary only	Insured	Male
2012	182	Unknown	Not a paired site	8210/3: Adenocarcinoma in adenomatous polyp	IV	IVB	0	None/Unknown	Yes	No radiation and/or cancer-directed surgery	80	0	98	9	Dead	64	White	Married (including common law)	20	TX	N1NOS	M1b	Alive or dead due to cancer	Dead (attributable to this cancer dx)	Yes	One primary only	Insured	Male
2012	209	Unknown	Not a paired site	8140/3: Adenocarcinoma, NOS	IIA	IIA	0	Beam radiation	Yes	No radiation and/or cancer-directed surgery	70	0	98	39	Alive	65	Black	Married (including common law)	20	T3	N0	M0	N/A not first tumor	N/A not first tumor	Yes	2nd of 2 or more primaries	Insured	Male
2012	184	Well differentiated; Grade I	Not a paired site	8140/3: Adenocarcinoma, NOS	IIIB	IIIB	40	None/Unknown	Yes	No radiation and/or cancer-directed surgery	42	23	1	40	Alive	64	White	Divorced	20	T3	N1a	M0	Alive or dead due to cancer	Alive or dead of other cause	Yes	One primary only	Insured	Female
2012	187	Unknown	Not a paired site	8140/3: Adenocarcinoma, NOS	IV	IVB	0	None/Unknown	Yes	No radiation and/or cancer-directed surgery	144	0	98	29	Dead	56	White	Single (never married)	20	T4b	NX	M1b	Alive or dead due to cancer	Dead (attributable to this cancer dx)	Yes	One primary only	Insured	Female
2012	186	Poorly differentiated; Grade III	Not a paired site	8263/3: Adenocarcinoma in tubulovillous adenoma	IV	IVNOS	0	None/Unknown	Yes	No radiation and/or cancer-directed surgery	999	0	98	30	Dead	72	White	Married (including common law)	10	T4b	N0	M1NOS	Alive or dead due to cancer	Dead (attributable to this cancer dx)	Yes	One primary only	Insured	Female
2012	187	Moderately differentiated; Grade II	Not a paired site	8140/3: Adenocarcinoma, NOS	IV	IVA	0	None/Unknown	Yes	No radiation and/or cancer-directed surgery	30	0	98	44	Dead	65	White	Widowed	20	T3	N1NOS	M1a	Alive or dead due to cancer	Dead (attributable to this cancer dx)	Yes	One primary only	Insured	Female
2012	209	Unknown	Not a paired site	8140/3: Adenocarcinoma, NOS	IV	IVA	0	None/Unknown	Yes	No radiation and/or cancer-directed surgery	90	0	98	9	Dead	61	White	Married (including common law)	10	T4a	N1b	M1a	Alive or dead due to cancer	Dead (attributable to this cancer dx)	Yes	One primary only	Any Medicaid	Female
2012	187	Poorly differentiated; Grade III	Not a paired site	8140/3: Adenocarcinoma, NOS	IV	IVA	30	None/Unknown	Yes	No radiation and/or cancer-directed surgery	65	19	10	40	Alive	38	White	Unknown	20	T4a	N2b	M1a	Alive or dead due to cancer	Alive or dead of other cause	Yes	One primary only	Insurance status unknown	Female
2012	180	Moderately differentiated; Grade II	Not a paired site	8140/3: Adenocarcinoma, NOS	IV	IVA	40	None/Unknown	Yes	No radiation and/or cancer-directed surgery	50	16	1	29	Dead	62	White	Divorced	20	T3	N1a	M1a	Alive or dead due to cancer	Dead (attributable to this cancer dx)	Yes	One primary only	Uninsured	Male
2012	187	Moderately differentiated; Grade II	Not a paired site	8140/3: Adenocarcinoma, NOS	IV	IVA	0	None/Unknown	Yes	No radiation and/or cancer-directed surgery	999	0	98	39	Alive	50	White	Single (never married)	20	T3	N2b	M1a	Alive or dead due to cancer	Alive or dead of other cause	Yes	One primary only	Uninsured	Male
2012	183	Moderately differentiated; Grade II	Not a paired site	8140/3: Adenocarcinoma, NOS	IIA	IIA	40	None/Unknown	No/Unknown	No radiation and/or cancer-directed surgery	43	22	0	38	Alive	90	White	Widowed	10	T3	N0	M0	Alive or dead due to cancer	Alive or dead of other cause	Yes	One primary only	Insured/No specifics	Male
2012	187	Unknown	Not a paired site	8140/3: Adenocarcinoma, NOS	I	I	30	None/Unknown	Yes	No radiation and/or cancer-directed surgery	999	5	0	44	Alive	67	White	Divorced	20	T1	N0	M0	Alive or dead due to cancer	Alive or dead of other cause	Yes	One primary only	Insured/No specifics	Male
2012	180	Moderately differentiated; Grade II	Not a paired site	8140/3: Adenocarcinoma, NOS	IIIC	IIIC	40	None/Unknown	Yes	No radiation and/or cancer-directed surgery	50	45	9	45	Alive	50	White	Single (never married)	10	T3	N2b	M0	Alive or dead due to cancer	Alive or dead of other cause	Yes	One primary only	Insured	Female
2012	209	Poorly differentiated; Grade III	Not a paired site	8140/3: Adenocarcinoma, NOS	IIIB	IIIB	30	Beam radiation	Yes	Radiation prior to surgery	50	11	3	46	Alive	61	White	Married (including common law)	20	T3	N1b	M0	Alive or dead due to cancer	Alive or dead of other cause	Yes	One primary only	Insured	Male
2012	184	Moderately differentiated; Grade II	Not a paired site	8480/3: Mucinous adenocarcinoma	IIA	IIA	30	None/Unknown	No/Unknown	No radiation and/or cancer-directed surgery	89	16	0	41	Alive	83	White	Married (including common law)	20	T3	N0	M0	Alive or dead due to cancer	Alive or dead of other cause	Yes	One primary only	Insured	Male
2012	187	Moderately differentiated; Grade II	Not a paired site	8263/3: Adenocarcinoma in tubulovillous adenoma	I	I	30	None/Unknown	No/Unknown	No radiation and/or cancer-directed surgery	30	15	0	40	Alive	85	White	Widowed	20	T2	N0	M0	Alive or dead due to cancer	Alive or dead of other cause	Yes	One primary only	Insured	Female
2012	187	Moderately differentiated; Grade II	Not a paired site	8140/3: Adenocarcinoma, NOS	IV	IVA	0	None/Unknown	Yes	No radiation and/or cancer-directed surgery	999	0	98	36	Dead	84	White	Widowed	20	T4b	N0	M1a	Alive or dead due to cancer	Dead (attributable to this cancer dx)	Yes	One primary only	Insured	Female
2012	187	Moderately differentiated; Grade II	Not a paired site	8140/3: Adenocarcinoma, NOS	IIA	IIA	30	None/Unknown	No/Unknown	No radiation and/or cancer-directed surgery	60	18	0	44	Alive	91	White	Widowed	20	T3	N0	M0	Alive or dead due to cancer	Alive or dead of other cause	Yes	One primary only	Insured/No specifics	Female
2012	199	Moderately differentiated; Grade II	Not a paired site	8140/3: Adenocarcinoma, NOS	I	I	30	None/Unknown	No/Unknown	No radiation and/or cancer-directed surgery	999	15	0	38	Alive	64	White	Married (including common law)	20	T2	N0	M0	Alive or dead due to cancer	Alive or dead of other cause	Yes	One primary only	Insured	Male
2012	209	Poorly differentiated; Grade III	Not a paired site	8490/3: Signet ring cell carcinoma	IIIC	IIIB	30	Beam radiation	Yes	Radiation prior to surgery	60	30	4	16	Alive	41	White	Single (never married)	20	T3	N2a	M0	Alive or dead due to cancer	Alive or dead of other cause	Yes	One primary only	Uninsured	Male
2012	209	Moderately differentiated; Grade II	Not a paired site	8140/3: Adenocarcinoma, NOS	IIA	IIA	30	Beam radiation	Yes	Radiation prior to surgery	40	11	0	47	Alive	68	White	Unknown	10	T3	N0	M0	Alive or dead due to cancer	Alive or dead of other cause	Yes	One primary only	Insured	Male
2012	209	Moderately differentiated; Grade II	Not a paired site	8140/3: Adenocarcinoma, NOS	IIA	IIA	0	Beam radiation	Yes	No radiation and/or cancer-directed surgery	999	0	98	46	Alive	51	White	Separated	20	T3	N0	M0	Alive or dead due to cancer	Alive or dead of other cause	Yes	One primary only	Insured	Male
2012	182	Poorly differentiated; Grade III	Not a paired site	8480/3: Mucinous adenocarcinoma	IIA	IIA	40	None/Unknown	Yes	No radiation and/or cancer-directed surgery	85	12	0	40	Alive	55	White	Married (including common law)	20	T3	N0	M0	Alive or dead due to cancer	Alive or dead of other cause	Yes	One primary only	Insured	Male
2012	187	Moderately differentiated; Grade II	Not a paired site	8140/3: Adenocarcinoma, NOS	IV	IVA	0	None/Unknown	Yes	No radiation and/or cancer-directed surgery	999	0	98	13	Dead	79	Black	Widowed	10	TX	N0	M1a	Alive or dead due to cancer	Dead (attributable to this cancer dx)	Yes	One primary only	Insured/No specifics	Male
2012	180	Moderately differentiated; Grade II	Not a paired site	8140/3: Adenocarcinoma, NOS	IIB	IIB	40	Recommended, unknown if administered	Yes	No radiation and/or cancer-directed surgery	55	25	0	36	Alive	58	White	Single (never married)	20	T4a	N0	M0	Alive or dead due to cancer	Alive or dead of other cause	Yes	One primary only	Insurance status unknown	Female
2012	199	Poorly differentiated; Grade III	Not a paired site	8480/3: Mucinous adenocarcinoma	IIA	IIA	51	None/Unknown	No/Unknown	No radiation and/or cancer-directed surgery	70	19	0	47	Alive	65	White	Married (including common law)	20	T3	N0	M0	Alive or dead due to cancer	Alive or dead of other cause	Yes	One primary only	Insured/No specifics	Male
2012	182	Moderately differentiated; Grade II	Not a paired site	8140/3: Adenocarcinoma, NOS	I	I	40	None/Unknown	No/Unknown	No radiation and/or cancer-directed surgery	26	19	0	40	Alive	74	White	Married (including common law)	20	T2	N0	M0	Alive or dead due to cancer	Alive or dead of other cause	Yes	One primary only	Insurance status unknown	Male
2012	184	Poorly differentiated; Grade III	Not a paired site	8480/3: Mucinous adenocarcinoma	IV	IVA	40	None/Unknown	Yes	No radiation and/or cancer-directed surgery	40	32	3	21	Dead	61	White	Single (never married)	10	T4a	N1b	M1a	Alive or dead due to cancer	Dead (attributable to this cancer dx)	Yes	One primary only	Insured	Male
2012	199	Moderately differentiated; Grade II	Not a paired site	8140/3: Adenocarcinoma, NOS	IV	IVB	0	None/Unknown	Yes	No radiation and/or cancer-directed surgery	999	0	98	8	Dead	73	White	Married (including common law)	10	TX	N1NOS	M1b	Alive or dead due to cancer	Dead (attributable to this cancer dx)	Yes	One primary only	Insured	Male
2012	180	Poorly differentiated; Grade III	Not a paired site	8140/3: Adenocarcinoma, NOS	IIB	IIC	40	None/Unknown	No/Unknown	No radiation and/or cancer-directed surgery	90	18	0	34	Alive	69	White	Married (including common law)	20	T4b	N0	M0	Alive or dead due to cancer	Alive or dead of other cause	Yes	One primary only	Insurance status unknown	Female
2012	182	Well differentiated; Grade I	Right - origin of primary	8140/3: Adenocarcinoma, NOS	I	I	40	None/Unknown	No/Unknown	No radiation and/or cancer-directed surgery	10	14	0	40	Alive	68	Black	Single (never married)	20	T1	N0	M0	Alive or dead due to cancer	Alive or dead of other cause	Yes	One primary only	Insured/No specifics	Female
2012	184	Moderately differentiated; Grade II	Not a paired site	8480/3: Mucinous adenocarcinoma	IIIB	IIIB	30	None/Unknown	No/Unknown	No radiation and/or cancer-directed surgery	80	9	1	46	Alive	88	White	Married (including common law)	10	T3	N1a	M0	Alive or dead due to cancer	Alive or dead of other cause	Yes	One primary only	Insured	Male
2012	187	Unknown	Not a paired site	8140/3: Adenocarcinoma, NOS	IV	IVB	30	None/Unknown	Yes	No radiation and/or cancer-directed surgery	999	40	8	33	Dead	52	White	Married (including common law)	20	T3	N2b	M1b	Alive or dead due to cancer	Dead (attributable to this cancer dx)	Yes	One primary only	Any Medicaid	Male
2012	180	Moderately differentiated; Grade II	Not a paired site	8140/3: Adenocarcinoma, NOS	IV	IVB	0	None/Unknown	Yes	No radiation and/or cancer-directed surgery	999	0	98	8	Dead	84	White	Widowed	20	TX	N1NOS	M1b	Alive or dead due to cancer	Dead (attributable to this cancer dx)	Yes	One primary only	Insured	Female
2012	187	Moderately differentiated; Grade II	Not a paired site	8140/3: Adenocarcinoma, NOS	IIA	IIA	30	None/Unknown	No/Unknown	No radiation and/or cancer-directed surgery	53	13	0	37	Alive	74	White	Married (including common law)	20	T3	N0	M0	Alive or dead due to cancer	Alive or dead of other cause	Yes	One primary only	Insured	Female
2012	199	Moderately differentiated; Grade II	Not a paired site	8140/3: Adenocarcinoma, NOS	IV	IVB	0	None/Unknown	Yes	No radiation and/or cancer-directed surgery	999	0	98	37	Dead	51	White	Married (including common law)	20	T2	N0	M1b	Alive or dead due to cancer	Dead (attributable to this cancer dx)	Yes	One primary only	Insured/No specifics	Female
2012	186	Well differentiated; Grade I	Not a paired site	8263/3: Adenocarcinoma in tubulovillous adenoma	I	I	30	None/Unknown	No/Unknown	No radiation and/or cancer-directed surgery	30	21	0	41	Alive	78	White	Married (including common law)	20	T1	N0	M0	Alive or dead due to cancer	Alive or dead of other cause	Yes	One primary only	Insured	Female
2012	180	Moderately differentiated; Grade II	Not a paired site	8140/3: Adenocarcinoma, NOS	I	I	40	None/Unknown	No/Unknown	No radiation and/or cancer-directed surgery	15	26	0	41	Alive	68	White	Married (including common law)	20	T2	N0	M0	Alive or dead due to cancer	Alive or dead of other cause	Yes	One primary only	Insured	Female
2012	199	Moderately differentiated; Grade II	Not a paired site	8140/3: Adenocarcinoma, NOS	I	I	30	None/Unknown	No/Unknown	No radiation and/or cancer-directed surgery	33	14	0	41	Alive	76	White	Married (including common law)	20	T2	N0	M0	Alive or dead due to cancer	Alive or dead of other cause	Yes	One primary only	Insured	Male
2012	209	Well differentiated; Grade I	Not a paired site	8140/3: Adenocarcinoma, NOS	I	I	30	None/Unknown	No/Unknown	No radiation and/or cancer-directed surgery	22	13	0	28	Alive	56	White	Married (including common law)	20	T1	N0	M0	Alive or dead due to cancer	Alive or dead of other cause	Yes	One primary only	Insured	Female
2012	209	Poorly differentiated; Grade III	Not a paired site	8140/3: Adenocarcinoma, NOS	IIIC	IIIC	50	Beam radiation	Yes	Radiation prior to surgery	50	12	7	20	Dead	53	White	Married (including common law)	20	T3	N2b	M0	Alive or dead due to cancer	Dead (attributable to this cancer dx)	Yes	One primary only	Insured	Male
2012	183	Well differentiated; Grade I	Not a paired site	8263/3: Adenocarcinoma in tubulovillous adenoma	IIA	IIA	40	None/Unknown	No/Unknown	No radiation and/or cancer-directed surgery	1	20	0	36	Alive	78	White	Married (including common law)	20	T3	N0	M0	Alive or dead due to cancer	Alive or dead of other cause	Yes	One primary only	Insurance status unknown	Male
2012	199	Well differentiated; Grade I	Not a paired site	8210/3: Adenocarcinoma in adenomatous polyp	I	I	30	None/Unknown	No/Unknown	No radiation and/or cancer-directed surgery	6	16	0	36	Alive	50	White	Married (including common law)	20	T1	N0	M0	Alive or dead due to cancer	Alive or dead of other cause	Yes	One primary only	Insurance status unknown	Female
2012	180	Poorly differentiated; Grade III	Not a paired site	8140/3: Adenocarcinoma, NOS	IV	IVB	40	None/Unknown	Yes	No radiation and/or cancer-directed surgery	40	22	6	14	Dead	50	White	Single (never married)	10	T3	N2a	M1b	Alive or dead due to cancer	Dead (attributable to this cancer dx)	Yes	One primary only	Insured	Female
2012	187	Moderately differentiated; Grade II	Not a paired site	8140/3: Adenocarcinoma, NOS	IIIB	IIIB	30	None/Unknown	Yes	No radiation and/or cancer-directed surgery	38	29	2	38	Alive	50	White	Married (including common law)	20	T3	N1b	M0	Alive or dead due to cancer	Alive or dead of other cause	Yes	One primary only	Insured	Female
2012	183	Poorly differentiated; Grade III	Not a paired site	8140/3: Adenocarcinoma, NOS	IIIB	IIIC	40	None/Unknown	No/Unknown	No radiation and/or cancer-directed surgery	35	15	3	18	Dead	83	White	Widowed	20	T4b	N1b	M0	Alive or dead due to cancer	Dead (attributable to this cancer dx)	Yes	One primary only	Insured	Female
2012	199	Moderately differentiated; Grade II	Not a paired site	8140/3: Adenocarcinoma, NOS	IIIC	IIIA	30	Beam radiation	Yes	Radiation prior to surgery	18	12	7	36	Alive	53	White	Unknown	20	T2	N1NOS	M0	Alive or dead due to cancer	Alive or dead of other cause	Yes	One primary only	Insured/No specifics	Male
2012	187	Poorly differentiated; Grade III	Not a paired site	8140/3: Adenocarcinoma, NOS	IIIB	IIIB	30	None/Unknown	No/Unknown	No radiation and/or cancer-directed surgery	55	20	1	11	Dead	83	White	Widowed	20	T4a	N1a	M0	Dead (attributable to causes other than this cancer dx)	Alive or dead of other cause	Yes	1st of 2 or more primaries	Insured	Male
2012	180	Poorly differentiated; Grade III	Not a paired site	8263/3: Adenocarcinoma in tubulovillous adenoma	IV	IVA	40	None/Unknown	Yes	No radiation and/or cancer-directed surgery	63	13	0	12	Dead	59	Black	Single (never married)	10	T3	N0	M1a	Alive or dead due to cancer	Dead (attributable to this cancer dx)	Yes	One primary only	Any Medicaid	Female
2012	183	Moderately differentiated; Grade II	Not a paired site	8140/3: Adenocarcinoma, NOS	IV	IVA	40	None/Unknown	Yes	No radiation and/or cancer-directed surgery	28	29	10	19	Dead	43	White	Married (including common law)	20	T4a	N2b	M1a	Alive or dead due to cancer	Dead (attributable to this cancer dx)	Yes	One primary only	Insured	Female
2012	180	Moderately differentiated; Grade II	Not a paired site	8140/3: Adenocarcinoma, NOS	IIIC	IIIC	40	None/Unknown	Yes	No radiation and/or cancer-directed surgery	55	23	15	18	Dead	42	White	Single (never married)	10	T4a	N2b	M0	Alive or dead due to cancer	Dead (attributable to this cancer dx)	Yes	One primary only	Any Medicaid	Male
2012	180	Poorly differentiated; Grade III	Not a paired site	8490/3: Signet ring cell carcinoma	IIIA	IIIA	40	None/Unknown	Yes	No radiation and/or cancer-directed surgery	50	27	3	39	Alive	76	Black	Divorced	20	T2	N1b	M0	Alive or dead due to cancer	Alive or dead of other cause	Yes	One primary only	Insured	Female
2012	187	Poorly differentiated; Grade III	Not a paired site	8140/3: Adenocarcinoma, NOS	IV	IVA	0	None/Unknown	Yes	No radiation and/or cancer-directed surgery	30	0	98	22	Dead	55	White	Separated	10	TX	N1NOS	M1a	Alive or dead due to cancer	Dead (attributable to this cancer dx)	Yes	One primary only	Insured	Male
2012	180	Unknown	Not a paired site	8263/3: Adenocarcinoma in tubulovillous adenoma	IV	IVA	0	None/Unknown	Yes	No radiation and/or cancer-directed surgery	999	0	98	38	Alive	70	White	Married (including common law)	10	TX	N0	M1a	Alive or dead due to cancer	Alive or dead of other cause	Yes	One primary only	Insured	Female
2012	199	Poorly differentiated; Grade III	Not a paired site	8140/3: Adenocarcinoma, NOS	IIIA	IIIA	27	None/Unknown	Yes	No radiation and/or cancer-directed surgery	70	20	2	40	Alive	78	White	Married (including common law)	20	T2	N1b	M0	Alive or dead due to cancer	Alive or dead of other cause	Yes	One primary only	Insured	Male
2012	182	Moderately differentiated; Grade II	Not a paired site	8140/3: Adenocarcinoma, NOS	IV	IVB	0	None/Unknown	Yes	No radiation and/or cancer-directed surgery	76	0	98	16	Dead	56	Black	Single (never married)	20	TX	NX	M1b	Alive or dead due to cancer	Dead (attributable to this cancer dx)	Yes	One primary only	Any Medicaid	Male
2012	187	Poorly differentiated; Grade III	Not a paired site	8140/3: Adenocarcinoma, NOS	IIIB	IIIB	30	None/Unknown	Yes	No radiation and/or cancer-directed surgery	58	22	1	36	Alive	34	White	Married (including common law)	20	T3	N1a	M0	Alive or dead due to cancer	Alive or dead of other cause	Yes	One primary only	Any Medicaid	Male
2012	209	Moderately differentiated; Grade II	Not a paired site	8140/3: Adenocarcinoma, NOS	IV	IVB	0	None/Unknown	Yes	No radiation and/or cancer-directed surgery	50	0	98	11	Dead	56	White	Married (including common law)	10	TX	N1NOS	M1b	Alive or dead due to cancer	Dead (attributable to this cancer dx)	Yes	One primary only	Any Medicaid	Female
2012	180	Poorly differentiated; Grade III	Not a paired site	8140/3: Adenocarcinoma, NOS	IV	IVB	40	None/Unknown	Yes	No radiation and/or cancer-directed surgery	60	40	7	20	Dead	58	White	Widowed	10	T4b	N2b	M1b	Alive or dead due to cancer	Dead (attributable to this cancer dx)	Yes	One primary only	Insured	Male
2012	186	Moderately differentiated; Grade II	Not a paired site	8140/3: Adenocarcinoma, NOS	IIIB	IIIB	40	None/Unknown	Yes	No radiation and/or cancer-directed surgery	62	15	1	37	Alive	49	Black	Married (including common law)	10	T3	N1a	M0	Alive or dead due to cancer	Alive or dead of other cause	Yes	One primary only	Insured	Male
2012	187	Moderately differentiated; Grade II	Not a paired site	8261/3: Adenocarcinoma in villous adenoma	IV	IVB	90	Recommended, unknown if administered	Yes	No radiation and/or cancer-directed surgery	60	11	0	36	Dead	46	White	Single (never married)	10	T4b	N1c	M1b	Dead (missing/unknown COD)	Dead (missing/unknown COD)	Yes	One primary only	Any Medicaid	Female
2012	209	Moderately differentiated; Grade II	Not a paired site	8140/3: Adenocarcinoma, NOS	IIIB	IIIB	50	Beam radiation	Yes	Radiation prior to surgery	30	19	2	38	Alive	62	White	Divorced	20	T3	N1b	M0	Alive or dead due to cancer	Alive or dead of other cause	Yes	One primary only	Any Medicaid	Female
2012	199	Moderately differentiated; Grade II	Not a paired site	8140/3: Adenocarcinoma, NOS	IIIB	IIIB	90	Beam radiation	Yes	Radiation after surgery	22	35	1	36	Alive	51	Unknown	Married (including common law)	20	T3	N1a	M0	Alive or dead due to cancer	Alive or dead of other cause	Yes	One primary only	Any Medicaid	Male
2012	184	Unknown	Not a paired site	8140/3: Adenocarcinoma, NOS	IIIC	IIIC	40	None/Unknown	Yes	No radiation and/or cancer-directed surgery	53	26	13	9	Dead	79	Black	Married (including common law)	20	T4a	N2b	M0	Alive or dead due to cancer	Dead (attributable to this cancer dx)	Yes	One primary only	Insured	Male
2012	180	Moderately differentiated; Grade II	Not a paired site	8480/3: Mucinous adenocarcinoma	IV	IVB	40	None/Unknown	Yes	No radiation and/or cancer-directed surgery	65	41	18	8	Dead	60	White	Married (including common law)	10	T4b	N2b	M1b	Alive or dead due to cancer	Dead (attributable to this cancer dx)	Yes	One primary only	Insured	Female
2012	186	Undifferentiated; anaplastic; Grade IV	Not a paired site	8140/3: Adenocarcinoma, NOS	IIIC	IIIB	40	None/Unknown	Yes	No radiation and/or cancer-directed surgery	40	17	4	4	Alive	37	White	Married (including common law)	10	T3	N2a	M0	Alive or dead due to cancer	Alive or dead of other cause	Yes	One primary only	Uninsured	Female
2012	187	Moderately differentiated; Grade II	Not a paired site	8140/3: Adenocarcinoma, NOS	IIIC	IIIB	30	None/Unknown	Yes	No radiation and/or cancer-directed surgery	50	36	6	39	Alive	56	White	Married (including common law)	10	T3	N2a	M0	Alive or dead due to cancer	Alive or dead of other cause	Yes	One primary only	Insured	Male
2012	209	Moderately differentiated; Grade II	Not a paired site	8140/3: Adenocarcinoma, NOS	IV	IVA	0	None/Unknown	Yes	No radiation and/or cancer-directed surgery	999	0	98	30	Dead	50	White	Single (never married)	20	TX	N0	M1a	Alive or dead due to cancer	Dead (attributable to this cancer dx)	Yes	One primary only	Insured/No specifics	Male
2012	180	Poorly differentiated; Grade III	Not a paired site	8140/3: Adenocarcinoma, NOS	IIA	IIA	30	None/Unknown	No/Unknown	No radiation and/or cancer-directed surgery	100	15	0	17	Dead	87	White	Married (including common law)	20	T3	N0	M0	Alive or dead due to cancer	Dead (attributable to this cancer dx)	Yes	One primary only	Insured	Female
2012	209	Moderately differentiated; Grade II	Not a paired site	8480/3: Mucinous adenocarcinoma	IIIB	IIIB	30	Beam radiation	Yes	Radiation prior to surgery	50	17	1	39	Alive	62	White	Married (including common law)	20	T3	N1a	M0	Alive or dead due to cancer	Alive or dead of other cause	Yes	One primary only	Insured	Female
2012	182	Unknown	Not a paired site	8140/3: Adenocarcinoma, NOS	IV	IVB	0	None/Unknown	Yes	No radiation and/or cancer-directed surgery	60	0	98	35	Dead	72	White	Married (including common law)	20	TX	N1NOS	M1b	Alive or dead due to cancer	Dead (attributable to this cancer dx)	Yes	One primary only	Insured	Female
2012	209	Moderately differentiated; Grade II	Not a paired site	8210/3: Adenocarcinoma in adenomatous polyp	I	I	26	None/Unknown	No/Unknown	No radiation and/or cancer-directed surgery	999	0	98	45	Alive	65	White	Married (including common law)	10	T1	N0	M0	Alive or dead due to cancer	Alive or dead of other cause	Yes	One primary only	Insured/No specifics	Male
2012	180	Poorly differentiated; Grade III	Not a paired site	8140/3: Adenocarcinoma, NOS	IV	IVB	40	None/Unknown	Yes	No radiation and/or cancer-directed surgery	110	24	4	11	Dead	73	White	Married (including common law)	10	T4a	N2a	M1b	Alive or dead due to cancer	Dead (attributable to this cancer dx)	Yes	One primary only	Insured	Female
2012	182	Moderately differentiated; Grade II	Not a paired site	8140/3: Adenocarcinoma, NOS	IV	IVA	0	None/Unknown	Yes	No radiation and/or cancer-directed surgery	999	0	98	13	Dead	78	White	Married (including common law)	20	T4a	N0	M1a	Alive or dead due to cancer	Dead (attributable to this cancer dx)	Yes	One primary only	Insured	Male
2012	187	Poorly differentiated; Grade III	Not a paired site	8140/3: Adenocarcinoma, NOS	IIIB	IIIB	30	None/Unknown	No/Unknown	No radiation and/or cancer-directed surgery	80	20	2	39	Alive	68	White	Married (including common law)	10	T3	N1b	M0	Alive or dead due to cancer	Alive or dead of other cause	Yes	1st of 2 or more primaries	Insured	Male
2012	187	Moderately differentiated; Grade II	Not a paired site	8140/3: Adenocarcinoma, NOS	IV	IVA	30	None/Unknown	No/Unknown	No radiation and/or cancer-directed surgery	95	12	6	26	Dead	45	White	Married (including common law)	20	T3	N2a	M1a	Alive or dead due to cancer	Dead (attributable to this cancer dx)	Yes	One primary only	Insured	Male
2012	209	Moderately differentiated; Grade II	Not a paired site	8140/3: Adenocarcinoma, NOS	IV	IVA	0	None/Unknown	Yes	No radiation and/or cancer-directed surgery	60	0	98	19	Dead	57	White	Married (including common law)	10	TX	N0	M1a	Dead (attributable to causes other than this cancer dx)	Alive or dead of other cause	Yes	One primary only	Any Medicaid	Female
2012	182	Moderately differentiated; Grade II	Not a paired site	8140/3: Adenocarcinoma, NOS	IV	IVB	0	Beam radiation	Yes	No radiation and/or cancer-directed surgery	999	0	98	13	Dead	57	White	Divorced	10	TX	N0	M1b	Alive or dead due to cancer	Dead (attributable to this cancer dx)	Yes	One primary only	Uninsured	Male
2012	209	Poorly differentiated; Grade III	Not a paired site	8140/3: Adenocarcinoma, NOS	IIIC	IIIB	30	Beam radiation	Yes	Radiation prior to surgery	50	19	10	36	Alive	55	White	Single (never married)	20	T3	N1NOS	M0	Alive or dead due to cancer	Alive or dead of other cause	Yes	One primary only	Insured	Female
2012	180	Moderately differentiated; Grade II	Not a paired site	8263/3: Adenocarcinoma in tubulovillous adenoma	IIIA	IIIA	40	None/Unknown	Yes	No radiation and/or cancer-directed surgery	7	21	1	37	Alive	48	White	Married (including common law)	10	T1	N1a	M0	Alive or dead due to cancer	Alive or dead of other cause	Yes	One primary only	Insurance status unknown	Male
2012	180	Poorly differentiated; Grade III	Not a paired site	8140/3: Adenocarcinoma, NOS	IV	IVB	41	None/Unknown	Yes	No radiation and/or cancer-directed surgery	999	21	9	26	Dead	40	Black	Married (including common law)	10	T4b	N2b	M1b	Alive or dead due to cancer	Dead (attributable to this cancer dx)	Yes	One primary only	Insured	Female
2012	188	Poorly differentiated; Grade III	Not a paired site	8490/3: Signet ring cell carcinoma	IIIC	IIIC	40	None/Unknown	No/Unknown	No radiation and/or cancer-directed surgery	80	35	8	9	Dead	89	White	Widowed	10	T3	N2b	M0	Alive or dead due to cancer	Dead (attributable to this cancer dx)	Yes	One primary only	Insured	Male
2012	189	Poorly differentiated; Grade III	Not a paired site	8140/3: Adenocarcinoma, NOS	IIIB	IIIC	30	None/Unknown	Yes	No radiation and/or cancer-directed surgery	999	22	3	42	Alive	47	White	Married (including common law)	20	T4b	N1b	M0	Alive or dead due to cancer	Alive or dead of other cause	Yes	One primary only	Insured/No specifics	Male
2011	189	Unknown	Not a paired site	8140/3: Adenocarcinoma, NOS	IV	IVB	0	None/Unknown	Yes	No radiation and/or cancer-directed surgery	999	99	99	5	Dead	57	Black	Married (including common law)	20	TX	NX	M1b	Alive or dead due to cancer	Dead (attributable to this cancer dx)	Yes	One primary only	Insurance status unknown	Female
2010	180	Moderately differentiated; Grade II	Not a paired site	8481/3: Mucin-producing adenocarcinoma	IIIB	IIIC	41	None/Unknown	Yes	No radiation and/or cancer-directed surgery	130	15	2	37	Dead	66	White	Single (never married)	10	T4b	N1b	M0	N/A not first tumor	N/A not first tumor	Yes	2nd of 2 or more primaries	Insured/No specifics	Female
2010	180	Poorly differentiated; Grade III	Not a paired site	8140/3: Adenocarcinoma, NOS	IV	IVB	40	None/Unknown	Yes	No radiation and/or cancer-directed surgery	65	12	0	12	Dead	60	Black	Single (never married)	20	T4a	N1c	M1b	N/A not first tumor	N/A not first tumor	Yes	2nd of 2 or more primaries	Uninsured	Male
2011	182	Poorly differentiated; Grade III	Not a paired site	8140/3: Adenocarcinoma, NOS	IV	IVB	40	None/Unknown	Yes	No radiation and/or cancer-directed surgery	125	13	1	58	Alive	80	White	Widowed	20	T3	N1a	M1b	N/A not first tumor	N/A not first tumor	Yes	3rd of 3 or more primaries	Insured	Female
2010	188	Moderately differentiated; Grade II	Not a paired site	8210/3: Adenocarcinoma in adenomatous polyp	IV	IVA	40	None/Unknown	Yes	No radiation and/or cancer-directed surgery	30	26	10	30	Dead	65	Black	Widowed	20	T3	N2b	M1a	N/A not first tumor	N/A not first tumor	Yes	2nd of 2 or more primaries	Insured/No specifics	Female
2012	182	Poorly differentiated; Grade III	Not a paired site	8140/3: Adenocarcinoma, NOS	IV	IVA	0	None/Unknown	Yes	No radiation and/or cancer-directed surgery	999	0	98	8	Dead	68	White	Married (including common law)	20	TX	N0	M1a	Alive or dead due to cancer	Dead (attributable to this cancer dx)	Yes	One primary only	Insured	Female
2011	182	Poorly differentiated; Grade III	Not a paired site	8140/3: Adenocarcinoma, NOS	IV	IVA	40	None/Unknown	Yes	No radiation and/or cancer-directed surgery	32	20	0	51	Alive	63	White	Married (including common law)	10	T3	N0	M1a	N/A not first tumor	N/A not first tumor	Yes	2nd of 2 or more primaries	Insured	Male
2010	199	Unknown	Not a paired site	8140/3: Adenocarcinoma, NOS	IV	IVB	0	None/Unknown	Yes	No radiation and/or cancer-directed surgery	50	0	98	11	Dead	84	White	Widowed	20	TX	NX	M1b	N/A not first tumor	N/A not first tumor	Yes	2nd of 2 or more primaries	Insured	Female
2012	187	Moderately differentiated; Grade II	Not a paired site	8140/3: Adenocarcinoma, NOS	IV	IVA	30	None/Unknown	No/Unknown	No radiation and/or cancer-directed surgery	30	12	2	37	Alive	74	Black	Widowed	20	T3	N1b	M1a	N/A not first tumor	N/A not first tumor	Yes	2nd of 2 or more primaries	Insured	Female
2012	182	Poorly differentiated; Grade III	Not a paired site	8140/3: Adenocarcinoma, NOS	IIA	IIA	40	None/Unknown	No/Unknown	No radiation and/or cancer-directed surgery	60	98	0	43	Alive	82	White	Widowed	20	T3	N0	M0	N/A not first tumor	N/A not first tumor	No	3rd of 3 or more primaries	Uninsured	Male
2011	182	Poorly differentiated; Grade III	Not a paired site	8140/3: Adenocarcinoma, NOS	IV	IVB	0	None/Unknown	Yes	No radiation and/or cancer-directed surgery	999	0	98	10	Dead	68	White	Divorced	20	TX	N1NOS	M1b	N/A not first tumor	N/A not first tumor	Yes	2nd of 2 or more primaries	Insured	Female
2011	187	Moderately differentiated; Grade II	Not a paired site	8480/3: Mucinous adenocarcinoma	IV	IVB	32	None/Unknown	Yes	No radiation and/or cancer-directed surgery	50	19	1	33	Dead	64	White	Married (including common law)	10	T4b	N1a	M1b	N/A not first tumor	N/A not first tumor	Yes	2nd of 2 or more primaries	Insured	Female
2011	185	Moderately differentiated; Grade II	Not a paired site	8140/3: Adenocarcinoma, NOS	IV	IVB	0	None/Unknown	Yes	No radiation and/or cancer-directed surgery	999	0	98	5	Dead	63	Black	Widowed	20	T4b	N1NOS	M1b	N/A not first tumor	N/A not first tumor	Yes	2nd of 2 or more primaries	Insured	Female
2011	180	Moderately differentiated; Grade II	Not a paired site	8210/3: Adenocarcinoma in adenomatous polyp	IV	IVB	40	None/Unknown	Yes	No radiation and/or cancer-directed surgery	999	20	7	35	Dead	74	Black	Widowed	20	T3	N2b	M1b	N/A not first tumor	N/A not first tumor	Yes	2nd of 2 or more primaries	Insured/No specifics	Male
2010	184	Moderately differentiated; Grade II	Not a paired site	8140/3: Adenocarcinoma, NOS	IIIC	IIIB	40	None/Unknown	Yes	No radiation and/or cancer-directed surgery	45	17	4	31	Dead	50	Black	Divorced	10	T3	N2a	M0	N/A not first tumor	N/A not first tumor	Yes	2nd of 2 or more primaries	Insured	Female
2011	199	Unknown	Not a paired site	8140/3: Adenocarcinoma, NOS	IV	IVB	0	None/Unknown	Yes	No radiation and/or cancer-directed surgery	999	0	98	10	Dead	87	White	Married (including common law)	20	TX	N0	M1b	N/A not first tumor	N/A not first tumor	Yes	3rd of 3 or more primaries	Insured/No specifics	Male
2011	209	Unknown	Not a paired site	8140/3: Adenocarcinoma, NOS	IV	IVA	0	None/Unknown	Yes	No radiation and/or cancer-directed surgery	999	0	98	26	Dead	86	White	Married (including common law)	20	T2	N0	M1a	N/A not first tumor	N/A not first tumor	Yes	2nd of 2 or more primaries	Insured	Male
2010	184	Undifferentiated; anaplastic; Grade IV	Not a paired site	8480/3: Mucinous adenocarcinoma	IIIB	IIIB	40	None/Unknown	Yes	No radiation and/or cancer-directed surgery	40	11	0	61	Alive	40	White	Married (including common law)	20	T3	N1c	M0	Alive or dead due to cancer	Alive or dead of other cause	Yes	One primary only	Insured	Female
2010	199	Moderately differentiated; Grade II	Not a paired site	8140/3: Adenocarcinoma, NOS	IV	IVB	30	None/Unknown	Yes	No radiation and/or cancer-directed surgery	55	30	5	23	Dead	73	White	Married (including common law)	20	T3	N2a	M1b	N/A not first tumor	N/A not first tumor	Yes	2nd of 2 or more primaries	Insured	Female
2011	209	Moderately differentiated; Grade II	Not a paired site	8140/3: Adenocarcinoma, NOS	IV	IVA	70	None/Unknown	No/Unknown	No radiation and/or cancer-directed surgery	15	9	0	16	Dead	66	White	Married (including common law)	20	T4b	N0	M1a	N/A not first tumor	N/A not first tumor	No	3rd of 3 or more primaries	Insured	Female
2011	209	Moderately differentiated; Grade II	Not a paired site	8140/3: Adenocarcinoma, NOS	IV	IVB	50	Beam radiation	Yes	Radiation prior to surgery	80	20	2	44	Alive	59	Black	Married (including common law)	10	T4b	N1b	M1b	N/A not first tumor	N/A not first tumor	Yes	2nd of 2 or more primaries	Insured	Female
2011	182	Moderately differentiated; Grade II	Not a paired site	8140/3: Adenocarcinoma, NOS	IV	IVA	0	None/Unknown	Yes	No radiation and/or cancer-directed surgery	999	0	98	15	Dead	88	White	Widowed	20	TX	N0	M1a	N/A not first tumor	N/A not first tumor	Yes	2nd of 2 or more primaries	Insured	Female
2012	180	Poorly differentiated; Grade III	Not a paired site	8210/3: Adenocarcinoma in adenomatous polyp	IIIB	IIIC	40	Beam radiation	No/Unknown	Radiation after surgery	100	25	1	45	Alive	65	Black	Divorced	20	T4b	N1a	M0	N/A not first tumor	N/A not first tumor	Yes	3rd of 3 or more primaries	Insured	Female
2010	189	Unknown	Not a paired site	8480/3: Mucinous adenocarcinoma	IV	IVA	0	None/Unknown	Yes	No radiation and/or cancer-directed surgery	30	0	98	7	Dead	76	White	Married (including common law)	20	T1	N0	M1a	N/A not first tumor	N/A not first tumor	Yes	2nd of 2 or more primaries	Insured/No specifics	Female
2012	187	Unknown	Not a paired site	8140/3: Adenocarcinoma, NOS	IV	IVB	40	None/Unknown	Yes	No radiation and/or cancer-directed surgery	999	7	3	14	Dead	65	White	Single (never married)	20	T3	N1b	M1b	N/A not first tumor	N/A not first tumor	Yes	2nd of 2 or more primaries	Insured	Male
2011	199	Moderately differentiated; Grade II	Not a paired site	8140/3: Adenocarcinoma, NOS	IV	IVA	30	None/Unknown	Yes	No radiation and/or cancer-directed surgery	50	10	1	45	Dead	85	White	Widowed	20	T4a	N1a	M1a	N/A not first tumor	N/A not first tumor	Yes	2nd of 2 or more primaries	Insured	Female
2010	180	Moderately differentiated; Grade II	Not a paired site	8140/3: Adenocarcinoma, NOS	IV	IVA	40	None/Unknown	Yes	No radiation and/or cancer-directed surgery	60	13	6	8	Dead	76	Black	Widowed	20	T3	N2a	M1a	N/A not first tumor	N/A not first tumor	Yes	2nd of 2 or more primaries	Insured	Male
2012	187	Moderately differentiated; Grade II	Not a paired site	8140/3: Adenocarcinoma, NOS	IV	IVA	30	None/Unknown	No/Unknown	No radiation and/or cancer-directed surgery	45	15	7	36	Dead	69	White	Divorced	20	T3	N2b	M1a	N/A not first tumor	N/A not first tumor	Yes	2nd of 2 or more primaries	Insured	Male
2011	187	Unknown	Not a paired site	8140/3: Adenocarcinoma, NOS	IV	IVA	0	None/Unknown	Yes	No radiation and/or cancer-directed surgery	999	0	98	14	Dead	58	White	Divorced	10	TX	N0	M1a	N/A not first tumor	N/A not first tumor	Yes	2nd of 2 or more primaries	Insured	Male
2012	184	Moderately differentiated; Grade II	Not a paired site	8140/3: Adenocarcinoma, NOS	IIA	IIA	32	None/Unknown	Yes	No radiation and/or cancer-directed surgery	78	16	0	41	Alive	78	White	Married (including common law)	20	T3	N0	M0	N/A not first tumor	N/A not first tumor	Yes	2nd of 2 or more primaries	Insured	Female
2012	189	Unknown	Not a paired site	8140/3: Adenocarcinoma, NOS	IV	IVB	0	None/Unknown	No/Unknown	No radiation and/or cancer-directed surgery	999	0	98	4	Dead	80	Black	Married (including common law)	10	TX	NX	M1b	N/A not first tumor	N/A not first tumor	Yes	2nd of 2 or more primaries	Insured	Male
2011	182	Moderately differentiated; Grade II	Not a paired site	8140/3: Adenocarcinoma, NOS	IV	IVB	0	None/Unknown	Yes	No radiation and/or cancer-directed surgery	999	0	98	20	Dead	66	White	Married (including common law)	20	T1	N1NOS	M1b	N/A not first tumor	N/A not first tumor	Yes	2nd of 2 or more primaries	Insured	Male
2011	188	Poorly differentiated; Grade III	Not a paired site	8480/3: Mucinous adenocarcinoma	IV	IVB	30	None/Unknown	No/Unknown	No radiation and/or cancer-directed surgery	80	16	16	4	Dead	57	White	Married (including common law)	20	T3	N2b	M1b	N/A not first tumor	N/A not first tumor	Yes	2nd of 2 or more primaries	Insured	Female
2011	209	Moderately differentiated; Grade II	Not a paired site	8140/3: Adenocarcinoma, NOS	IV	IVB	0	Beam radiation	Yes	No radiation and/or cancer-directed surgery	60	0	98	27	Dead	63	Black	Divorced	10	TX	N0	M1b	N/A not first tumor	N/A not first tumor	Yes	2nd of 2 or more primaries	Insured	Female
2010	187	Poorly differentiated; Grade III	Not a paired site	8480/3: Mucinous adenocarcinoma	IV	IVA	30	None/Unknown	Yes	No radiation and/or cancer-directed surgery	29	10	4	14	Dead	80	White	Single (never married)	10	T4a	N2a	M1a	N/A not first tumor	N/A not first tumor	No	4th of 4 or more primaries	Insured	Male
2010	187	Moderately differentiated; Grade II	Not a paired site	8140/3: Adenocarcinoma, NOS	IV	IVB	30	None/Unknown	No/Unknown	No radiation and/or cancer-directed surgery	15	5	0	8	Dead	61	White	Married (including common law)	20	T3	N0	M1b	N/A not first tumor	N/A not first tumor	Yes	2nd of 2 or more primaries	Insured	Female
2011	187	Moderately differentiated; Grade II	Not a paired site	8140/3: Adenocarcinoma, NOS	IIB	IIC	51	None/Unknown	No/Unknown	No radiation and/or cancer-directed surgery	55	5	0	8	Dead	65	Black	Single (never married)	20	T4b	N0	M0	N/A not first tumor	N/A not first tumor	Yes	2nd of 2 or more primaries	Insured/No specifics	Male
2012	188	Moderately differentiated; Grade II	Not a paired site	8480/3: Mucinous adenocarcinoma	IIIC	IIIC	40	None/Unknown	Yes	No radiation and/or cancer-directed surgery	73	19	10	42	Alive	52	White	Married (including common law)	20	T3	N2b	M0	N/A not first tumor	N/A not first tumor	Yes	2nd of 2 or more primaries	Insured	Male
2011	209	Moderately differentiated; Grade II	Not a paired site	8140/3: Adenocarcinoma, NOS	IIIC	IIIC	30	Beam radiation	Yes	Radiation prior to surgery	27	24	13	37	Dead	61	White	Married (including common law)	20	T4b	N2b	M0	N/A not first tumor	N/A not first tumor	Yes	2nd of 2 or more primaries	Insured	Male
2010	188	Moderately differentiated; Grade II	Not a paired site	8140/3: Adenocarcinoma, NOS	IV	IVA	30	None/Unknown	Yes	No radiation and/or cancer-directed surgery	54	10	0	70	Alive	54	White	Married (including common law)	20	T3	N0	M1a	N/A not first tumor	N/A not first tumor	Yes	2nd of 2 or more primaries	Insured	Female
2010	182	Well differentiated; Grade I	Not a paired site	8140/3: Adenocarcinoma, NOS	IV	IVA	40	None/Unknown	Yes	No radiation and/or cancer-directed surgery	120	14	6	31	Dead	62	Black	Single (never married)	20	T3	N2a	M1a	N/A not first tumor	N/A not first tumor	No	3rd of 3 or more primaries	Any Medicaid	Female
2012	187	Moderately differentiated; Grade II	Not a paired site	8140/3: Adenocarcinoma, NOS	IV	IVA	0	None/Unknown	Yes	No radiation and/or cancer-directed surgery	60	0	98	12	Dead	72	Black	Married (including common law)	10	TX	N0	M1a	N/A not first tumor	N/A not first tumor	Yes	2nd of 2 or more primaries	Insured	Male
2010	180	Unknown	Not a paired site	8480/3: Mucinous adenocarcinoma	IV	IVB	0	None/Unknown	Yes	No radiation and/or cancer-directed surgery	999	0	98	21	Dead	68	White	Married (including common law)	10	TX	N0	M1b	N/A not first tumor	N/A not first tumor	No	2nd of 2 or more primaries	Insured	Male
2011	189	Unknown	Not a paired site	8140/3: Adenocarcinoma, NOS	IV	IVB	0	None/Unknown	Yes	No radiation and/or cancer-directed surgery	0	0	98	15	Dead	55	White	Married (including common law)	20	T0	N1NOS	M1b	N/A not first tumor	N/A not first tumor	No	2nd of 2 or more primaries	Insured	Male
2012	183	Poorly differentiated; Grade III	Not a paired site	8480/3: Mucinous adenocarcinoma	IIIC	IIIC	41	None/Unknown	Yes	No radiation and/or cancer-directed surgery	85	16	4	7	Dead	81	White	Married (including common law)	20	T4a	N2a	M0	N/A not first tumor	N/A not first tumor	Yes	2nd of 2 or more primaries	Insured	Male
2010	187	Unknown	Not a paired site	8263/3: Adenocarcinoma in tubulovillous adenoma	IV	IVB	30	None/Unknown	Yes	No radiation and/or cancer-directed surgery	25	0	98	14	Dead	74	White	Widowed	10	T3	N0	M1b	N/A not first tumor	N/A not first tumor	No	2nd of 2 or more primaries	Insured	Female
2012	182	Unknown	Not a paired site	8010/3: Carcinoma, NOS	IV	IVA	0	None/Unknown	Yes	No radiation and/or cancer-directed surgery	100	0	98	15	Dead	72	Black	Married (including common law)	10	TX	N1NOS	M1a	N/A not first tumor	N/A not first tumor	Yes	2nd of 2 or more primaries	Insured	Female
2010	199	Moderately differentiated; Grade II	Not a paired site	8140/3: Adenocarcinoma, NOS	IV	IVB	30	None/Unknown	Yes	No radiation and/or cancer-directed surgery	60	25	3	38	Dead	61	White	Married (including common law)	20	T3	N1b	M1b	N/A not first tumor	N/A not first tumor	Yes	2nd of 2 or more primaries	Any Medicaid	Female
2010	183	Moderately differentiated; Grade II	Not a paired site	8140/3: Adenocarcinoma, NOS	IV	IVB	40	None/Unknown	Yes	No radiation and/or cancer-directed surgery	999	16	11	18	Dead	68	Black	Single (never married)	10	T1	N2b	M1b	N/A not first tumor	N/A not first tumor	Yes	2nd of 2 or more primaries	Insured/No specifics	Male
2010	180	Moderately differentiated; Grade II	Not a paired site	8140/3: Adenocarcinoma, NOS	IV	IVB	40	None/Unknown	Yes	No radiation and/or cancer-directed surgery	123	16	11	18	Dead	68	Black	Single (never married)	10	T4a	N2b	M1b	N/A not first tumor	N/A not first tumor	No	3rd of 3 or more primaries	Insured/No specifics	Male
2012	186	Poorly differentiated; Grade III	Not a paired site	8255/3: Adenocarcinoma with mixed subtypes	IV	IVA	70	None/Unknown	No/Unknown	No radiation and/or cancer-directed surgery	65	15	10	18	Dead	64	White	Married (including common law)	20	T4a	N2b	M1a	N/A not first tumor	N/A not first tumor	Yes	2nd of 2 or more primaries	Insured	Female
2011	184	Moderately differentiated; Grade II	Not a paired site	8140/3: Adenocarcinoma, NOS	IV	IVB	0	None/Unknown	Yes	No radiation and/or cancer-directed surgery	61	0	98	17	Dead	77	White	Widowed	10	T2	N1NOS	M1b	N/A not first tumor	N/A not first tumor	No	2nd of 2 or more primaries	Insured/No specifics	Female
2012	187	Moderately differentiated; Grade II	Not a paired site	8481/3: Mucin-producing adenocarcinoma	IIIA	IIIA	30	None/Unknown	No/Unknown	No radiation and/or cancer-directed surgery	32	10	3	36	Alive	75	White	Married (including common law)	20	T2	N1b	M0	N/A not first tumor	N/A not first tumor	Yes	3rd of 3 or more primaries	Insured	Female
2010	187	Unknown	Not a paired site	8140/3: Adenocarcinoma, NOS	IV	IVB	0	None/Unknown	Yes	No radiation and/or cancer-directed surgery	999	0	98	10	Dead	45	Black	Single (never married)	20	TX	NX	M1b	Alive or dead due to cancer	Dead (attributable to this cancer dx)	Yes	One primary only	Insured	Female
2010	209	Moderately differentiated; Grade II	Not a paired site	8140/3: Adenocarcinoma, NOS	IIA	IIA	30	Beam radiation	Yes	Radiation after surgery	45	20	0	46	Dead	50	Black	Single (never married)	20	T3	N0	M0	Alive or dead due to cancer	Dead (attributable to this cancer dx)	Yes	1st of 2 or more primaries	Insured	Female
2011	209	Moderately differentiated; Grade II	Not a paired site	8140/3: Adenocarcinoma, NOS	IIA	IIA	50	None/Unknown	Yes	No radiation and/or cancer-directed surgery	35	5	0	29	Dead	52	Black	Single (never married)	20	T3	N0	M0	N/A not first tumor	N/A not first tumor	No	2nd of 2 or more primaries	Insured/No specifics	Female
2010	185	Well differentiated; Grade I	Not a paired site	8140/3: Adenocarcinoma, NOS	IIA	IIA	40	None/Unknown	No/Unknown	No radiation and/or cancer-directed surgery	53	10	0	30	Dead	76	White	Widowed	20	T3	N0	M0	N/A not first tumor	N/A not first tumor	Yes	2nd of 2 or more primaries	Insured/No specifics	Male
2010	183	Moderately differentiated; Grade II	Not a paired site	8140/3: Adenocarcinoma, NOS	IV	IVB	40	None/Unknown	Yes	No radiation and/or cancer-directed surgery	90	20	1	12	Dead	47	Black	Single (never married)	10	T3	N1a	M1b	Alive or dead due to cancer	Dead (attributable to this cancer dx)	Yes	One primary only	Insured	Female
2010	187	Poorly differentiated; Grade III	Not a paired site	8490/3: Signet ring cell carcinoma	IV	IVB	30	None/Unknown	Yes	No radiation and/or cancer-directed surgery	65	4	2	4	Dead	58	White	Married (including common law)	20	T3	N1b	M1b	N/A not first tumor	N/A not first tumor	Yes	2nd of 2 or more primaries	Insured	Male
2010	209	Unknown	Not a paired site	8140/3: Adenocarcinoma, NOS	IIIB	IIIB	0	Beam radiation	Yes	No radiation and/or cancer-directed surgery	51	0	98	70	Alive	54	White	Single (never married)	20	T3	N1NOS	M0	Alive or dead due to cancer	Alive or dead of other cause	Yes	One primary only	Insured	Male
2010	180	Well differentiated; Grade I	Not a paired site	8140/3: Adenocarcinoma, NOS	IV	IVA	40	None/Unknown	Yes	No radiation and/or cancer-directed surgery	45	26	5	22	Dead	42	White	Married (including common law)	20	T4a	N2a	M1a	Alive or dead due to cancer	Dead (attributable to this cancer dx)	Yes	One primary only	Insured	Male
2012	209	Moderately differentiated; Grade II	Not a paired site	8140/3: Adenocarcinoma, NOS	IV	IVB	0	Beam radiation	Yes	Radiation after surgery	999	0	98	11	Dead	85	White	Married (including common law)	20	T1	N1a	M1b	N/A not first tumor	N/A not first tumor	Yes	2nd of 2 or more primaries	Insured	Female
2010	185	Poorly differentiated; Grade III	Not a paired site	8140/3: Adenocarcinoma, NOS	IIIC	IIIC	30	None/Unknown	Yes	No radiation and/or cancer-directed surgery	33	19	7	71	Alive	65	Black	Married (including common law)	20	T3	N2b	M0	Alive or dead due to cancer	Alive or dead of other cause	Yes	One primary only	Insured	Female
2010	187	Unknown	Not a paired site	8010/3: Carcinoma, NOS	IV	IVA	0	Beam radiation	Yes	No radiation and/or cancer-directed surgery	72	0	98	14	Dead	61	Black	Divorced	20	TX	N1NOS	M1a	N/A not first tumor	N/A not first tumor	Yes	2nd of 2 or more primaries	Uninsured	Female
2010	183	Poorly differentiated; Grade III	Not a paired site	8140/3: Adenocarcinoma, NOS	IIIA	IIIA	40	None/Unknown	Yes	No radiation and/or cancer-directed surgery	20	21	1	68	Alive	55	White	Married (including common law)	20	T2	N1a	M0	Alive or dead due to cancer	Alive or dead of other cause	Yes	One primary only	Insured	Male
2010	182	Moderately differentiated; Grade II	Not a paired site	8480/3: Mucinous adenocarcinoma	IV	IVB	40	None/Unknown	Yes	No radiation and/or cancer-directed surgery	70	36	18	68	Alive	48	Black	Single (never married)	10	T3	N2b	M1b	Alive or dead due to cancer	Alive or dead of other cause	Yes	One primary only	Insured	Female
2010	182	Moderately differentiated; Grade II	Not a paired site	8140/3: Adenocarcinoma, NOS	IIIB	IIIB	40	None/Unknown	No/Unknown	No radiation and/or cancer-directed surgery	15	33	1	67	Dead	80	White	Single (never married)	20	T3	N1a	M0	Dead (attributable to causes other than this cancer dx)	Alive or dead of other cause	Yes	One primary only	Insured	Female
2010	188	Poorly differentiated; Grade III	Not a paired site	8481/3: Mucin-producing adenocarcinoma	IIIC	IIIC	40	None/Unknown	Yes	No radiation and/or cancer-directed surgery	100	30	14	67	Alive	61	White	Married (including common law)	10	T3	N2b	M0	Alive or dead due to cancer	Alive or dead of other cause	Yes	One primary only	Insured	Male
2010	186	Well differentiated; Grade I	Not a paired site	8140/3: Adenocarcinoma, NOS	IV	IVA	41	None/Unknown	Yes	No radiation and/or cancer-directed surgery	60	22	10	36	Dead	28	White	Single (never married)	20	T3	N2b	M1a	Alive or dead due to cancer	Dead (attributable to this cancer dx)	Yes	One primary only	Any Medicaid	Male
2010	182	Moderately differentiated; Grade II	Not a paired site	8263/3: Adenocarcinoma in tubulovillous adenoma	IIIA	IIIA	30	None/Unknown	Yes	No radiation and/or cancer-directed surgery	10	11	2	68	Alive	53	White	Married (including common law)	20	T1	N1b	M0	Alive or dead due to cancer	Alive or dead of other cause	Yes	One primary only	Insured	Female
2010	182	Moderately differentiated; Grade II	Not a paired site	8481/3: Mucin-producing adenocarcinoma	IIIC	IIIB	40	None/Unknown	Yes	No radiation and/or cancer-directed surgery	25	34	4	68	Alive	42	White	Married (including common law)	10	T2	N2a	M0	Alive or dead due to cancer	Alive or dead of other cause	Yes	1st of 2 or more primaries	Insured	Male
2010	182	Moderately differentiated; Grade II	Not a paired site	8140/3: Adenocarcinoma, NOS	IV	IVA	0	Beam radiation	Yes	Radiation after surgery	102	0	98	11	Dead	55	Black	Single (never married)	10	T1	N1NOS	M1a	Dead (attributable to causes other than this cancer dx)	Alive or dead of other cause	Yes	One primary only	Insured	Female
2010	184	Undifferentiated; anaplastic; Grade IV	Not a paired site	8013/3: Large cell neuroendocrine carcinoma	IV	IVA	0	None/Unknown	Yes	No radiation and/or cancer-directed surgery	60	0	98	16	Dead	72	Black	Married (including common law)	10	T4NOS	N0	M1a	Alive or dead due to cancer	Dead (attributable to this cancer dx)	Yes	One primary only	Insured	Male
2010	187	Moderately differentiated; Grade II	Not a paired site	8140/3: Adenocarcinoma, NOS	IIIB	IIIB	30	None/Unknown	No/Unknown	No radiation and/or cancer-directed surgery	29	13	2	31	Alive	92	White	Widowed	20	T3	N1b	M0	Alive or dead due to cancer	Alive or dead of other cause	Yes	One primary only	Insured	Female
2010	182	Moderately differentiated; Grade II	Not a paired site	8480/3: Mucinous adenocarcinoma	IV	IVB	0	None/Unknown	Yes	No radiation and/or cancer-directed surgery	58	0	98	22	Dead	61	Black	Widowed	10	T4b	N1NOS	M1b	Alive or dead due to cancer	Dead (attributable to this cancer dx)	Yes	One primary only	Any Medicaid	Female
2010	180	Unknown	Not a paired site	8261/3: Adenocarcinoma in villous adenoma	IV	IVB	40	None/Unknown	Yes	No radiation and/or cancer-directed surgery	999	13	0	25	Dead	60	White	Married (including common law)	10	T4b	N0	M1b	Alive or dead due to cancer	Dead (attributable to this cancer dx)	Yes	One primary only	Insured	Female
2010	187	Moderately differentiated; Grade II	Not a paired site	8140/3: Adenocarcinoma, NOS	IV	IVA	30	None/Unknown	Yes	No radiation and/or cancer-directed surgery	30	17	0	56	Dead	59	Black	Married (including common law)	20	T3	N0	M1a	Alive or dead due to cancer	Dead (attributable to this cancer dx)	Yes	One primary only	Insured	Female
2010	186	Moderately differentiated; Grade II	Not a paired site	8140/3: Adenocarcinoma, NOS	IV	IVA	30	None/Unknown	Yes	No radiation and/or cancer-directed surgery	60	29	0	66	Alive	68	Black	Divorced	20	T3	N0	M1a	Alive or dead due to cancer	Alive or dead of other cause	Yes	One primary only	Insured	Male
2010	199	Poorly differentiated; Grade III	Not a paired site	8140/3: Adenocarcinoma, NOS	IV	IVA	30	None/Unknown	Yes	No radiation and/or cancer-directed surgery	55	18	2	65	Alive	51	White	Divorced	20	T3	N1b	M1a	Alive or dead due to cancer	Alive or dead of other cause	Yes	One primary only	Insured	Male
2010	187	Poorly differentiated; Grade III	Not a paired site	8263/3: Adenocarcinoma in tubulovillous adenoma	IIIC	IIIC	30	None/Unknown	Yes	No radiation and/or cancer-directed surgery	60	31	9	65	Alive	59	Black	Single (never married)	20	T3	N2b	M0	Alive or dead due to cancer	Alive or dead of other cause	Yes	1st of 2 or more primaries	Insured	Male
2010	187	Moderately differentiated; Grade II	Not a paired site	8140/3: Adenocarcinoma, NOS	IV	IVA	30	None/Unknown	Yes	No radiation and/or cancer-directed surgery	100	18	1	15	Dead	72	Black	Divorced	20	T4a	N1a	M1a	Alive or dead due to cancer	Dead (attributable to this cancer dx)	Yes	One primary only	Insured/No specifics	Female
2010	187	Moderately differentiated; Grade II	Not a paired site	8140/3: Adenocarcinoma, NOS	IV	IVA	30	None/Unknown	Yes	No radiation and/or cancer-directed surgery	45	13	5	32	Dead	55	White	Married (including common law)	20	T3	N2a	M1a	Alive or dead due to cancer	Dead (attributable to this cancer dx)	Yes	One primary only	Insured	Male
2010	199	Moderately differentiated; Grade II	Not a paired site	8140/3: Adenocarcinoma, NOS	IIIC	IIIC	30	Beam radiation	Yes	Radiation after surgery	50	15	7	53	Dead	38	Black	Unknown	10	T4a	N2b	M0	Alive or dead due to cancer	Dead (attributable to this cancer dx)	Yes	One primary only	Insured	Male
2010	180	Unknown	Not a paired site	8263/3: Adenocarcinoma in tubulovillous adenoma	IV	IVB	0	None/Unknown	Yes	No radiation and/or cancer-directed surgery	71	0	98	13	Dead	52	Black	Single (never married)	10	TX	N1NOS	M1b	Alive or dead due to cancer	Dead (attributable to this cancer dx)	Yes	One primary only	Insured	Female
2010	180	Moderately differentiated; Grade II	Not a paired site	8140/3: Adenocarcinoma, NOS	IIA	IIA	40	None/Unknown	No/Unknown	No radiation and/or cancer-directed surgery	70	23	0	65	Alive	85	White	Widowed	20	T3	N0	M0	Alive or dead due to cancer	Alive or dead of other cause	Yes	One primary only	Insured	Female
2010	185	Moderately differentiated; Grade II	Not a paired site	8140/3: Adenocarcinoma, NOS	IV	IVA	30	None/Unknown	Yes	No radiation and/or cancer-directed surgery	50	27	2	20	Dead	39	White	Single (never married)	20	T3	N1b	M1a	Alive or dead due to cancer	Dead (attributable to this cancer dx)	Yes	One primary only	Insured	Male
2010	182	Moderately differentiated; Grade II	Not a paired site	8140/3: Adenocarcinoma, NOS	IV	IVB	0	None/Unknown	Yes	No radiation and/or cancer-directed surgery	999	0	98	59	Dead	53	Black	Divorced	20	T1	NX	M1b	Alive or dead due to cancer	Dead (attributable to this cancer dx)	Yes	One primary only	Insured/No specifics	Female
2010	180	Poorly differentiated; Grade III	Not a paired site	8140/3: Adenocarcinoma, NOS	IV	IVB	0	None/Unknown	Yes	No radiation and/or cancer-directed surgery	50	0	98	9	Dead	43	Black	Single (never married)	20	TX	N0	M1b	Alive or dead due to cancer	Dead (attributable to this cancer dx)	Yes	One primary only	Any Medicaid	Female
2010	199	Unknown	Not a paired site	8140/3: Adenocarcinoma, NOS	IV	IVB	0	None/Unknown	Yes	No radiation and/or cancer-directed surgery	999	0	98	18	Dead	52	Black	Married (including common law)	20	TX	N0	M1b	Alive or dead due to cancer	Dead (attributable to this cancer dx)	Yes	One primary only	Insured	Female
2010	187	Well differentiated; Grade I	Not a paired site	8140/3: Adenocarcinoma, NOS	IV	IVB	70	Beam radiation	Yes	Radiation after surgery	60	14	3	70	Alive	45	White	Single (never married)	20	T4a	N1b	M1b	Alive or dead due to cancer	Alive or dead of other cause	Yes	One primary only	Insured	Female
2010	187	Moderately differentiated; Grade II	Not a paired site	8140/3: Adenocarcinoma, NOS	IV	IVA	30	None/Unknown	Yes	No radiation and/or cancer-directed surgery	60	23	4	69	Alive	46	Black	Married (including common law)	20	T3	N2a	M1a	Alive or dead due to cancer	Alive or dead of other cause	Yes	One primary only	Insured	Female
2010	209	Moderately differentiated; Grade II	Not a paired site	8140/3: Adenocarcinoma, NOS	IIIB	IIIB	30	None/Unknown	Yes	No radiation and/or cancer-directed surgery	45	10	1	53	Dead	82	Black	Divorced	20	T4a	N1a	M0	Dead (attributable to causes other than this cancer dx)	Alive or dead of other cause	Yes	One primary only	Insured/No specifics	Male
2010	186	Moderately differentiated; Grade II	Not a paired site	8140/3: Adenocarcinoma, NOS	IV	IVA	30	None/Unknown	Yes	No radiation and/or cancer-directed surgery	999	27	3	14	Dead	56	White	Married (including common law)	20	T3	N1b	M1a	Dead (attributable to causes other than this cancer dx)	Alive or dead of other cause	Yes	One primary only	Insured	Male
2010	187	Moderately differentiated; Grade II	Not a paired site	8481/3: Mucin-producing adenocarcinoma	IIIB	IIIB	40	None/Unknown	Yes	No radiation and/or cancer-directed surgery	64	28	2	66	Alive	71	White	Widowed	10	T3	N1b	M0	Alive or dead due to cancer	Alive or dead of other cause	Yes	1st of 2 or more primaries	Insured	Male
2010	209	Moderately differentiated; Grade II	Not a paired site	8140/3: Adenocarcinoma, NOS	IV	IVA	30	None/Unknown	Yes	No radiation and/or cancer-directed surgery	50	45	7	67	Alive	58	White	Married (including common law)	20	T3	N2b	M1a	Alive or dead due to cancer	Alive or dead of other cause	Yes	One primary only	Insured	Male
2010	182	Poorly differentiated; Grade III	Not a paired site	8140/3: Adenocarcinoma, NOS	IV	IVA	30	None/Unknown	Yes	No radiation and/or cancer-directed surgery	35	32	1	59	Dead	71	White	Divorced	10	T3	N1a	M1a	Alive or dead due to cancer	Dead (attributable to this cancer dx)	Yes	One primary only	Insured	Female
2010	182	Poorly differentiated; Grade III	Not a paired site	8140/3: Adenocarcinoma, NOS	IV	IVA	0	None/Unknown	Yes	No radiation and/or cancer-directed surgery	999	0	98	6	Dead	79	Black	Widowed	20	TX	NX	M1a	Dead (attributable to causes other than this cancer dx)	Alive or dead of other cause	Yes	One primary only	Insured/No specifics	Male
2010	180	Poorly differentiated; Grade III	Not a paired site	8480/3: Mucinous adenocarcinoma	IV	IVB	40	None/Unknown	Yes	No radiation and/or cancer-directed surgery	31	12	10	8	Dead	63	White	Married (including common law)	10	T4b	N2b	M1b	Alive or dead due to cancer	Dead (attributable to this cancer dx)	Yes	1st of 2 or more primaries	Insured	Male
2010	182	Moderately differentiated; Grade II	Not a paired site	8140/3: Adenocarcinoma, NOS	IIIC	IIIC	40	None/Unknown	Yes	No radiation and/or cancer-directed surgery	55	32	12	27	Dead	58	White	Married (including common law)	20	T4a	N2b	M0	Alive or dead due to cancer	Dead (attributable to this cancer dx)	Yes	One primary only	Insured	Male
2010	209	Moderately differentiated; Grade II	Not a paired site	8140/3: Adenocarcinoma, NOS	IIIC	IIIB	30	Beam radiation	Yes	Radiation after surgery	20	9	5	67	Alive	44	White	Married (including common law)	20	T2	N2a	M0	Alive or dead due to cancer	Alive or dead of other cause	Yes	One primary only	Insured	Male
2010	209	Moderately differentiated; Grade II	Not a paired site	8140/3: Adenocarcinoma, NOS	I	I	50	Beam radiation	Yes	Radiation prior to surgery	50	1	0	15	Dead	80	White	Widowed	10	T2	N0	M0	Dead (attributable to causes other than this cancer dx)	Alive or dead of other cause	Yes	One primary only	Insured	Female
2010	182	Poorly differentiated; Grade III	Not a paired site	8140/3: Adenocarcinoma, NOS	IV	IVA	40	None/Unknown	Yes	No radiation and/or cancer-directed surgery	55	25	11	59	Dead	76	White	Separated	20	T4b	N2b	M1a	Dead (attributable to causes other than this cancer dx)	Alive or dead of other cause	Yes	1st of 2 or more primaries	Insured	Female
2010	187	Moderately differentiated; Grade II	Not a paired site	8140/3: Adenocarcinoma, NOS	IIIC	IIIB	30	None/Unknown	Yes	No radiation and/or cancer-directed surgery	70	19	4	64	Dead	44	White	Single (never married)	20	T2	N2a	M0	Alive or dead due to cancer	Dead (attributable to this cancer dx)	Yes	1st of 2 or more primaries	Insured	Male
2010	209	Moderately differentiated; Grade II	Not a paired site	8140/3: Adenocarcinoma, NOS	IIIC	IIIB	30	Beam radiation	Yes	Radiation after surgery	45	19	4	64	Dead	44	White	Single (never married)	20	T3	N2a	M0	N/A not first tumor	N/A not first tumor	Yes	2nd of 2 or more primaries	Insured	Male
2010	186	Moderately differentiated; Grade II	Not a paired site	8261/3: Adenocarcinoma in villous adenoma	I	I	40	None/Unknown	No/Unknown	No radiation and/or cancer-directed surgery	102	25	0	29	Dead	58	White	Married (including common law)	10	T2	N0	M0	Alive or dead due to cancer	Dead (attributable to this cancer dx)	Yes	One primary only	Insured	Female
2011	199	Undifferentiated; anaplastic; Grade IV	Not a paired site	8480/3: Mucinous adenocarcinoma	I	I	30	Beam radiation	Yes	Radiation after surgery	52	17	0	30	Dead	51	White	Married (including common law)	10	T2	N0	M0	N/A not first tumor	N/A not first tumor	Yes	2nd of 2 or more primaries	Insured	Male
2010	187	Moderately differentiated; Grade II	Not a paired site	8480/3: Mucinous adenocarcinoma	IV	IVB	30	None/Unknown	No/Unknown	No radiation and/or cancer-directed surgery	85	4	3	6	Dead	42	White	Married (including common law)	20	T4a	N1b	M1b	Alive or dead due to cancer	Dead (attributable to this cancer dx)	Yes	One primary only	Insured	Male
2010	209	Moderately differentiated; Grade II	Not a paired site	8140/3: Adenocarcinoma, NOS	IIIB	IIIB	50	Beam radiation	Yes	Radiation after surgery	100	7	0	45	Dead	50	White	Single (never married)	20	T3	N1a	M0	Alive or dead due to cancer	Dead (attributable to this cancer dx)	Yes	One primary only	Any Medicaid	Female
2010	182	Poorly differentiated; Grade III	Not a paired site	8140/3: Adenocarcinoma, NOS	IV	IVA	40	None/Unknown	No/Unknown	No radiation and/or cancer-directed surgery	35	26	3	14	Dead	85	White	Married (including common law)	10	T3	N1b	M1a	Alive or dead due to cancer	Dead (attributable to this cancer dx)	Yes	One primary only	Insured	Male
2010	187	Moderately differentiated; Grade II	Not a paired site	8140/3: Adenocarcinoma, NOS	IV	IVA	30	None/Unknown	Yes	No radiation and/or cancer-directed surgery	70	10	0	18	Dead	72	White	Married (including common law)	20	T3	N0	M1a	Dead (attributable to causes other than this cancer dx)	Alive or dead of other cause	Yes	One primary only	Insured	Male
2010	187	Moderately differentiated; Grade II	Not a paired site	8140/3: Adenocarcinoma, NOS	IV	IVB	30	None/Unknown	Yes	No radiation and/or cancer-directed surgery	65	19	0	14	Dead	74	White	Married (including common law)	20	T3	N0	M1b	Alive or dead due to cancer	Dead (attributable to this cancer dx)	Yes	One primary only	Insured	Male
2010	199	Moderately differentiated; Grade II	Not a paired site	8140/3: Adenocarcinoma, NOS	IIIC	IIIC	30	None/Unknown	No/Unknown	No radiation and/or cancer-directed surgery	35	11	7	27	Dead	76	Black	Widowed	10	T4a	N2b	M0	Alive or dead due to cancer	Dead (attributable to this cancer dx)	Yes	One primary only	Insured	Female
2010	209	Moderately differentiated; Grade II	Not a paired site	8140/3: Adenocarcinoma, NOS	IIIB	IIIB	50	Beam radiation	Yes	Radiation after surgery	50	15	3	36	Dead	57	White	Divorced	20	T3	N1b	M0	Alive or dead due to cancer	Dead (attributable to this cancer dx)	Yes	One primary only	Insured	Male
2010	199	Moderately differentiated; Grade II	Not a paired site	8140/3: Adenocarcinoma, NOS	IIA	IIA	30	Beam radiation	Yes	Radiation prior to surgery	30	8	0	67	Alive	71	White	Divorced	10	T3	N0	M0	Alive or dead due to cancer	Alive or dead of other cause	Yes	One primary only	Insured/No specifics	Female
2010	209	Moderately differentiated; Grade II	Not a paired site	8140/3: Adenocarcinoma, NOS	IIIA	IIIA	0	Beam radiation	Yes	No radiation and/or cancer-directed surgery	30	0	98	61	Alive	50	White	Married (including common law)	20	T2	N1a	M0	Alive or dead due to cancer	Alive or dead of other cause	Yes	One primary only	Insured/No specifics	Male
2010	209	Moderately differentiated; Grade II	Not a paired site	8140/3: Adenocarcinoma, NOS	IIIC	IIIC	50	Beam radiation	Yes	Radiation prior to surgery	80	15	13	63	Alive	66	White	Married (including common law)	20	T3	N2b	M0	Alive or dead due to cancer	Alive or dead of other cause	Yes	One primary only	Insured	Male
2010	185	Moderately differentiated; Grade II	Not a paired site	8480/3: Mucinous adenocarcinoma	IIA	IIA	40	None/Unknown	No/Unknown	No radiation and/or cancer-directed surgery	35	10	0	65	Alive	73	Black	Single (never married)	10	T3	N0	M0	Alive or dead due to cancer	Alive or dead of other cause	Yes	One primary only	Insured	Male
2010	209	Moderately differentiated; Grade II	Not a paired site	8140/3: Adenocarcinoma, NOS	I	I	30	None/Unknown	No/Unknown	No radiation and/or cancer-directed surgery	45	18	0	65	Alive	74	White	Married (including common law)	20	T2	N0	M0	Alive or dead due to cancer	Alive or dead of other cause	Yes	One primary only	Insured	Female
2010	182	Moderately differentiated; Grade II	Not a paired site	8140/3: Adenocarcinoma, NOS	IIA	IIA	40	None/Unknown	Yes	No radiation and/or cancer-directed surgery	54	17	0	67	Alive	49	Black	Divorced	10	T3	N0	M0	Alive or dead due to cancer	Alive or dead of other cause	Yes	One primary only	Insured	Female
2010	187	Moderately differentiated; Grade II	Not a paired site	8140/3: Adenocarcinoma, NOS	IV	IVB	0	Beam radiation	Yes	Radiation after surgery	40	0	98	30	Dead	53	White	Married (including common law)	10	TX	N0	M1b	Alive or dead due to cancer	Dead (attributable to this cancer dx)	Yes	One primary only	Any Medicaid	Female
2010	209	Moderately differentiated; Grade II	Not a paired site	8140/3: Adenocarcinoma, NOS	IV	IVA	30	Beam radiation	Yes	Radiation prior to surgery	5	9	0	66	Alive	67	White	Married (including common law)	20	T2	N0	M1a	Alive or dead due to cancer	Alive or dead of other cause	Yes	One primary only	Insured	Female
2010	183	Unknown	Not a paired site	8140/3: Adenocarcinoma, NOS	IV	IVA	0	None/Unknown	Yes	No radiation and/or cancer-directed surgery	50	0	98	19	Dead	31	Black	Married (including common law)	10	TX	NX	M1a	Alive or dead due to cancer	Dead (attributable to this cancer dx)	Yes	One primary only	Insured	Female
2011	189	Unknown	Not a paired site	8480/3: Mucinous adenocarcinoma	IV	IVA	0	None/Unknown	No/Unknown	No radiation and/or cancer-directed surgery	0	0	98	18	Dead	64	Black	Married (including common law)	10	T0	N0	M1a	N/A not first tumor	N/A not first tumor	No	3rd of 3 or more primaries	Insured	Female
2010	188	Poorly differentiated; Grade III	Not a paired site	8140/3: Adenocarcinoma, NOS	IV	IVA	40	None/Unknown	Yes	No radiation and/or cancer-directed surgery	60	24	8	7	Dead	90	Black	Widowed	10	T4a	N2b	M1a	Alive or dead due to cancer	Dead (attributable to this cancer dx)	Yes	One primary only	Insured	Male
2010	187	Poorly differentiated; Grade III	Not a paired site	8140/3: Adenocarcinoma, NOS	IV	IVA	0	None/Unknown	Yes	No radiation and/or cancer-directed surgery	999	0	98	8	Dead	70	White	Widowed	10	TX	N0	M1a	Alive or dead due to cancer	Dead (attributable to this cancer dx)	Yes	One primary only	Insured/No specifics	Male
2010	209	Moderately differentiated; Grade II	Not a paired site	8140/3: Adenocarcinoma, NOS	IV	IVNOS	0	Beam radiation	Yes	No radiation and/or cancer-directed surgery	44	0	98	39	Dead	60	White	Married (including common law)	20	T3	N1NOS	M1NOS	Alive or dead due to cancer	Dead (attributable to this cancer dx)	Yes	One primary only	Insured	Male
2010	182	Moderately differentiated; Grade II	Not a paired site	8140/3: Adenocarcinoma, NOS	IV	IVB	40	None/Unknown	Yes	No radiation and/or cancer-directed surgery	40	20	2	17	Dead	51	White	Married (including common law)	10	T3	N1b	M1b	Alive or dead due to cancer	Dead (attributable to this cancer dx)	Yes	One primary only	Insured	Female
2010	209	Unknown	Not a paired site	8140/3: Adenocarcinoma, NOS	IV	IVA	0	None/Unknown	Yes	No radiation and/or cancer-directed surgery	999	0	98	20	Dead	47	White	Married (including common law)	20	TX	N1NOS	M1a	Alive or dead due to cancer	Dead (attributable to this cancer dx)	Yes	One primary only	Insured	Male
2010	186	Unknown	Not a paired site	8140/3: Adenocarcinoma, NOS	IV	IVB	0	Beam radiation	Yes	No radiation and/or cancer-directed surgery	999	0	98	18	Dead	54	Black	Single (never married)	20	TX	N0	M1b	Alive or dead due to cancer	Dead (attributable to this cancer dx)	Yes	One primary only	Insured	Male
2010	180	Moderately differentiated; Grade II	Not a paired site	8210/3: Adenocarcinoma in adenomatous polyp	IIA	IIA	40	None/Unknown	No/Unknown	No radiation and/or cancer-directed surgery	50	14	0	70	Alive	51	White	Single (never married)	10	T3	N0	M0	Alive or dead due to cancer	Alive or dead of other cause	Yes	One primary only	Any Medicaid	Male
2010	187	Unknown	Not a paired site	8140/3: Adenocarcinoma, NOS	IV	IVA	0	None/Unknown	No/Unknown	No radiation and/or cancer-directed surgery	999	0	98	61	Alive	53	White	Married (including common law)	20	T1	N0	M1a	Alive or dead due to cancer	Alive or dead of other cause	Yes	One primary only	Insured	Male
2010	187	Poorly differentiated; Grade III	Not a paired site	8140/3: Adenocarcinoma, NOS	IV	IVA	30	None/Unknown	Yes	No radiation and/or cancer-directed surgery	55	17	8	13	Dead	61	Black	Divorced	10	T3	N2b	M1a	Alive or dead due to cancer	Dead (attributable to this cancer dx)	Yes	One primary only	Insured	Male
2010	209	Moderately differentiated; Grade II	Not a paired site	8140/3: Adenocarcinoma, NOS	IV	IVA	50	None/Unknown	Yes	No radiation and/or cancer-directed surgery	40	42	5	15	Dead	80	Black	Widowed	10	T4b	N2a	M1a	Alive or dead due to cancer	Dead (attributable to this cancer dx)	Yes	1st of 2 or more primaries	Insured	Male
2010	187	Unknown	Not a paired site	8140/3: Adenocarcinoma, NOS	IV	IVA	0	None/Unknown	No/Unknown	No radiation and/or cancer-directed surgery	999	0	98	8	Dead	76	White	Married (including common law)	20	TX	NX	M1a	Alive or dead due to cancer	Dead (attributable to this cancer dx)	Yes	One primary only	Insured	Male
2010	189	Unknown	Not a paired site	8140/3: Adenocarcinoma, NOS	IV	IVA	90	None/Unknown	Yes	No radiation and/or cancer-directed surgery	999	0	98	29	Dead	56	White	Unknown	10	TX	NX	M1a	Alive or dead due to cancer	Dead (attributable to this cancer dx)	Yes	One primary only	Any Medicaid	Female
2010	187	Moderately differentiated; Grade II	Not a paired site	8140/3: Adenocarcinoma, NOS	IIIB	IIIB	30	None/Unknown	No/Unknown	No radiation and/or cancer-directed surgery	35	16	3	60	Alive	42	Black	Single (never married)	20	T3	N1b	M0	Alive or dead due to cancer	Alive or dead of other cause	Yes	One primary only	Insured	Female
2010	183	Moderately differentiated; Grade II	Not a paired site	8140/3: Adenocarcinoma, NOS	IIA	IIA	40	None/Unknown	No/Unknown	No radiation and/or cancer-directed surgery	25	21	0	63	Alive	70	White	Widowed	10	T3	N0	M0	Alive or dead due to cancer	Alive or dead of other cause	Yes	1st of 2 or more primaries	Insured	Female
2010	188	Moderately differentiated; Grade II	Not a paired site	8480/3: Mucinous adenocarcinoma	IIA	IIA	40	None/Unknown	No/Unknown	No radiation and/or cancer-directed surgery	55	24	0	62	Alive	80	Black	Single (never married)	20	T3	N0	M0	Alive or dead due to cancer	Alive or dead of other cause	Yes	One primary only	Insured/No specifics	Male
2010	199	Moderately differentiated; Grade II	Not a paired site	8140/3: Adenocarcinoma, NOS	IV	IVB	0	None/Unknown	Yes	No radiation and/or cancer-directed surgery	999	0	98	10	Dead	39	White	Married (including common law)	20	TX	N0	M1b	Alive or dead due to cancer	Dead (attributable to this cancer dx)	Yes	One primary only	Insured	Male
2010	209	Moderately differentiated; Grade II	Not a paired site	8140/3: Adenocarcinoma, NOS	IIIB	IIIB	30	Beam radiation	Yes	Radiation after surgery	40	51	1	63	Alive	44	White	Single (never married)	10	T3	N1a	M0	Alive or dead due to cancer	Alive or dead of other cause	Yes	One primary only	Insured/No specifics	Male
2011	199	Unknown	Not a paired site	8140/3: Adenocarcinoma, NOS	IV	IVA	0	Beam radiation	Yes	No radiation and/or cancer-directed surgery	42	0	98	9	Dead	54	White	Single (never married)	10	T1	N0	M1a	Alive or dead due to cancer	Dead (attributable to this cancer dx)	Yes	One primary only	Insured	Male
2010	188	Poorly differentiated; Grade III	Not a paired site	8490/3: Signet ring cell carcinoma	IV	IVB	30	None/Unknown	No/Unknown	No radiation and/or cancer-directed surgery	120	11	3	6	Dead	54	White	Married (including common law)	10	T4b	N1b	M1b	Alive or dead due to cancer	Dead (attributable to this cancer dx)	Yes	One primary only	Insured/No specifics	Male
2011	180	Moderately differentiated; Grade II	Not a paired site	8210/3: Adenocarcinoma in adenomatous polyp	IV	IVB	0	None/Unknown	Yes	No radiation and/or cancer-directed surgery	50	0	98	23	Dead	62	White	Married (including common law)	10	T3	N1NOS	M1b	Alive or dead due to cancer	Dead (attributable to this cancer dx)	Yes	One primary only	Insured	Male
2011	186	Poorly differentiated; Grade III	Not a paired site	8140/3: Adenocarcinoma, NOS	IV	IVB	41	Beam radiation	Yes	Radiation after surgery	40	13	11	10	Dead	21	White	Married (including common law)	10	T4a	N2b	M1b	Alive or dead due to cancer	Dead (attributable to this cancer dx)	Yes	One primary only	Any Medicaid	Female
2011	209	Moderately differentiated; Grade II	Not a paired site	8140/3: Adenocarcinoma, NOS	IV	IVA	0	Beam radiation	Yes	Radiation after surgery	40	0	98	56	Dead	49	Black	Married (including common law)	10	T3	N1NOS	M1a	Alive or dead due to cancer	Dead (attributable to this cancer dx)	Yes	One primary only	Insured	Female
2010	189	Unknown	Not a paired site	8140/3: Adenocarcinoma, NOS	IV	IVB	0	None/Unknown	Yes	No radiation and/or cancer-directed surgery	999	0	98	22	Dead	64	White	Married (including common law)	20	TX	NX	M1b	Alive or dead due to cancer	Dead (attributable to this cancer dx)	Yes	One primary only	Insured	Male
2010	182	Moderately differentiated; Grade II	Not a paired site	8140/3: Adenocarcinoma, NOS	IIA	IIA	40	None/Unknown	No/Unknown	No radiation and/or cancer-directed surgery	45	20	0	16	Dead	92	White	Widowed	20	T3	N0	M0	Dead (attributable to causes other than this cancer dx)	Alive or dead of other cause	Yes	One primary only	Insured	Female
2010	189	Unknown	Not a paired site	8140/3: Adenocarcinoma, NOS	IIB	IIC	0	None/Unknown	Yes	No radiation and/or cancer-directed surgery	999	0	98	8	Dead	62	Asian or Pacific Islander	Married (including common law)	10	T4b	N0	M0	Alive or dead due to cancer	Dead (attributable to this cancer dx)	Yes	One primary only	Insured	Female
2010	182	Poorly differentiated; Grade III	Not a paired site	8140/3: Adenocarcinoma, NOS	IIIB	IIIB	40	None/Unknown	Yes	No radiation and/or cancer-directed surgery	45	15	1	63	Alive	57	Black	Unknown	20	T3	N1a	M0	Alive or dead due to cancer	Alive or dead of other cause	Yes	One primary only	Any Medicaid	Female
2010	180	Unknown	Not a paired site	8210/3: Adenocarcinoma in adenomatous polyp	IV	IVB	0	None/Unknown	Yes	No radiation and/or cancer-directed surgery	80	0	98	14	Dead	62	White	Married (including common law)	10	T3	N1NOS	M1b	Alive or dead due to cancer	Dead (attributable to this cancer dx)	Yes	One primary only	Insured	Male
2010	186	Moderately differentiated; Grade II	Not a paired site	8140/3: Adenocarcinoma, NOS	IV	IVB	30	None/Unknown	Yes	No radiation and/or cancer-directed surgery	50	12	4	9	Dead	64	White	Married (including common law)	10	T3	N2a	M1b	Alive or dead due to cancer	Dead (attributable to this cancer dx)	Yes	One primary only	Insured	Male
2011	188	Unknown	Not a paired site	8140/3: Adenocarcinoma, NOS	IV	IVB	0	None/Unknown	Yes	No radiation and/or cancer-directed surgery	60	0	98	6	Dead	70	Black	Widowed	20	T4b	N0	M1b	Alive or dead due to cancer	Dead (attributable to this cancer dx)	Yes	One primary only	Insured/No specifics	Female
2011	209	Unknown	Not a paired site	8140/3: Adenocarcinoma, NOS	IV	IVA	30	Beam radiation	Yes	Radiation prior to surgery	50	13	2	57	Dead	49	White	Married (including common law)	20	T3	N1b	M1a	Alive or dead due to cancer	Dead (attributable to this cancer dx)	Yes	One primary only	Insured	Male
2010	182	Moderately differentiated; Grade II	Not a paired site	8140/3: Adenocarcinoma, NOS	IIIB	IIIB	40	None/Unknown	Yes	No radiation and/or cancer-directed surgery	15	19	1	62	Alive	63	White	Married (including common law)	10	T3	N1a	M0	Alive or dead due to cancer	Alive or dead of other cause	Yes	One primary only	Insured	Male
2011	180	Moderately differentiated; Grade II	Not a paired site	8140/3: Adenocarcinoma, NOS	IV	IVB	40	None/Unknown	Yes	No radiation and/or cancer-directed surgery	70	45	4	21	Dead	57	Black	Married (including common law)	10	T3	N2a	M1b	Alive or dead due to cancer	Dead (attributable to this cancer dx)	Yes	One primary only	Insured	Male
2010	180	Moderately differentiated; Grade II	Not a paired site	8140/3: Adenocarcinoma, NOS	IIA	IIA	30	None/Unknown	No/Unknown	No radiation and/or cancer-directed surgery	25	8	0	50	Dead	72	White	Widowed	10	T3	N0	M0	Alive or dead due to cancer	Dead (attributable to this cancer dx)	Yes	One primary only	Insured	Female
2010	180	Unknown	Not a paired site	8480/3: Mucinous adenocarcinoma	IV	IVB	40	None/Unknown	Yes	No radiation and/or cancer-directed surgery	58	51	14	48	Dead	52	White	Married (including common law)	10	T4b	N2b	M1b	Alive or dead due to cancer	Dead (attributable to this cancer dx)	Yes	One primary only	Insured	Female
2011	186	Moderately differentiated; Grade II	Not a paired site	8140/3: Adenocarcinoma, NOS	IIIB	IIIB	40	None/Unknown	Yes	No radiation and/or cancer-directed surgery	35	28	3	22	Dead	50	Black	Single (never married)	10	T4a	N1b	M0	Alive or dead due to cancer	Dead (attributable to this cancer dx)	Yes	One primary only	Insured	Female
2011	180	Unknown	Not a paired site	8140/3: Adenocarcinoma, NOS	IV	IVB	0	Beam radiation	Yes	No radiation and/or cancer-directed surgery	999	0	98	7	Dead	29	White	Single (never married)	20	TX	N0	M1b	Alive or dead due to cancer	Dead (attributable to this cancer dx)	Yes	One primary only	Insured	Female
2010	182	Poorly differentiated; Grade III	Not a paired site	8140/3: Adenocarcinoma, NOS	IIA	IIA	40	None/Unknown	Yes	No radiation and/or cancer-directed surgery	85	17	0	66	Alive	73	White	Married (including common law)	20	T3	N0	M0	Alive or dead due to cancer	Alive or dead of other cause	Yes	1st of 2 or more primaries	Insured/No specifics	Male
2010	199	Unknown	Not a paired site	8140/3: Adenocarcinoma, NOS	IV	IVA	0	None/Unknown	Yes	No radiation and/or cancer-directed surgery	999	0	98	66	Alive	68	White	Divorced	10	T3	N1NOS	M1a	Alive or dead due to cancer	Alive or dead of other cause	Yes	One primary only	Insured	Female
2010	199	Moderately differentiated; Grade II	Not a paired site	8263/3: Adenocarcinoma in tubulovillous adenoma	IIIB	IIIB	30	None/Unknown	No/Unknown	No radiation and/or cancer-directed surgery	30	16	1	66	Alive	64	White	Separated	10	T3	N1a	M0	Alive or dead due to cancer	Alive or dead of other cause	Yes	One primary only	Any Medicaid	Female
2010	199	Moderately differentiated; Grade II	Not a paired site	8140/3: Adenocarcinoma, NOS	IV	IVB	30	None/Unknown	Yes	No radiation and/or cancer-directed surgery	999	23	11	14	Dead	60	White	Married (including common law)	20	T3	N2b	M1b	Alive or dead due to cancer	Dead (attributable to this cancer dx)	Yes	One primary only	Insured	Female
2011	182	Moderately differentiated; Grade II	Not a paired site	8140/3: Adenocarcinoma, NOS	IV	IVA	40	None/Unknown	Yes	No radiation and/or cancer-directed surgery	80	23	3	17	Dead	40	Black	Single (never married)	10	T3	N1b	M1a	Alive or dead due to cancer	Dead (attributable to this cancer dx)	Yes	One primary only	Insured	Female
2010	199	Moderately differentiated; Grade II	Not a paired site	8140/3: Adenocarcinoma, NOS	IIIC	IIIC	31	None/Unknown	Yes	No radiation and/or cancer-directed surgery	45	14	4	18	Dead	47	White	Single (never married)	20	T4b	N2a	M0	Alive or dead due to cancer	Dead (attributable to this cancer dx)	Yes	One primary only	Insured	Male
2011	182	Moderately differentiated; Grade II	Not a paired site	8140/3: Adenocarcinoma, NOS	IV	IVA	40	None/Unknown	Yes	No radiation and/or cancer-directed surgery	60	16	3	56	Alive	42	Black	Single (never married)	20	T3	N1b	M1a	Alive or dead due to cancer	Alive or dead of other cause	Yes	One primary only	Insured	Male
2011	187	Moderately differentiated; Grade II	Not a paired site	8140/3: Adenocarcinoma, NOS	IV	IVA	0	None/Unknown	Yes	No radiation and/or cancer-directed surgery	80	0	98	6	Dead	51	Black	Single (never married)	20	T3	N0	M1a	Alive or dead due to cancer	Dead (attributable to this cancer dx)	Yes	One primary only	Any Medicaid	Male
2010	209	Unknown	Not a paired site	8140/3: Adenocarcinoma, NOS	IIIB	IIIB	50	Beam radiation	Yes	Radiation prior to surgery	30	4	0	62	Alive	87	White	Unknown	20	T3	N1a	M0	Alive or dead due to cancer	Alive or dead of other cause	Yes	One primary only	Insured	Female
2010	209	Moderately differentiated; Grade II	Not a paired site	8140/3: Adenocarcinoma, NOS	IIA	IIA	50	Beam radiation	Yes	Radiation after surgery	35	7	0	61	Alive	66	White	Married (including common law)	10	T3	N0	M0	Alive or dead due to cancer	Alive or dead of other cause	Yes	One primary only	Insured	Female
2011	187	Moderately differentiated; Grade II	Not a paired site	8140/3: Adenocarcinoma, NOS	IV	IVB	0	None/Unknown	Yes	No radiation and/or cancer-directed surgery	151	0	98	6	Dead	63	Black	Single (never married)	20	T4b	N1NOS	M1b	Alive or dead due to cancer	Dead (attributable to this cancer dx)	Yes	One primary only	Insured	Female
2011	187	Moderately differentiated; Grade II	Not a paired site	8140/3: Adenocarcinoma, NOS	IV	IVB	0	None/Unknown	Yes	No radiation and/or cancer-directed surgery	999	0	98	6	Dead	56	Black	Single (never married)	10	TX	N0	M1b	Alive or dead due to cancer	Dead (attributable to this cancer dx)	Yes	One primary only	Insured	Male
2010	184	Moderately differentiated; Grade II	Not a paired site	8140/3: Adenocarcinoma, NOS	IV	IVA	30	None/Unknown	Yes	No radiation and/or cancer-directed surgery	23	10	2	23	Dead	69	Black	Divorced	10	T3	N1b	M1a	Alive or dead due to cancer	Dead (attributable to this cancer dx)	Yes	One primary only	Any Medicaid	Female
2011	187	Unknown	Not a paired site	8480/3: Mucinous adenocarcinoma	IV	IVB	0	None/Unknown	Yes	No radiation and/or cancer-directed surgery	150	0	98	4	Dead	63	Black	Married (including common law)	20	T3	N0	M1b	Dead (attributable to causes other than this cancer dx)	Alive or dead of other cause	Yes	One primary only	Insured/No specifics	Male
2011	209	Moderately differentiated; Grade II	Not a paired site	8140/3: Adenocarcinoma, NOS	IV	IVA	0	None/Unknown	Yes	No radiation and/or cancer-directed surgery	999	0	98	20	Dead	61	Black	Separated	20	T4b	N2NOS	M1a	Alive or dead due to cancer	Dead (attributable to this cancer dx)	Yes	One primary only	Insured/No specifics	Male
2010	187	Moderately differentiated; Grade II	Not a paired site	8140/3: Adenocarcinoma, NOS	IV	IVA	30	None/Unknown	Yes	No radiation and/or cancer-directed surgery	35	24	6	28	Dead	45	White	Single (never married)	20	T3	N2a	M1a	Alive or dead due to cancer	Dead (attributable to this cancer dx)	Yes	One primary only	Insured	Male
2011	180	Unknown	Not a paired site	8140/3: Adenocarcinoma, NOS	IV	IVB	0	None/Unknown	Yes	No radiation and/or cancer-directed surgery	100	0	98	17	Dead	65	Black	Single (never married)	10	T1	N0	M1b	Alive or dead due to cancer	Dead (attributable to this cancer dx)	Yes	One primary only	Insured/No specifics	Female
2011	209	Moderately differentiated; Grade II	Not a paired site	8140/3: Adenocarcinoma, NOS	IIIA	IIIA	30	Beam radiation	Yes	Radiation prior to surgery	48	16	2	54	Alive	42	White	Married (including common law)	20	T2	N1b	M0	Alive or dead due to cancer	Alive or dead of other cause	Yes	One primary only	Insured	Male
2011	187	Moderately differentiated; Grade II	Not a paired site	8140/3: Adenocarcinoma, NOS	IV	IVB	0	Beam radiation	Yes	No radiation and/or cancer-directed surgery	15	0	98	18	Dead	43	White	Single (never married)	20	T1	N0	M1b	Alive or dead due to cancer	Dead (attributable to this cancer dx)	Yes	One primary only	Insured	Male
2011	187	Unknown	Not a paired site	8140/3: Adenocarcinoma, NOS	IV	IVB	0	None/Unknown	Yes	No radiation and/or cancer-directed surgery	999	0	98	38	Dead	59	White	Single (never married)	10	TX	N2NOS	M1b	Alive or dead due to cancer	Dead (attributable to this cancer dx)	Yes	One primary only	Insured	Female
2011	209	Moderately differentiated; Grade II	Not a paired site	8140/3: Adenocarcinoma, NOS	IV	IVA	30	Beam radiation	Yes	Radiation prior to surgery	999	10	0	30	Dead	42	White	Divorced	10	T3	N0	M1a	Alive or dead due to cancer	Dead (attributable to this cancer dx)	Yes	One primary only	Insured	Female
2010	188	Moderately differentiated; Grade II	Not a paired site	8140/3: Adenocarcinoma, NOS	IIA	IIA	40	None/Unknown	No/Unknown	No radiation and/or cancer-directed surgery	23	38	0	54	Dead	63	White	Married (including common law)	10	T3	N0	M0	Alive or dead due to cancer	Dead (attributable to this cancer dx)	Yes	1st of 2 or more primaries	Insured	Male
2010	180	Moderately differentiated; Grade II	Not a paired site	8140/3: Adenocarcinoma, NOS	IV	IVA	30	None/Unknown	Yes	No radiation and/or cancer-directed surgery	22	27	14	12	Dead	85	White	Married (including common law)	20	T3	N2b	M1a	Dead (attributable to causes other than this cancer dx)	Alive or dead of other cause	Yes	One primary only	Insured	Male
2011	188	Moderately differentiated; Grade II	Not a paired site	8140/3: Adenocarcinoma, NOS	IIIB	IIIB	41	None/Unknown	Yes	No radiation and/or cancer-directed surgery	50	22	2	59	Alive	76	White	Married (including common law)	10	T4a	N1b	M0	Alive or dead due to cancer	Alive or dead of other cause	Yes	One primary only	Insured	Female
2011	182	Poorly differentiated; Grade III	Not a paired site	8140/3: Adenocarcinoma, NOS	IV	IVA	40	None/Unknown	Yes	No radiation and/or cancer-directed surgery	85	28	11	8	Dead	81	White	Married (including common law)	20	T4a	N2b	M1a	Alive or dead due to cancer	Dead (attributable to this cancer dx)	Yes	One primary only	Insured	Male
2011	180	Moderately differentiated; Grade II	Not a paired site	8140/3: Adenocarcinoma, NOS	IV	IVA	40	None/Unknown	Yes	No radiation and/or cancer-directed surgery	39	9	5	36	Dead	83	Black	Divorced	10	T3	N2a	M1a	Alive or dead due to cancer	Dead (attributable to this cancer dx)	Yes	One primary only	Insured	Female
2011	180	Moderately differentiated; Grade II	Not a paired site	8140/3: Adenocarcinoma, NOS	IV	IVA	0	None/Unknown	Yes	No radiation and/or cancer-directed surgery	64	0	98	6	Dead	57	White	Married (including common law)	10	TX	N1NOS	M1a	Alive or dead due to cancer	Dead (attributable to this cancer dx)	Yes	One primary only	Insured	Male
2011	199	Moderately differentiated; Grade II	Not a paired site	8140/3: Adenocarcinoma, NOS	IV	IVA	30	None/Unknown	Yes	No radiation and/or cancer-directed surgery	55	16	0	42	Dead	61	White	Single (never married)	20	T3	N0	M1a	Alive or dead due to cancer	Dead (attributable to this cancer dx)	Yes	One primary only	Insured/No specifics	Male
2011	188	Poorly differentiated; Grade III	Not a paired site	8140/3: Adenocarcinoma, NOS	IV	IVB	40	None/Unknown	Yes	No radiation and/or cancer-directed surgery	73	22	22	37	Dead	62	White	Widowed	10	T4b	N2b	M1b	Alive or dead due to cancer	Dead (attributable to this cancer dx)	Yes	One primary only	Insured	Female
2011	199	Unknown	Not a paired site	8210/3: Adenocarcinoma in adenomatous polyp	IV	IVA	30	None/Unknown	Yes	No radiation and/or cancer-directed surgery	30	19	0	58	Dead	37	White	Married (including common law)	20	T1	N0	M1a	Alive or dead due to cancer	Dead (attributable to this cancer dx)	Yes	One primary only	Insured	Male
2011	180	Moderately differentiated; Grade II	Not a paired site	8263/3: Adenocarcinoma in tubulovillous adenoma	IV	IVA	30	None/Unknown	Yes	No radiation and/or cancer-directed surgery	33	13	0	30	Dead	64	White	Married (including common law)	10	T3	N0	M1a	Alive or dead due to cancer	Dead (attributable to this cancer dx)	Yes	One primary only	Insured	Male
2011	186	Unknown	Not a paired site	8480/3: Mucinous adenocarcinoma	IIIB	IIIB	40	None/Unknown	Yes	No radiation and/or cancer-directed surgery	50	66	2	55	Alive	42	White	Widowed	20	T3	N1b	M0	Alive or dead due to cancer	Alive or dead of other cause	Yes	One primary only	Insured/No specifics	Female
2011	180	Poorly differentiated; Grade III	Not a paired site	8480/3: Mucinous adenocarcinoma	IV	IVB	40	None/Unknown	Yes	No radiation and/or cancer-directed surgery	55	21	9	20	Dead	64	White	Married (including common law)	10	T4b	N2b	M1b	Alive or dead due to cancer	Dead (attributable to this cancer dx)	Yes	One primary only	Insured	Male
2011	182	Moderately differentiated; Grade II	Not a paired site	8140/3: Adenocarcinoma, NOS	IV	IVA	40	None/Unknown	Yes	No radiation and/or cancer-directed surgery	41	3	3	9	Dead	47	Black	Single (never married)	10	T3	N1b	M1a	N/A not first tumor	N/A not first tumor	Yes	2nd of 2 or more primaries	Insured	Male
2011	185	Moderately differentiated; Grade II	Not a paired site	8140/3: Adenocarcinoma, NOS	IIIB	IIIB	30	None/Unknown	Yes	No radiation and/or cancer-directed surgery	40	20	3	59	Alive	45	White	Married (including common law)	10	T3	N1b	M0	Alive or dead due to cancer	Alive or dead of other cause	Yes	1st of 2 or more primaries	Insured	Female
2011	182	Moderately differentiated; Grade II	Not a paired site	8480/3: Mucinous adenocarcinoma	IV	IVB	41	None/Unknown	Yes	No radiation and/or cancer-directed surgery	50	15	2	14	Dead	65	White	Separated	10	T4b	N1b	M1b	Alive or dead due to cancer	Dead (attributable to this cancer dx)	Yes	One primary only	Any Medicaid	Male
2010	187	Unknown	Not a paired site	8140/3: Adenocarcinoma, NOS	IV	IVA	0	None/Unknown	Yes	No radiation and/or cancer-directed surgery	999	0	98	32	Dead	54	White	Married (including common law)	20	TX	N0	M1a	Alive or dead due to cancer	Dead (attributable to this cancer dx)	Yes	One primary only	Insured	Male
2010	187	Moderately differentiated; Grade II	Not a paired site	8140/3: Adenocarcinoma, NOS	IIIC	IIIC	30	None/Unknown	Yes	No radiation and/or cancer-directed surgery	29	15	4	61	Alive	55	Black	Single (never married)	20	T4a	N2a	M0	Alive or dead due to cancer	Alive or dead of other cause	Yes	One primary only	Insured	Female
2010	187	Poorly differentiated; Grade III	Not a paired site	8140/3: Adenocarcinoma, NOS	IIIC	IIIC	30	None/Unknown	Yes	No radiation and/or cancer-directed surgery	80	18	8	52	Dead	62	Black	Widowed	20	T3	N2b	M0	Alive or dead due to cancer	Dead (attributable to this cancer dx)	Yes	One primary only	Any Medicaid	Female
2011	180	Moderately differentiated; Grade II	Not a paired site	8140/3: Adenocarcinoma, NOS	IV	IVA	0	None/Unknown	Yes	No radiation and/or cancer-directed surgery	999	0	98	6	Dead	59	Black	Single (never married)	10	TX	NX	M1a	Alive or dead due to cancer	Dead (attributable to this cancer dx)	Yes	One primary only	Insured	Male
2011	182	Undifferentiated; anaplastic; Grade IV	Not a paired site	8140/3: Adenocarcinoma, NOS	IIA	IIA	40	None/Unknown	No/Unknown	No radiation and/or cancer-directed surgery	120	18	0	57	Alive	84	White	Married (including common law)	20	T3	N0	M0	Alive or dead due to cancer	Alive or dead of other cause	Yes	One primary only	Insured	Male
2012	180	Moderately differentiated; Grade II	Not a paired site	8140/3: Adenocarcinoma, NOS	IIIC	IIIC	40	None/Unknown	Yes	No radiation and/or cancer-directed surgery	30	72	18	43	Alive	53	Black	Single (never married)	10	T3	N2b	M0	N/A not first tumor	N/A not first tumor	Yes	2nd of 2 or more primaries	Insured	Male
2011	180	Moderately differentiated; Grade II	Not a paired site	8140/3: Adenocarcinoma, NOS	IV	IVB	41	None/Unknown	No/Unknown	No radiation and/or cancer-directed surgery	45	26	0	13	Dead	83	White	Single (never married)	10	T4b	N0	M1b	Alive or dead due to cancer	Dead (attributable to this cancer dx)	Yes	One primary only	Insured/No specifics	Female
2011	180	Moderately differentiated; Grade II	Not a paired site	8140/3: Adenocarcinoma, NOS	IV	IVA	40	None/Unknown	Yes	No radiation and/or cancer-directed surgery	30	22	8	54	Alive	49	Black	Married (including common law)	10	T3	N2b	M1a	Alive or dead due to cancer	Alive or dead of other cause	Yes	One primary only	Insured	Male
2011	209	Unknown	Not a paired site	8140/3: Adenocarcinoma, NOS	IV	IVA	0	None/Unknown	Yes	No radiation and/or cancer-directed surgery	49	0	98	18	Dead	51	Black	Single (never married)	20	T2	N0	M1a	Alive or dead due to cancer	Dead (attributable to this cancer dx)	Yes	One primary only	Insured	Male
2011	187	Moderately differentiated; Grade II	Not a paired site	8140/3: Adenocarcinoma, NOS	IV	IVA	30	None/Unknown	Yes	No radiation and/or cancer-directed surgery	60	24	2	34	Dead	62	White	Married (including common law)	20	T3	N1b	M1a	Alive or dead due to cancer	Dead (attributable to this cancer dx)	Yes	One primary only	Insured	Male
2011	186	Moderately differentiated; Grade II	Not a paired site	8140/3: Adenocarcinoma, NOS	IIIB	IIIC	41	None/Unknown	Yes	No radiation and/or cancer-directed surgery	75	29	2	48	Dead	66	Black	Married (including common law)	20	T4b	N1b	M0	Alive or dead due to cancer	Dead (attributable to this cancer dx)	Yes	One primary only	Insured	Male
2011	182	Moderately differentiated; Grade II	Not a paired site	8480/3: Mucinous adenocarcinoma	IV	IVA	30	None/Unknown	Yes	No radiation and/or cancer-directed surgery	40	16	2	14	Dead	67	Black	Married (including common law)	10	T3	N1b	M1a	Alive or dead due to cancer	Dead (attributable to this cancer dx)	Yes	One primary only	Insured	Male
2011	209	Moderately differentiated; Grade II	Not a paired site	8140/3: Adenocarcinoma, NOS	IV	IVA	30	None/Unknown	Yes	No radiation and/or cancer-directed surgery	31	17	1	55	Alive	68	White	Married (including common law)	10	T3	N1a	M1a	Alive or dead due to cancer	Alive or dead of other cause	Yes	One primary only	Insured	Female
2011	184	Poorly differentiated; Grade III	Not a paired site	8140/3: Adenocarcinoma, NOS	IV	IVA	40	None/Unknown	Yes	No radiation and/or cancer-directed surgery	80	26	1	56	Alive	45	Black	Married (including common law)	20	T4a	N1a	M1a	Alive or dead due to cancer	Alive or dead of other cause	Yes	One primary only	Insured	Male
2011	180	Moderately differentiated; Grade II	Not a paired site	8140/3: Adenocarcinoma, NOS	IV	IVB	0	None/Unknown	Yes	No radiation and/or cancer-directed surgery	100	0	98	16	Dead	48	Black	Single (never married)	20	T1	N0	M1b	Alive or dead due to cancer	Dead (attributable to this cancer dx)	Yes	One primary only	Insured	Male
2011	180	Poorly differentiated; Grade III	Not a paired site	8490/3: Signet ring cell carcinoma	IV	IVB	40	None/Unknown	Yes	No radiation and/or cancer-directed surgery	25	16	2	14	Dead	64	White	Married (including common law)	20	T4b	N1b	M1b	Alive or dead due to cancer	Dead (attributable to this cancer dx)	Yes	One primary only	Uninsured	Male
2011	187	Well differentiated; Grade I	Not a paired site	8480/3: Mucinous adenocarcinoma	IIIB	IIIB	30	None/Unknown	No/Unknown	No radiation and/or cancer-directed surgery	40	13	3	37	Dead	71	White	Married (including common law)	10	T3	N1b	M0	Alive or dead due to cancer	Dead (attributable to this cancer dx)	Yes	One primary only	Insured	Female
2010	182	Moderately differentiated; Grade II	Not a paired site	8140/3: Adenocarcinoma, NOS	IV	IVA	40	None/Unknown	Yes	No radiation and/or cancer-directed surgery	72	31	8	11	Dead	57	White	Single (never married)	20	T3	N2b	M1a	Alive or dead due to cancer	Dead (attributable to this cancer dx)	Yes	One primary only	Insured	Male
2011	209	Undifferentiated; anaplastic; Grade IV	Not a paired site	8020/3: Carcinoma, undifferentiated, NOS	IIIC	IIIC	70	Beam radiation	No/Unknown	Radiation prior to surgery	130	11	0	21	Dead	59	Black	Married (including common law)	20	T4b	N2b	M0	Alive or dead due to cancer	Dead (attributable to this cancer dx)	Yes	One primary only	Insured	Female
2011	186	Moderately differentiated; Grade II	Not a paired site	8140/3: Adenocarcinoma, NOS	IV	IVA	30	None/Unknown	Yes	No radiation and/or cancer-directed surgery	32	19	0	32	Dead	51	White	Married (including common law)	20	T3	N0	M1a	Alive or dead due to cancer	Dead (attributable to this cancer dx)	Yes	One primary only	Insured	Male
2011	180	Unknown	Not a paired site	8140/3: Adenocarcinoma, NOS	IV	IVB	0	None/Unknown	Yes	No radiation and/or cancer-directed surgery	45	0	98	5	Dead	75	Black	Divorced	10	T3	N1NOS	M1b	Alive or dead due to cancer	Dead (attributable to this cancer dx)	Yes	One primary only	Insured/No specifics	Female
2011	209	Unknown	Not a paired site	8255/3: Adenocarcinoma with mixed subtypes	IV	IVB	0	None/Unknown	Yes	No radiation and/or cancer-directed surgery	999	0	98	50	Alive	36	White	Single (never married)	20	TX	N0	M1b	Alive or dead due to cancer	Alive or dead of other cause	Yes	One primary only	Any Medicaid	Male
2011	187	Unknown	Not a paired site	8140/3: Adenocarcinoma, NOS	IV	IVA	30	None/Unknown	Yes	No radiation and/or cancer-directed surgery	55	0	98	11	Dead	75	White	Married (including common law)	20	TX	N0	M1a	Alive or dead due to cancer	Dead (attributable to this cancer dx)	Yes	One primary only	Insured	Male
2011	189	Unknown	Not a paired site	8140/3: Adenocarcinoma, NOS	IV	IVB	0	None/Unknown	No/Unknown	No radiation and/or cancer-directed surgery	74	1	0	4	Dead	56	White	Married (including common law)	10	T2	N0	M1b	Alive or dead due to cancer	Dead (attributable to this cancer dx)	Yes	One primary only	Uninsured	Female
2011	180	Poorly differentiated; Grade III	Not a paired site	8490/3: Signet ring cell carcinoma	IV	IVB	32	None/Unknown	Yes	No radiation and/or cancer-directed surgery	28	20	17	22	Dead	54	White	Married (including common law)	20	T4a	N2b	M1b	Alive or dead due to cancer	Dead (attributable to this cancer dx)	Yes	One primary only	Insured	Female
2011	187	Moderately differentiated; Grade II	Not a paired site	8140/3: Adenocarcinoma, NOS	IV	IVA	0	None/Unknown	No/Unknown	No radiation and/or cancer-directed surgery	999	0	98	5	Dead	62	Black	Single (never married)	20	TX	N0	M1a	Alive or dead due to cancer	Dead (attributable to this cancer dx)	Yes	One primary only	Any Medicaid	Male
2011	180	Moderately differentiated; Grade II	Not a paired site	8140/3: Adenocarcinoma, NOS	IV	IVA	41	None/Unknown	Yes	No radiation and/or cancer-directed surgery	70	18	6	36	Dead	47	White	Unknown	20	T4b	N2a	M1a	Alive or dead due to cancer	Dead (attributable to this cancer dx)	Yes	One primary only	Insured	Female
2011	187	Moderately differentiated; Grade II	Not a paired site	8140/3: Adenocarcinoma, NOS	IV	IVA	30	None/Unknown	Yes	No radiation and/or cancer-directed surgery	60	22	4	54	Alive	55	White	Married (including common law)	10	T4a	N2a	M1a	N/A not first tumor	N/A not first tumor	Yes	2nd of 2 or more primaries	Insured	Female
2011	188	Moderately differentiated; Grade II	Not a paired site	8140/3: Adenocarcinoma, NOS	IV	IVA	40	None/Unknown	Yes	No radiation and/or cancer-directed surgery	60	12	2	20	Dead	58	Black	Married (including common law)	20	T3	N1b	M1a	Alive or dead due to cancer	Dead (attributable to this cancer dx)	Yes	One primary only	Insured	Male
2011	185	Moderately differentiated; Grade II	Not a paired site	8140/3: Adenocarcinoma, NOS	IV	IVA	40	None/Unknown	Yes	No radiation and/or cancer-directed surgery	90	3	0	8	Dead	21	White	Single (never married)	10	T3	N0	M1a	Alive or dead due to cancer	Dead (attributable to this cancer dx)	Yes	One primary only	Uninsured	Male
2011	187	Moderately differentiated; Grade II	Not a paired site	8140/3: Adenocarcinoma, NOS	IV	IVA	30	None/Unknown	Yes	No radiation and/or cancer-directed surgery	999	32	0	51	Alive	52	White	Married (including common law)	20	TX	N0	M1a	Alive or dead due to cancer	Alive or dead of other cause	Yes	One primary only	Insured	Female
2011	182	Poorly differentiated; Grade III	Not a paired site	8140/3: Adenocarcinoma, NOS	IV	IVB	0	None/Unknown	Yes	No radiation and/or cancer-directed surgery	40	0	98	31	Dead	86	White	Married (including common law)	20	TX	N1a	M1b	Alive or dead due to cancer	Dead (attributable to this cancer dx)	Yes	1st of 2 or more primaries	Insured	Male
2011	187	Poorly differentiated; Grade III	Not a paired site	8140/3: Adenocarcinoma, NOS	IV	IVB	0	None/Unknown	Yes	No radiation and/or cancer-directed surgery	999	0	98	31	Dead	86	White	Married (including common law)	20	TX	N1a	M1b	N/A not first tumor	N/A not first tumor	No	2nd of 2 or more primaries	Insured	Male
2011	209	Moderately differentiated; Grade II	Not a paired site	8140/3: Adenocarcinoma, NOS	IIA	IIA	50	Beam radiation	Yes	Radiation prior to surgery	38	18	0	49	Alive	39	Black	Married (including common law)	20	T3	N0	M0	Alive or dead due to cancer	Alive or dead of other cause	Yes	One primary only	Insured	Male
2011	187	Poorly differentiated; Grade III	Not a paired site	8480/3: Mucinous adenocarcinoma	IV	IVA	30	None/Unknown	Yes	No radiation and/or cancer-directed surgery	40	41	9	53	Alive	74	White	Married (including common law)	10	T3	N2b	M1a	Alive or dead due to cancer	Alive or dead of other cause	Yes	One primary only	Insured	Male
2011	180	Well differentiated; Grade I	Not a paired site	8480/3: Mucinous adenocarcinoma	IIIC	IIIC	40	None/Unknown	Yes	No radiation and/or cancer-directed surgery	105	28	4	7	Dead	56	Black	Single (never married)	20	T4b	N2a	M0	Alive or dead due to cancer	Dead (attributable to this cancer dx)	Yes	One primary only	Insured	Female
2012	182	Unknown	Not a paired site	8140/3: Adenocarcinoma, NOS	IV	IVB	0	None/Unknown	Yes	No radiation and/or cancer-directed surgery	999	0	98	4	Dead	61	Black	Widowed	10	T3	N1NOS	M1b	Alive or dead due to cancer	Dead (attributable to this cancer dx)	Yes	One primary only	Insured	Female
2011	180	Moderately differentiated; Grade II	Not a paired site	8263/3: Adenocarcinoma in tubulovillous adenoma	IV	IVA	40	None/Unknown	Yes	No radiation and/or cancer-directed surgery	45	18	11	16	Dead	49	White	Married (including common law)	20	T3	N2b	M1a	Alive or dead due to cancer	Dead (attributable to this cancer dx)	Yes	One primary only	Insured	Male
2011	209	Moderately differentiated; Grade II	Not a paired site	8140/3: Adenocarcinoma, NOS	IV	IVA	0	None/Unknown	Yes	No radiation and/or cancer-directed surgery	999	0	98	7	Dead	38	White	Married (including common law)	20	T3	N0	M1a	Alive or dead due to cancer	Dead (attributable to this cancer dx)	Yes	One primary only	Insured	Male
2011	187	Poorly differentiated; Grade III	Not a paired site	8140/3: Adenocarcinoma, NOS	IIIC	IIIC	50	None/Unknown	Yes	No radiation and/or cancer-directed surgery	22	12	11	28	Dead	49	White	Married (including common law)	20	T3	N2b	M0	Alive or dead due to cancer	Dead (attributable to this cancer dx)	Yes	One primary only	Insured	Female
2011	185	Moderately differentiated; Grade II	Not a paired site	8140/3: Adenocarcinoma, NOS	IV	IVA	30	None/Unknown	Yes	No radiation and/or cancer-directed surgery	80	12	0	58	Alive	63	Black	Married (including common law)	20	T4b	N0	M1a	Alive or dead due to cancer	Alive or dead of other cause	Yes	One primary only	Insured	Male
2011	209	Moderately differentiated; Grade II	Not a paired site	8140/3: Adenocarcinoma, NOS	IV	IVA	0	None/Unknown	Yes	No radiation and/or cancer-directed surgery	999	0	98	47	Dead	44	White	Married (including common law)	20	T1	N0	M1a	Alive or dead due to cancer	Dead (attributable to this cancer dx)	Yes	One primary only	Insured	Male
2012	187	Moderately differentiated; Grade II	Not a paired site	8140/3: Adenocarcinoma, NOS	IV	IVB	70	None/Unknown	Yes	No radiation and/or cancer-directed surgery	60	16	14	27	Dead	39	White	Divorced	10	T4a	N2b	M1b	Alive or dead due to cancer	Dead (attributable to this cancer dx)	Yes	One primary only	Insured	Female
2011	187	Unknown	Not a paired site	8140/3: Adenocarcinoma, NOS	IV	IVA	32	Beam radiation	Yes	Radiation prior to surgery	30	17	2	31	Dead	52	White	Married (including common law)	20	T3	N1b	M1a	Alive or dead due to cancer	Dead (attributable to this cancer dx)	Yes	One primary only	Insured	Male
2012	180	Poorly differentiated; Grade III	Not a paired site	8140/3: Adenocarcinoma, NOS	IIIC	IIIC	30	None/Unknown	No/Unknown	No radiation and/or cancer-directed surgery	55	16	11	19	Dead	83	White	Widowed	10	T4b	N2b	M0	Alive or dead due to cancer	Dead (attributable to this cancer dx)	Yes	One primary only	Insured	Female
2011	182	Undifferentiated; anaplastic; Grade IV	Not a paired site	8140/3: Adenocarcinoma, NOS	IV	IVA	30	Beam radiation	Yes	Radiation after surgery	60	14	10	8	Dead	53	White	Married (including common law)	10	T4b	N2b	M1a	Alive or dead due to cancer	Dead (attributable to this cancer dx)	Yes	One primary only	Insured	Female
2011	180	Poorly differentiated; Grade III	Not a paired site	8140/3: Adenocarcinoma, NOS	IIA	IIA	40	None/Unknown	No/Unknown	No radiation and/or cancer-directed surgery	56	30	0	59	Alive	50	White	Married (including common law)	10	T3	N0	M0	N/A not first tumor	N/A not first tumor	Yes	2nd of 2 or more primaries	Insured	Male
2011	187	Unknown	Not a paired site	8140/3: Adenocarcinoma, NOS	IV	IVB	0	None/Unknown	Yes	No radiation and/or cancer-directed surgery	102	0	98	7	Dead	58	Black	Married (including common law)	10	T4b	N0	M1b	Alive or dead due to cancer	Dead (attributable to this cancer dx)	Yes	One primary only	Insured	Male
2012	187	Moderately differentiated; Grade II	Not a paired site	8140/3: Adenocarcinoma, NOS	IIIC	IIIC	30	None/Unknown	Yes	No radiation and/or cancer-directed surgery	113	21	11	40	Dead	58	Asian or Pacific Islander	Married (including common law)	20	T3	N2b	M0	Alive or dead due to cancer	Dead (attributable to this cancer dx)	Yes	One primary only	Insured/No specifics	Female
2011	187	Moderately differentiated; Grade II	Not a paired site	8140/3: Adenocarcinoma, NOS	IV	IVA	50	None/Unknown	Yes	No radiation and/or cancer-directed surgery	30	22	0	50	Alive	78	White	Married (including common law)	20	T3	N1c	M1a	Alive or dead due to cancer	Alive or dead of other cause	Yes	One primary only	Insured/No specifics	Male
2011	182	Moderately differentiated; Grade II	Not a paired site	8140/3: Adenocarcinoma, NOS	IIA	IIA	41	None/Unknown	No/Unknown	No radiation and/or cancer-directed surgery	70	24	0	49	Alive	57	Black	Single (never married)	10	T3	N0	M0	Alive or dead due to cancer	Alive or dead of other cause	Yes	One primary only	Insured/No specifics	Male
2011	182	Moderately differentiated; Grade II	Not a paired site	8140/3: Adenocarcinoma, NOS	IV	IVA	0	None/Unknown	Yes	No radiation and/or cancer-directed surgery	999	0	98	14	Dead	79	White	Married (including common law)	10	TX	N0	M1a	Alive or dead due to cancer	Dead (attributable to this cancer dx)	Yes	One primary only	Insured	Male
2011	186	Moderately differentiated; Grade II	Not a paired site	8140/3: Adenocarcinoma, NOS	IV	IVB	51	Beam radiation	Yes	Radiation after surgery	65	37	4	15	Dead	63	Black	Widowed	10	T3	N2a	M1b	Alive or dead due to cancer	Dead (attributable to this cancer dx)	Yes	One primary only	Insured/No specifics	Male
2012	209	Unknown	Not a paired site	8263/3: Adenocarcinoma in tubulovillous adenoma	IIIC	IIINOS	30	Beam radiation	Yes	Radiation prior to surgery	999	11	1	46	Alive	52	White	Single (never married)	10	T3	N2NOS	M0	Alive or dead due to cancer	Alive or dead of other cause	Yes	One primary only	Insured	Male
2011	184	Unknown	Not a paired site	8140/3: Adenocarcinoma, NOS	IV	IVB	0	None/Unknown	Yes	No radiation and/or cancer-directed surgery	999	0	98	6	Dead	72	White	Married (including common law)	20	TX	N0	M1b	Alive or dead due to cancer	Dead (attributable to this cancer dx)	Yes	One primary only	Insured	Male
2012	182	Moderately differentiated; Grade II	Not a paired site	8140/3: Adenocarcinoma, NOS	IV	IVB	40	None/Unknown	Yes	No radiation and/or cancer-directed surgery	50	19	1	15	Dead	62	White	Married (including common law)	10	T3	N1a	M1b	Dead (attributable to causes other than this cancer dx)	Alive or dead of other cause	Yes	1st of 2 or more primaries	Insured	Male
2012	186	Poorly differentiated; Grade III	Not a paired site	8480/3: Mucinous adenocarcinoma	IV	IVA	40	None/Unknown	Yes	No radiation and/or cancer-directed surgery	85	16	4	21	Dead	68	Asian or Pacific Islander	Married (including common law)	20	T4a	N2a	M1a	N/A not first tumor	N/A not first tumor	Yes	2nd of 2 or more primaries	Insured/No specifics	Female
2011	182	Poorly differentiated; Grade III	Not a paired site	8140/3: Adenocarcinoma, NOS	IIIB	IIIB	40	None/Unknown	No/Unknown	No radiation and/or cancer-directed surgery	80	10	1	13	Dead	67	Black	Widowed	20	T3	N1a	M0	Alive or dead due to cancer	Dead (attributable to this cancer dx)	Yes	1st of 2 or more primaries	Insured	Male
2011	180	Moderately differentiated; Grade II	Not a paired site	8140/3: Adenocarcinoma, NOS	IV	IVA	30	None/Unknown	No/Unknown	No radiation and/or cancer-directed surgery	29	18	1	50	Alive	65	White	Married (including common law)	20	T3	N1a	M1a	Alive or dead due to cancer	Alive or dead of other cause	Yes	One primary only	Insured	Female
2012	199	Moderately differentiated; Grade II	Not a paired site	8140/3: Adenocarcinoma, NOS	IV	IVB	40	None/Unknown	Yes	No radiation and/or cancer-directed surgery	999	0	98	13	Dead	56	Black	Separated	10	T3	N0	M1b	Alive or dead due to cancer	Dead (attributable to this cancer dx)	Yes	One primary only	Insured	Female
2011	182	Moderately differentiated; Grade II	Not a paired site	8140/3: Adenocarcinoma, NOS	IV	IVA	40	None/Unknown	Yes	No radiation and/or cancer-directed surgery	50	23	0	17	Dead	68	Black	Widowed	10	T4a	N0	M1a	Alive or dead due to cancer	Dead (attributable to this cancer dx)	Yes	One primary only	Insured	Female
2011	199	Moderately differentiated; Grade II	Not a paired site	8140/3: Adenocarcinoma, NOS	IIIC	IIIC	30	None/Unknown	No/Unknown	No radiation and/or cancer-directed surgery	60	17	7	57	Alive	39	White	Married (including common law)	20	T3	N2b	M0	Alive or dead due to cancer	Alive or dead of other cause	Yes	One primary only	Insured	Female
2011	180	Moderately differentiated; Grade II	Not a paired site	8140/3: Adenocarcinoma, NOS	IV	IVB	40	None/Unknown	Yes	No radiation and/or cancer-directed surgery	65	15	11	30	Dead	64	White	Married (including common law)	20	T4a	N2b	M1b	Alive or dead due to cancer	Dead (attributable to this cancer dx)	Yes	1st of 2 or more primaries	Insured	Male
2011	180	Moderately differentiated; Grade II	Not a paired site	8140/3: Adenocarcinoma, NOS	IV	IVA	32	None/Unknown	No/Unknown	No radiation and/or cancer-directed surgery	110	24	7	19	Dead	59	White	Married (including common law)	10	T4b	N2b	M1a	Alive or dead due to cancer	Dead (attributable to this cancer dx)	Yes	One primary only	Insured	Male
2011	187	Well differentiated; Grade I	Not a paired site	8140/3: Adenocarcinoma, NOS	IV	IVA	50	None/Unknown	Yes	No radiation and/or cancer-directed surgery	95	15	4	18	Dead	62	Black	Married (including common law)	10	T3	N2a	M1a	Alive or dead due to cancer	Dead (attributable to this cancer dx)	Yes	One primary only	Insured/No specifics	Male
2012	187	Poorly differentiated; Grade III	Not a paired site	8140/3: Adenocarcinoma, NOS	IV	IVA	30	None/Unknown	Yes	No radiation and/or cancer-directed surgery	999	16	0	45	Alive	39	White	Married (including common law)	20	T3	N1NOS	M1a	Alive or dead due to cancer	Alive or dead of other cause	Yes	One primary only	Insured	Male
2011	187	Moderately differentiated; Grade II	Not a paired site	8140/3: Adenocarcinoma, NOS	IV	IVB	41	None/Unknown	Yes	No radiation and/or cancer-directed surgery	30	11	1	15	Dead	59	Black	Married (including common law)	20	T4a	N1a	M1b	Dead (attributable to causes other than this cancer dx)	Alive or dead of other cause	Yes	One primary only	Any Medicaid	Female
2011	187	Unknown	Not a paired site	8140/3: Adenocarcinoma, NOS	IV	IVB	40	None/Unknown	Yes	No radiation and/or cancer-directed surgery	31	26	19	23	Dead	45	White	Married (including common law)	20	T4a	N2b	M1b	Alive or dead due to cancer	Dead (attributable to this cancer dx)	Yes	One primary only	Insured	Male
2012	209	Moderately differentiated; Grade II	Not a paired site	8140/3: Adenocarcinoma, NOS	IV	IVB	0	Beam radiation	Yes	No radiation and/or cancer-directed surgery	60	0	98	42	Dead	47	Black	Married (including common law)	10	T1	N1b	M1b	N/A not first tumor	N/A not first tumor	Yes	2nd of 2 or more primaries	Insured/No specifics	Male
2012	186	Poorly differentiated; Grade III	Not a paired site	8140/3: Adenocarcinoma, NOS	IIIC	IIIC	40	None/Unknown	Yes	No radiation and/or cancer-directed surgery	50	17	5	28	Dead	60	White	Married (including common law)	20	T4a	N2a	M0	Alive or dead due to cancer	Dead (attributable to this cancer dx)	Yes	One primary only	Insured	Male
2011	180	Poorly differentiated; Grade III	Not a paired site	8140/3: Adenocarcinoma, NOS	IV	IVB	30	None/Unknown	Yes	No radiation and/or cancer-directed surgery	60	11	9	11	Dead	62	White	Divorced	10	T3	N2b	M1b	Alive or dead due to cancer	Dead (attributable to this cancer dx)	Yes	One primary only	Any Medicaid	Female
2012	209	Poorly differentiated; Grade III	Not a paired site	8140/3: Adenocarcinoma, NOS	IIIC	IIIC	30	Beam radiation	Yes	Radiation prior to surgery	999	0	98	43	Alive	41	Black	Single (never married)	20	T3	N2b	M0	Alive or dead due to cancer	Alive or dead of other cause	Yes	One primary only	Insured	Male
2011	182	Moderately differentiated; Grade II	Not a paired site	8261/3: Adenocarcinoma in villous adenoma	IV	IVA	0	None/Unknown	Yes	No radiation and/or cancer-directed surgery	999	0	98	17	Dead	49	White	Single (never married)	20	T3	N0	M1a	N/A not first tumor	N/A not first tumor	Yes	2nd of 2 or more primaries	Insurance status unknown	Male
2012	180	Poorly differentiated; Grade III	Not a paired site	8140/3: Adenocarcinoma, NOS	IV	IVB	51	None/Unknown	No/Unknown	No radiation and/or cancer-directed surgery	70	13	6	16	Dead	71	White	Married (including common law)	10	T3	N2a	M1b	N/A not first tumor	N/A not first tumor	No	2nd of 2 or more primaries	Insured	Male
2011	180	Poorly differentiated; Grade III	Not a paired site	8140/3: Adenocarcinoma, NOS	IV	IVB	30	None/Unknown	Yes	No radiation and/or cancer-directed surgery	35	20	12	30	Dead	63	White	Unknown	10	T3	N2b	M1b	Alive or dead due to cancer	Dead (attributable to this cancer dx)	Yes	One primary only	Insured	Male
2011	180	Moderately differentiated; Grade II	Not a paired site	8140/3: Adenocarcinoma, NOS	IIIB	IIIC	41	None/Unknown	Yes	No radiation and/or cancer-directed surgery	70	18	3	48	Alive	56	White	Separated	10	T4b	N1b	M0	Alive or dead due to cancer	Alive or dead of other cause	Yes	One primary only	Insured	Male
2012	187	Poorly differentiated; Grade III	Not a paired site	8140/3: Adenocarcinoma, NOS	IV	IVB	30	None/Unknown	Yes	No radiation and/or cancer-directed surgery	60	12	7	10	Dead	61	White	Divorced	10	T4a	N2b	M1b	N/A not first tumor	N/A not first tumor	Yes	2nd of 2 or more primaries	Insured	Male
2011	180	Moderately differentiated; Grade II	Not a paired site	8140/3: Adenocarcinoma, NOS	IIIB	IIIB	40	None/Unknown	Yes	No radiation and/or cancer-directed surgery	35	29	1	48	Alive	67	Black	Divorced	20	T3	N1a	M0	Alive or dead due to cancer	Alive or dead of other cause	Yes	1st of 2 or more primaries	Insured	Female
2011	184	Unknown	Not a paired site	8140/3: Adenocarcinoma, NOS	IV	IVB	30	None/Unknown	Yes	No radiation and/or cancer-directed surgery	999	0	98	4	Dead	56	Black	Married (including common law)	20	TX	N1NOS	M1b	Alive or dead due to cancer	Dead (attributable to this cancer dx)	Yes	1st of 2 or more primaries	Insured	Male
2012	209	Unknown	Not a paired site	8140/3: Adenocarcinoma, NOS	IV	IVA	0	Beam radiation	No/Unknown	No radiation and/or cancer-directed surgery	999	0	98	5	Dead	68	Black	Single (never married)	20	T3	N1a	M1a	Alive or dead due to cancer	Dead (attributable to this cancer dx)	Yes	1st of 2 or more primaries	Insured	Male
2011	209	Moderately differentiated; Grade II	Not a paired site	8140/3: Adenocarcinoma, NOS	IV	IVA	0	None/Unknown	Yes	No radiation and/or cancer-directed surgery	999	0	98	17	Dead	44	White	Married (including common law)	10	T4b	N1NOS	M1a	Alive or dead due to cancer	Dead (attributable to this cancer dx)	Yes	One primary only	Insured	Female
2012	180	Moderately differentiated; Grade II	Not a paired site	8480/3: Mucinous adenocarcinoma	IIIB	IIIB	30	None/Unknown	Yes	No radiation and/or cancer-directed surgery	85	24	2	44	Alive	53	White	Married (including common law)	20	T3	N1b	M0	Alive or dead due to cancer	Alive or dead of other cause	Yes	1st of 2 or more primaries	Insured	Female
2012	209	Moderately differentiated; Grade II	Not a paired site	8140/3: Adenocarcinoma, NOS	IIIC	IIIC	30	Beam radiation	Yes	Radiation after surgery	49	31	13	44	Alive	53	White	Married (including common law)	20	T3	N2b	M0	N/A not first tumor	N/A not first tumor	Yes	2nd of 2 or more primaries	Insured	Female
2011	199	Moderately differentiated; Grade II	Not a paired site	8140/3: Adenocarcinoma, NOS	IIA	IIA	30	None/Unknown	Yes	No radiation and/or cancer-directed surgery	33	0	98	57	Alive	54	Asian or Pacific Islander	Married (including common law)	10	T3	N0	M0	Alive or dead due to cancer	Alive or dead of other cause	Yes	One primary only	Any Medicaid	Male
2011	188	Poorly differentiated; Grade III	Not a paired site	8140/3: Adenocarcinoma, NOS	IIIC	IIIC	40	None/Unknown	Yes	No radiation and/or cancer-directed surgery	70	20	14	29	Dead	63	White	Divorced	10	T4b	N2b	M0	Dead (attributable to causes other than this cancer dx)	Alive or dead of other cause	Yes	One primary only	Insured	Male
2011	182	Moderately differentiated; Grade II	Not a paired site	8140/3: Adenocarcinoma, NOS	IV	IVA	40	None/Unknown	Yes	No radiation and/or cancer-directed surgery	55	14	4	54	Alive	79	White	Single (never married)	20	T3	N2a	M1a	Alive or dead due to cancer	Alive or dead of other cause	Yes	One primary only	Insured	Male
2011	182	Unknown	Not a paired site	8140/3: Adenocarcinoma, NOS	IV	IVB	0	Beam radiation	Yes	No radiation and/or cancer-directed surgery	44	0	98	23	Dead	76	White	Married (including common law)	10	TX	N0	M1b	Alive or dead due to cancer	Dead (attributable to this cancer dx)	Yes	One primary only	Insured	Female
2011	182	Unknown	Not a paired site	8140/3: Adenocarcinoma, NOS	IV	IVB	0	Beam radiation	Yes	Radiation after surgery	60	0	98	12	Dead	62	Black	Divorced	20	TX	N2b	M1b	Alive or dead due to cancer	Dead (attributable to this cancer dx)	Yes	One primary only	Insured	Male
2012	187	Unknown	Not a paired site	8140/3: Adenocarcinoma, NOS	IIIB	IIIC	40	None/Unknown	No/Unknown	No radiation and/or cancer-directed surgery	55	16	3	6	Dead	76	White	Married (including common law)	10	T4b	N1b	M0	N/A not first tumor	N/A not first tumor	Yes	3rd of 3 or more primaries	Insured	Male
2012	180	Poorly differentiated; Grade III	Not a paired site	8140/3: Adenocarcinoma, NOS	IIIB	IIIB	40	None/Unknown	Yes	No radiation and/or cancer-directed surgery	135	6	1	15	Dead	69	White	Single (never married)	20	T3	N1a	M0	Dead (attributable to causes other than this cancer dx)	Alive or dead of other cause	Yes	1st of 2 or more primaries	Insured	Male
2012	199	Moderately differentiated; Grade II	Not a paired site	8140/3: Adenocarcinoma, NOS	IV	IVA	0	None/Unknown	Yes	No radiation and/or cancer-directed surgery	999	0	98	23	Dead	59	White	Married (including common law)	10	T1	N0	M1a	N/A not first tumor	N/A not first tumor	Yes	3rd of 3 or more primaries	Insured	Male
2012	186	Poorly differentiated; Grade III	Not a paired site	8140/3: Adenocarcinoma, NOS	IV	IVB	40	None/Unknown	Yes	No radiation and/or cancer-directed surgery	65	17	0	26	Dead	67	White	Divorced	20	T4a	N1c	M1b	Alive or dead due to cancer	Dead (attributable to this cancer dx)	Yes	One primary only	Insured	Male
2012	182	Moderately differentiated; Grade II	Not a paired site	8140/3: Adenocarcinoma, NOS	IV	IVB	40	None/Unknown	Yes	No radiation and/or cancer-directed surgery	45	19	9	25	Dead	72	White	Widowed	10	T3	N2b	M1b	Alive or dead due to cancer	Dead (attributable to this cancer dx)	Yes	One primary only	Insured/No specifics	Female
2011	184	Moderately differentiated; Grade II	Not a paired site	8481/3: Mucin-producing adenocarcinoma	IV	IVA	40	None/Unknown	Yes	No radiation and/or cancer-directed surgery	55	31	3	18	Dead	53	White	Married (including common law)	10	T3	N1b	M1a	Alive or dead due to cancer	Dead (attributable to this cancer dx)	Yes	One primary only	Insured	Male
2011	209	Unknown	Not a paired site	8140/3: Adenocarcinoma, NOS	IV	IVA	30	Beam radiation	Yes	Radiation prior to surgery	20	2	1	44	Dead	59	White	Unknown	10	T3	N1NOS	M1a	Alive or dead due to cancer	Dead (attributable to this cancer dx)	Yes	One primary only	Insured	Female
2011	209	Poorly differentiated; Grade III	Not a paired site	8480/3: Mucinous adenocarcinoma	IIIC	IIIC	30	Recommended, unknown if administered	Yes	No radiation and/or cancer-directed surgery	60	12	9	15	Dead	69	White	Married (including common law)	20	T4b	N2b	M0	Alive or dead due to cancer	Dead (attributable to this cancer dx)	Yes	One primary only	Insured	Male
2011	187	Unknown	Not a paired site	8140/3: Adenocarcinoma, NOS	IV	IVA	0	None/Unknown	No/Unknown	No radiation and/or cancer-directed surgery	999	0	98	40	Dead	72	White	Married (including common law)	10	T1	N0	M1a	Alive or dead due to cancer	Dead (attributable to this cancer dx)	Yes	One primary only	Insured	Female
2011	180	Moderately differentiated; Grade II	Not a paired site	8140/3: Adenocarcinoma, NOS	IIIC	IIIC	30	Beam radiation	Yes	Radiation after surgery	27	22	13	31	Dead	56	White	Married (including common law)	20	T4b	N2b	M0	Alive or dead due to cancer	Dead (attributable to this cancer dx)	Yes	One primary only	Insured	Female
2012	187	Poorly differentiated; Grade III	Not a paired site	8140/3: Adenocarcinoma, NOS	IIIB	IIIB	30	None/Unknown	Yes	No radiation and/or cancer-directed surgery	20	14	1	43	Dead	85	White	Single (never married)	20	T3	N1a	M0	Alive or dead due to cancer	Dead (attributable to this cancer dx)	Yes	One primary only	Insured	Male
2012	182	Moderately differentiated; Grade II	Not a paired site	8140/3: Adenocarcinoma, NOS	IV	IVB	40	None/Unknown	Yes	No radiation and/or cancer-directed surgery	36	20	18	41	Alive	70	White	Married (including common law)	20	T3	N2b	M1b	Alive or dead due to cancer	Alive or dead of other cause	Yes	One primary only	Insured/No specifics	Female
2011	187	Moderately differentiated; Grade II	Not a paired site	8140/3: Adenocarcinoma, NOS	IV	IVA	30	None/Unknown	Yes	No radiation and/or cancer-directed surgery	45	17	8	24	Dead	65	White	Divorced	20	T3	N2b	M1a	Alive or dead due to cancer	Dead (attributable to this cancer dx)	Yes	One primary only	Any Medicaid	Male
2012	180	Moderately differentiated; Grade II	Not a paired site	8140/3: Adenocarcinoma, NOS	IV	IVB	0	None/Unknown	Yes	No radiation and/or cancer-directed surgery	62	0	98	23	Dead	56	Black	Single (never married)	20	T1	N1NOS	M1b	Dead (attributable to causes other than this cancer dx)	Alive or dead of other cause	Yes	One primary only	Insured	Male
2012	182	Moderately differentiated; Grade II	Not a paired site	8140/3: Adenocarcinoma, NOS	IV	IVB	41	None/Unknown	Yes	No radiation and/or cancer-directed surgery	69	20	2	13	Dead	49	Black	Divorced	10	T3	N1b	M1b	Alive or dead due to cancer	Dead (attributable to this cancer dx)	Yes	One primary only	Any Medicaid	Male
2012	187	Moderately differentiated; Grade II	Not a paired site	8140/3: Adenocarcinoma, NOS	IV	IVB	40	None/Unknown	Yes	No radiation and/or cancer-directed surgery	90	16	9	20	Dead	69	Black	Divorced	20	T3	N2b	M1b	Alive or dead due to cancer	Dead (attributable to this cancer dx)	Yes	One primary only	Any Medicaid	Male
2012	199	Moderately differentiated; Grade II	Not a paired site	8263/3: Adenocarcinoma in tubulovillous adenoma	IV	IVA	70	None/Unknown	No/Unknown	No radiation and/or cancer-directed surgery	50	12	7	8	Alive	49	Black	Divorced	20	T3	N2b	M1a	Alive or dead due to cancer	Alive or dead of other cause	Yes	One primary only	Insured/No specifics	Female
2012	199	Poorly differentiated; Grade III	Not a paired site	8140/3: Adenocarcinoma, NOS	IV	IVB	0	Beam radiation	Yes	No radiation and/or cancer-directed surgery	90	0	98	18	Dead	60	White	Divorced	20	TX	N0	M1b	Alive or dead due to cancer	Dead (attributable to this cancer dx)	Yes	One primary only	Insured	Male
2012	187	Unknown	Not a paired site	8140/3: Adenocarcinoma, NOS	IV	IVB	0	None/Unknown	Yes	No radiation and/or cancer-directed surgery	999	0	98	35	Dead	62	White	Married (including common law)	10	T4b	N0	M1b	Alive or dead due to cancer	Dead (attributable to this cancer dx)	Yes	One primary only	Insured/No specifics	Male
2012	187	Moderately differentiated; Grade II	Not a paired site	8140/3: Adenocarcinoma, NOS	IV	IVB	30	None/Unknown	Yes	No radiation and/or cancer-directed surgery	63	16	4	44	Alive	44	White	Divorced	20	T4a	N2a	M1b	Alive or dead due to cancer	Alive or dead of other cause	Yes	1st of 2 or more primaries	Uninsured	Female
2012	209	Unknown	Not a paired site	8140/3: Adenocarcinoma, NOS	IV	IVB	0	None/Unknown	Yes	No radiation and/or cancer-directed surgery	70	0	98	4	Dead	66	White	Divorced	10	T3	N1a	M1b	Alive or dead due to cancer	Dead (attributable to this cancer dx)	Yes	One primary only	Insured/No specifics	Male
2012	209	Moderately differentiated; Grade II	Not a paired site	8140/3: Adenocarcinoma, NOS	IV	IVB	40	None/Unknown	Yes	No radiation and/or cancer-directed surgery	50	30	5	45	Alive	54	White	Unknown	20	T4b	N2a	M1b	Alive or dead due to cancer	Alive or dead of other cause	Yes	One primary only	Insured	Male
2012	209	Unknown	Not a paired site	8140/3: Adenocarcinoma, NOS	IIA	IIA	30	Beam radiation	Yes	Radiation prior to surgery	40	0	98	43	Alive	78	Black	Married (including common law)	20	T3	N0	M0	Alive or dead due to cancer	Alive or dead of other cause	Yes	One primary only	Insured	Male
2012	199	Unknown	Not a paired site	8140/3: Adenocarcinoma, NOS	IV	IVB	40	None/Unknown	Yes	No radiation and/or cancer-directed surgery	999	0	98	35	Dead	37	White	Married (including common law)	10	TX	N0	M1b	Alive or dead due to cancer	Dead (attributable to this cancer dx)	Yes	One primary only	Insured	Male
2012	209	Moderately differentiated; Grade II	Not a paired site	8140/3: Adenocarcinoma, NOS	IV	IVB	30	None/Unknown	Yes	No radiation and/or cancer-directed surgery	16	10	2	41	Alive	79	Black	Married (including common law)	20	T3	N1b	M1b	Alive or dead due to cancer	Alive or dead of other cause	Yes	One primary only	Insured	Female
2012	182	Moderately differentiated; Grade II	Not a paired site	8140/3: Adenocarcinoma, NOS	IV	IVA	41	None/Unknown	Yes	No radiation and/or cancer-directed surgery	30	21	6	13	Dead	73	White	Single (never married)	20	T3	N2a	M1a	Alive or dead due to cancer	Dead (attributable to this cancer dx)	Yes	One primary only	Insured	Female
2012	186	Moderately differentiated; Grade II	Not a paired site	8140/3: Adenocarcinoma, NOS	IV	IVA	30	None/Unknown	Yes	No radiation and/or cancer-directed surgery	85	11	1	5	Dead	70	White	Married (including common law)	20	T2	N1a	M1a	Alive or dead due to cancer	Dead (attributable to this cancer dx)	Yes	One primary only	Insured	Male
2012	180	Unknown	Not a paired site	8140/3: Adenocarcinoma, NOS	IV	IVB	40	None/Unknown	Yes	No radiation and/or cancer-directed surgery	50	15	4	41	Dead	44	White	Married (including common law)	20	T1	N1NOS	M1b	Alive or dead due to cancer	Dead (attributable to this cancer dx)	Yes	One primary only	Insured	Female
2012	184	Moderately differentiated; Grade II	Not a paired site	8480/3: Mucinous adenocarcinoma	IV	IVB	40	None/Unknown	No/Unknown	No radiation and/or cancer-directed surgery	150	4	0	7	Dead	77	Black	Divorced	10	T3	N1c	M1b	Alive or dead due to cancer	Dead (attributable to this cancer dx)	Yes	One primary only	Insured	Male
2012	187	Moderately differentiated; Grade II	Not a paired site	8140/3: Adenocarcinoma, NOS	IIIB	IIIC	30	None/Unknown	Yes	No radiation and/or cancer-directed surgery	60	16	0	45	Alive	65	White	Married (including common law)	20	T4b	N1c	M0	Alive or dead due to cancer	Alive or dead of other cause	Yes	One primary only	Insured	Female
2012	209	Unknown	Not a paired site	8140/3: Adenocarcinoma, NOS	IIIB	IIIB	30	Beam radiation	Yes	Radiation prior to surgery	70	16	1	43	Alive	69	White	Single (never married)	10	T3	N1a	M0	N/A not first tumor	N/A not first tumor	Yes	2nd of 2 or more primaries	Insured	Male
2012	199	Moderately differentiated; Grade II	Not a paired site	8140/3: Adenocarcinoma, NOS	IV	IVB	0	None/Unknown	Yes	No radiation and/or cancer-directed surgery	60	0	98	22	Dead	64	Black	Married (including common law)	20	TX	N0	M1b	Alive or dead due to cancer	Dead (attributable to this cancer dx)	Yes	One primary only	Insured	Male
2012	209	Moderately differentiated; Grade II	Not a paired site	8140/3: Adenocarcinoma, NOS	IIIB	IIIB	30	Beam radiation	Yes	Radiation prior to surgery	24	14	0	37	Alive	56	Black	Married (including common law)	10	T3	N1NOS	M0	Alive or dead due to cancer	Alive or dead of other cause	Yes	1st of 2 or more primaries	Any Medicaid	Male
2012	180	Unknown	Not a paired site	8140/3: Adenocarcinoma, NOS	IV	IVA	0	None/Unknown	No/Unknown	No radiation and/or cancer-directed surgery	50	0	98	19	Dead	70	White	Unknown	10	T1	N0	M1a	Alive or dead due to cancer	Dead (attributable to this cancer dx)	Yes	One primary only	Insured	Male
2012	187	Unknown	Not a paired site	8140/3: Adenocarcinoma, NOS	IV	IVA	90	None/Unknown	Yes	No radiation and/or cancer-directed surgery	999	0	98	16	Dead	83	White	Married (including common law)	20	T3	N1NOS	M1a	Dead (attributable to causes other than this cancer dx)	Alive or dead of other cause	Yes	One primary only	Insured/No specifics	Male
2012	186	Unknown	Not a paired site	8140/3: Adenocarcinoma, NOS	IV	IVB	0	None/Unknown	Yes	No radiation and/or cancer-directed surgery	999	0	98	8	Dead	70	Black	Divorced	20	TX	N0	M1b	Alive or dead due to cancer	Dead (attributable to this cancer dx)	Yes	One primary only	Insured	Female
2012	180	Undifferentiated; anaplastic; Grade IV	Not a paired site	8140/3: Adenocarcinoma, NOS	IV	IVA	40	None/Unknown	Yes	No radiation and/or cancer-directed surgery	120	16	15	12	Dead	67	White	Married (including common law)	20	T3	N2b	M1a	Alive or dead due to cancer	Dead (attributable to this cancer dx)	Yes	One primary only	Insured	Male
2012	184	Moderately differentiated; Grade II	Not a paired site	8140/3: Adenocarcinoma, NOS	IV	IVA	41	None/Unknown	No/Unknown	No radiation and/or cancer-directed surgery	25	26	2	28	Dead	80	White	Widowed	20	T4a	N1b	M1a	Alive or dead due to cancer	Dead (attributable to this cancer dx)	Yes	One primary only	Insured	Female
2012	186	Moderately differentiated; Grade II	Not a paired site	8140/3: Adenocarcinoma, NOS	IV	IVB	40	None/Unknown	Yes	No radiation and/or cancer-directed surgery	47	18	3	24	Dead	66	Black	Single (never married)	10	T4a	N1b	M1b	Alive or dead due to cancer	Dead (attributable to this cancer dx)	Yes	One primary only	Insured	Female
2012	186	Moderately differentiated; Grade II	Not a paired site	8140/3: Adenocarcinoma, NOS	IV	IVA	30	None/Unknown	No/Unknown	No radiation and/or cancer-directed surgery	60	17	0	21	Dead	51	Black	Single (never married)	10	T3	N0	M1a	Alive or dead due to cancer	Dead (attributable to this cancer dx)	Yes	One primary only	Insured	Female
2012	209	Moderately differentiated; Grade II	Not a paired site	8140/3: Adenocarcinoma, NOS	IV	IVB	0	None/Unknown	Yes	No radiation and/or cancer-directed surgery	50	0	98	9	Dead	87	Black	Widowed	10	T3	N1NOS	M1b	Alive or dead due to cancer	Dead (attributable to this cancer dx)	Yes	One primary only	Insured/No specifics	Female
[truncated: 7,764 more rows]
